# Supplementary material for: Umpolung α-regioselective 1,3-dipolar cycloaddition and internal recycle of byproduct as two key strategies: access to diverse chiral bipyridines
Source: Royal Society of Chemistry journal article supplement (doi:10.1039/d3qo01144e), 2023-01-01

# Umpolung $\alpha$ -regioselective 1,3-dipolar cycloaddition and internal recycle of byproduct as two key strategies: access to diverse chiral bipyridines

Yu-Heng Wang<sup>a,c</sup>, Xi-Rui Wang<sup>a,c</sup>, Ke-Lan Xu<sup>a,c</sup>, Zi-Yue Chen<sup>a</sup>, Bo-Wen Pan<sup>b</sup>, Li-Jun Peng<sup>a,\*</sup>,  
Ying Zhou<sup>b</sup>, and Xiong-Li Liu<sup>a,\*</sup>

<sup>a</sup> National & Local Joint Engineering Research Center for the Exploitation of Homology Resources of Southwest Medicine and Food, Guizhou University, Guiyang 550025, Guizhou, China.

<sup>b</sup> College of Pharmaceutical Sciences, Guizhou University of Traditional Chinese Medicine, Guiyang, 550025.

<sup>c</sup> These three authors contributed equally to this work.

\*E-mail address: ljpeng@gzu.edu.cn, xlliu1@gzu.edu.cn

## Table of Contents

|                                                                                                                           |     |
|---------------------------------------------------------------------------------------------------------------------------|-----|
| Table of contents.....                                                                                                    | S1  |
| 1. General experimental information.....                                                                                  | S2  |
| 2. The synthesis of perhydroindole-bipyridines <b>3</b> .....                                                             | S2  |
| 3. Characterization data of compounds <b>3</b> .....                                                                      | S2  |
| 4. The synthesis of pyrrolidine-bipyridines <b>4</b> .....                                                                | S9  |
| 5. Characterization data of compounds <b>4</b> .....                                                                      | S10 |
| 6. Preparative scale synthesis of two diastereoisomers <b>3a-1</b> and <b>3a-2</b> .....                                  | S11 |
| 7. The further chemical transformations of the compounds <b>3</b> into compounds <b>6</b> .....                           | S12 |
| 8. Characterization data of compounds <b>6</b> .....                                                                      | S12 |
| 9. Figure S1: reaction solution detected by ESI-MS analysis.....                                                          | S16 |
| 10. X-ray crystal data for compounds <b>3b-2</b> , <b>3g-2</b> , <b>4d-1</b> and <b>6c-1</b> .....                        | S17 |
| 11. The copies of <sup>1</sup> H NMR and <sup>13</sup> C NMR spectra for compounds <b>3</b> , <b>4</b> and <b>6</b> ..... | S21 |

## 1. General information

Reactions were monitored by thin layer chromatography using UV light to visualize the course of reaction. Purification of reaction products was carried out by flash chromatography on silica gel or just by simple filtration and washing.  $^1\text{H}$  and  $^{13}\text{C}$ NMR spectra were obtained using a Bruker DPX-400 spectrometer.  $^1\text{H}$  NMR chemical shifts are reported in ppm ( $\delta$ ) relative to tetramethylsilane (TMS) with the solvent resonance employed as the internal standard. Data are reported as follows: chemical shift, multiplicity (s = singlet, d = doublet, t = triplet, m = multiplet), coupling constants (Hz) and integration.  $^{13}\text{C}$  NMR chemical shifts are reported in ppm ( $\delta$ ) from tetramethylsilane (TMS) with the solvent resonance as the internal standard. Melting points were measured on an electrothermal digital melting point apparatus.

## 2. The synthesis of perhydroindole-bipyridines 3

In a sealed tube equipped with a magnetic stirring bar, a mixture of optically pure perhydroindole-2-carboxylic acid **1** (0.6 mmol) and pyridinecarboxaldehyde **2** (0.4 mmol) in 2.0 mL of toluene was stirred at 80 °C for 1 h, and then was directly loaded onto a silica gel and purified by flash chromatography to give the desired product **3**, using hexane/EtOAc (7/1, v/v) as the eluent.

## 3. Characterization data of compounds 3

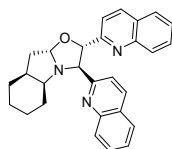

**3a-1:** Light yellow oil; 27.8 mg, yield 33%;  $^1\text{H}$  NMR ( $\text{CDCl}_3$ , 400 MHz)  $\delta$ : 1.07-1.13 (m, 1H), 1.18-1.20 (m, 1H), 1.36-1.44 (m, 3H), 1.52-1.59 (m, 3H), 1.92-1.96 (m, 1H), 2.16-2.23 (m, 2H), 3.22 (d,  $J = 3.6$  Hz, 1H), 4.68 (d,  $J = 6.0$  Hz, 1H), 5.41-5.43 (m, 1H), 5.49 (d,  $J = 7.2$  Hz, 1H), 7.36-7.41 (m, 2H), 7.51-7.57 (m, 2H), 7.69-7.73 (m, 3H), 7.78 (d,  $J = 7.6$  Hz, 1H), 7.85 (d,  $J = 8.4$  Hz, 1H), 7.90 (d,  $J = 8.8$  Hz, 1H), 8.08 (d,  $J = 8.4$  Hz, 2H);  $^{13}\text{C}$  NMR ( $\text{CDCl}_3$ , 100 MHz)  $\delta$ : 19.1, 23.8, 26.5, 28.2, 36.5, 37.9, 62.0, 73.1, 86.1, 98.1, 118.0, 118.7, 124.7, 124.9, 126.2, 126.4, 127.9, 128.0, 128.2, 135.4, 135.5, 146.2, 146.3, 159.2, 161.3; HRMS (ESI-TOF)  $m/z$ : Calcd. for  $\text{C}_{28}\text{H}_{28}\text{N}_3\text{O}$   $[\text{M}+\text{H}]^+$ : 422.2227; Found: 422.2231.

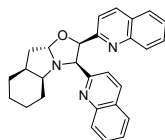

**3a-2:** Light yellow oil; 31.2 mg, yield 37%;  $^1\text{H}$  NMR ( $\text{CDCl}_3$ , 400 MHz)  $\delta$ : 1.12-1.24 (m, 3H), 1.40-1.59 (m, 4H), 1.72 (d,  $J = 11.6$  Hz, 1H), 1.99-2.10 (m, 2H), 2.16-2.20 (m, 1H), 3.30 (d,  $J = 4.0$  Hz, 1H), 4.92 (d,  $J = 6.8$  Hz, 1H), 5.73 (d,  $J = 6.8$  Hz, 1H), 5.99-6.02 (m, 1H), 6.81 (d,  $J = 8.4$  Hz, 1H), 7.22-7.30 (m, 2H), 7.32-7.36 (m, 3H), 7.40-7.43 (m, 2H), 7.47-7.53 (m, 2H), 7.72 (d,  $J = 8.4$  Hz, 1H), 7.89 (d,  $J = 8.4$  Hz, 1H);  $^{13}\text{C}$  NMR ( $\text{CDCl}_3$ , 100 MHz)  $\delta$ : 18.4, 23.3, 26.8, 27.1, 36.6, 37.6, 61.7, 70.8, 80.0, 98.0, 117.4, 118.5, 123.9, 124.0, 125.3, 125.4, 126.9, 127.0, 127.1, 127.2, 133.1, 133.7, 145.0, 145.3, 157.7, 158.7; HRMS (ESI-TOF)  $m/z$ : Calcd. for  $\text{C}_{28}\text{H}_{28}\text{N}_3\text{O}$   $[\text{M}+\text{H}]^+$ : 422.2227; Found: 422.2225.

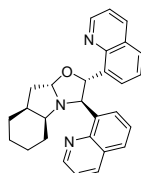

**3b-1:** Light yellow solid; 17.7 mg, yield 21%;  $^1\text{H}$  NMR ( $\text{CDCl}_3$ , 400 MHz)  $\delta$ : 1.07-1.12 (m, 2H), 1.33-1.46 (m, 3H), 1.53-1.56 (m, 3H), 2.01-2.05 (m, 1H), 2.24-2.27 (m, 2H), 3.44 (d,  $J = 2.8$  Hz, 1H), 5.30 (d,  $J = 7.6$  Hz, 1H), 5.57-5.58 (m, 1H), 6.01 (d,  $J = 7.6$  Hz, 1H), 6.77-6.80 (m, 1H), 6.84-6.88 (m, 1H), 7.53-7.57 (m, 3H), 7.60-7.64 (m, 2H), 7.77-7.83 (m, 3H), 8.18 (d,  $J = 6.4$  Hz, 1H), 8.24-8.26 (m, 1H);  $^{13}\text{C}$  NMR ( $\text{CDCl}_3$ , 100 MHz)  $\delta$ : 19.5, 24.2, 26.9, 28.6, 36.7, 38.5, 63.6, 69.1, 83.3, 97.4, 118.8, 119.0, 125.4, 125.5, 125.6, 134.1, 134.3, 138.2, 141.1, 145.2, 145.3, 146.3, 146.9; HRMS (ESI-TOF)  $m/z$ : Calcd. for  $\text{C}_{28}\text{H}_{28}\text{N}_3\text{O}$   $[\text{M}+\text{H}]^+$ : 422.2227; Found: 422.2224.

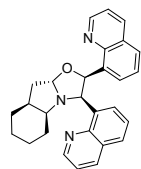

**3b-2:** Light yellow solid; 32.0 mg, yield 38%;  $^1\text{H}$  NMR ( $\text{CDCl}_3$ , 400 MHz)  $\delta$ : 1.17-1.22 (m, 3H), 1.43-1.59 (m, 4H), 1.84 (d,  $J = 7.2$  Hz, 1H), 1.99-2.10 (m, 2H), 2.15-2.19 (m, 1H), 3.59 (s, 1H), 5.84-5.87 (m, 2H), 6.60-6.68 (m, 2H), 6.80 (d,  $J = 5.6$  Hz, 2H), 7.03-7.06 (m, 1H), 7.19-7.25 (m, 1H), 7.33-7.38 (m, 2H), 7.57-7.61 (m, 2H), 7.73-7.77 (m, 2H), 8.93 (s, 1H);  $^{13}\text{C}$  NMR ( $\text{CDCl}_3$ ,

100 MHz)  $\delta$ : 19.2, 24.4, 27.9, 28.2, 37.0, 38.9, 62.8, 64.3, 73.1, 96.9, 118.4, 119.1, 123.6, 124.8, 124.9, 125.0, 125.5, 125.8, 125.9, 127.4, 133.9, 134.5, 135.6, 144.6, 145.6, 145.8, 147.9; HRMS (ESI-TOF)  $m/z$ : Calcd. for  $C_{28}H_{28}N_3O$   $[M+H]^+$ : 422.2227; Found: 422.2229.

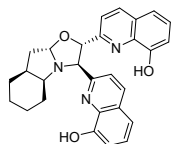

**3c**: Light yellow solid; 37.1 mg, yield 41%, 17:1 dr;  $^1H$  NMR ( $CDCl_3$ , 400 MHz)  $\delta$ : 1.12-1.18 (m, 1H), 1.27-1.30 (m, 1H), 1.35-1.48 (m, 2H), 1.54-1.60 (m, 3H), 1.75 (d,  $J = 13.2$  Hz, 1H), 1.98-2.11 (m, 2H), 2.18-2.22 (m, 1H), 3.28 (d,  $J = 2.8$  Hz, 1H), 4.88 (d,  $J = 6.4$  Hz, 1H), 5.68 (d,  $J = 6.8$  Hz, 1H), 5.84-5.86 (m, 1H), 6.83 (d,  $J = 7.2$  Hz, 1H), 6.98-7.04 (m, 4H), 7.15-7.24 (m, 3H), 7.40 (d,  $J = 8.4$  Hz, 1H), 7.61 (d,  $J = 8.8$  Hz, 1H), 7.80 (d,  $J = 8.8$  Hz, 1H);  $^{13}C$  NMR ( $CDCl_3$ , 100 MHz)  $\delta$ : 19.2, 24.1, 27.7, 28.0, 37.4, 38.4, 62.4, 70.8, 80.1, 98.5, 108.5, 108.8, 116.3, 116.6, 119.0, 120.1, 126.0, 126.1, 134.6, 135.0, 135.7, 135.9, 150.5, 150.6, 156.5, 157.2; HRMS (ESI-TOF)  $m/z$ : Calcd. for  $C_{28}H_{28}N_3O_3$   $[M+H]^+$ : 454.2125; Found: 454.2115.

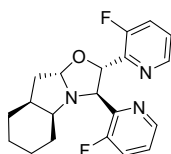

**3d**: Light yellow oil; 24.3 mg, yield 34%, 12:1 dr;  $^1H$  NMR ( $CDCl_3$ , 400 MHz)  $\delta$ : 1.06-1.18 (m, 2H), 1.27-1.34 (m, 2H), 1.41-1.48 (m, 3H), 1.63-1.67 (m, 1H), 1.81-1.85 (m, 1H), 2.09-2.16 (m, 2H), 3.32-3.35 (m, 1H), 4.86 (d,  $J = 6.8$  Hz, 1H), 5.43-5.45 (m, 1H), 5.76 (d,  $J = 6.8$  Hz, 1H), 7.08-7.16 (m, 2H), 7.20-7.27 (m, 2H), 8.33-8.37 (m, 2H);  $^{13}C$  NMR ( $CDCl_3$ , 100 MHz)  $\delta$ : 19.2, 23.9, 26.8, 28.2, 36.0, 37.7, 62.6, 65.5, 78.5, 98.7, 121.9, 122.1 (d,  $J_{CF} = 4.2$  Hz), 122.3 (d,  $J_{CF} = 2.4$  Hz), 123.3 (d,  $J_{CF} = 4.1$  Hz), 144.0 (d,  $J_{CF} = 5.2$  Hz), 144.3 (d,  $J_{CF} = 5.3$  Hz), 145.0 (d,  $J_{CF} = 12.3$  Hz), 148.6 (d,  $J_{CF} = 13.1$  Hz), 156.6 (d,  $J_{CF} = 257.0$  Hz), 157.5 (d,  $J_{CF} = 258.2$  Hz); HRMS (ESI-TOF)  $m/z$ : Calcd. for  $C_{20}H_{22}F_2N_3O$   $[M+H]^+$ : 358.1725; Found: 358.1721.

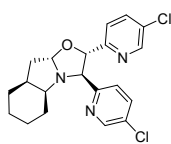

**3e-1**: Light yellow oil; 19.5 mg, yield 25%;  $^1H$  NMR ( $CDCl_3$ , 400 MHz)  $\delta$ : 1.09-1.15 (m, 1H),

1.25-1.27 (m, 1H), 1.34-1.42 (m, 3H), 1.48-1.57 (m, 3H), 1.87-1.92 (m, 1H), 2.08-2.13 (m, 2H), 3.07 (d,  $J = 2.8$  Hz, 1H), 4.39 (d,  $J = 6.0$  Hz, 1H), 5.06 (d,  $J = 5.6$  Hz, 1H), 5.24-5.26 (m, 1H), 7.43 (d,  $J = 8.4$  Hz, 1H), 7.56-7.59 (m, 3H);  $^{13}\text{C}$  NMR ( $\text{CDCl}_3$ , 100 MHz)  $\delta$ : 19.4, 24.0, 26.6, 28.5, 36.8, 37.9, 61.8, 71.7, 85.4, 98.1, 121.1, 121.2, 129.3, 129.7, 135.3, 135.4, 147.1, 147.2, 157.5, 159.6; HRMS (ESI-TOF)  $m/z$ : Calcd. for  $\text{C}_{20}\text{H}_{22}\text{Cl}_2\text{N}_3\text{O}$   $[\text{M}+\text{H}]^+$ : 390.1134 and 392.1105; Found: 390.1132 and 392.1108.

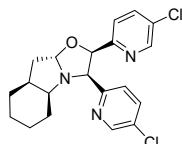

**3e-2**: Light yellow oil; 16.3 mg, yield 21%;  $^1\text{H}$  NMR ( $\text{CDCl}_3$ , 400 MHz)  $\delta$ : 1.11-1.18 (m, 1H), 1.24-1.30 (m, 1H), 1.33-1.42 (m, 2H), 1.45-1.51 (m, 1H), 1.53-1.57 (m, 2H), 1.64-1.68 (m, 1H), 1.87-1.93 (m, 1H), 1.99-2.04 (m, 1H), 2.09-2.16 (m, 1H), 3.16 (d,  $J = 4.0$  Hz, 1H), 4.59 (d,  $J = 6.4$  Hz, 1H), 5.40 (d,  $J = 6.4$  Hz, 1H), 5.72-5.75 (m, 1H), 6.83 (d,  $J = 8.4$  Hz, 1H), 7.17-7.20 (m, 1H), 7.25-7.28 (m, 1H), 7.37-7.40 (m, 1H), 8.05 (d,  $J = 2.4$  Hz, 1H), 8.28 (d,  $J = 2.0$  Hz, 1H);  $^{13}\text{C}$  NMR ( $\text{CDCl}_3$ , 100 MHz)  $\delta$ : 19.1, 24.1, 27.6, 27.8, 37.1, 38.3, 62.4, 70.0, 79.1, 98.2, 121.0, 122.0, 128.6, 129.0, 134.4, 134.6, 145.9, 146.3, 155.8, 157.1; HRMS (ESI-TOF)  $m/z$ : Calcd. for  $\text{C}_{20}\text{H}_{22}\text{Cl}_2\text{N}_3\text{O}$   $[\text{M}+\text{H}]^+$ : 390.1134 and 392.1105; Found: 390.1134 and 392.1104.

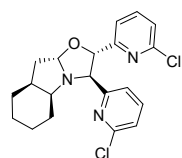

**3f**: Light yellow oil; 17.9 mg, yield 23%, 5:1 dr;  $^1\text{H}$  NMR ( $\text{CDCl}_3$ , 400 MHz)  $\delta$ : 1.10-1.16 (m, 1H), 1.24-1.28 (m, 1H), 1.34-1.43 (m, 3H), 1.50-1.56 (m, 3H), 1.85-1.89 (m, 1H), 2.08-2.16 (m, 2H), 3.17 (d,  $J = 2.8$  Hz, 1H), 4.35 (d,  $J = 6.0$  Hz, 1H), 5.02 (d,  $J = 5.6$  Hz, 1H), 5.23-5.25 (m, 1H), 7.10-7.16 (m, 2H), 7.41 (d,  $J = 7.6$  Hz, 1H), 7.52-7.59 (m, 3H);  $^{13}\text{C}$  NMR ( $\text{CDCl}_3$ , 100 MHz)  $\delta$ : 19.4, 24.1, 26.5, 28.5, 36.6, 37.9, 61.7, 71.7, 85.3, 98.2, 118.7, 119.1, 121.5, 122.2, 138.1, 138.2, 149.5, 149.8, 159.9, 162.5; HRMS (ESI-TOF)  $m/z$ : Calcd. for  $\text{C}_{20}\text{H}_{22}\text{Cl}_2\text{N}_3\text{O}$   $[\text{M}+\text{H}]^+$ : 390.1134 and 392.1105; Found: 390.1137 and 392.1102.

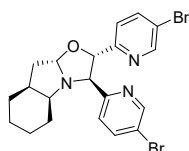

**3g-1:** Light yellow solid; 20.0 mg, yield 21%;  $^1\text{H}$  NMR ( $\text{CDCl}_3$ , 400 MHz)  $\delta$ : 1.10-1.16 (m, 1H), 1.25-1.27 (m, 1H), 1.34-1.42 (m, 3H), 1.48-1.54 (m, 3H), 1.88-1.92 (m, 1H), 2.09-2.15 (m, 2H), 3.07 (d,  $J = 3.2$  Hz, 1H), 4.37 (d,  $J = 6.0$  Hz, 1H), 5.05 (d,  $J = 6.0$  Hz, 1H), 5.24-5.26 (m, 1H), 7.39 (d,  $J = 8.4$  Hz, 1H), 7.53 (d,  $J = 8.4$  Hz, 1H), 7.71-7.74 (m, 2H), 8.51 (d,  $J = 2.4$  Hz, 1H), 8.57 (d,  $J = 2.4$  Hz, 1H);  $^{13}\text{C}$  NMR ( $\text{CDCl}_3$ , 100 MHz)  $\delta$ : 19.4, 24.1, 26.6, 28.5, 36.8, 37.9, 61.8, 71.7, 85.4, 98.1, 117.8, 118.4, 121.7, 138.2, 149.2, 149.4, 157.9, 160.0; HRMS (ESI-TOF)  $m/z$ : Calcd. for  $\text{C}_{20}\text{H}_{22}\text{Br}_2\text{N}_3\text{O}$   $[\text{M}+\text{H}]^+$ : 478.0124 and 480.0104; Found: 478.0123 and 480.0107.

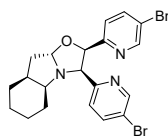

**3g-2:** Light yellow solid; 28.6 mg, yield 30%;  $^1\text{H}$  NMR ( $\text{CDCl}_3$ , 400 MHz)  $\delta$ : 1.11-1.18 (m, 1H), 1.24-1.27 (m, 1H), 1.32-1.42 (m, 2H), 1.45-1.58 (m, 3H), 1.63-1.67 (m, 1H), 1.86-1.92 (m, 1H), 1.99-2.04 (m, 1H), 2.10-2.14 (m, 1H), 3.15 (d,  $J = 3.6$  Hz, 1H), 4.56 (d,  $J = 6.4$  Hz, 1H), 5.37 (d,  $J = 6.4$  Hz, 1H), 5.71-5.74 (m, 1H), 6.78 (d,  $J = 8.4$  Hz, 1H), 7.13 (d,  $J = 8.4$  Hz, 1H), 7.41-7.43 (m, 1H), 7.52-7.54 (m, 1H), 8.16 (d,  $J = 2.0$  Hz, 1H), 8.38 (d,  $J = 2.0$  Hz, 1H);  $^{13}\text{C}$  NMR ( $\text{CDCl}_3$ , 100 MHz)  $\delta$ : 19.1, 24.1, 27.6, 27.8, 37.1, 38.3, 62.4, 70.0, 79.1, 98.2, 117.4, 117.6, 121.6, 122.6, 137.3, 137.5, 148.1, 148.5, 156.2, 157.4; HRMS (ESI-TOF)  $m/z$ : Calcd. for  $\text{C}_{20}\text{H}_{22}\text{Br}_2\text{N}_3\text{O}$   $[\text{M}+\text{H}]^+$ : 478.0124 and 480.0104; Found: 478.0127 and 480.0107.

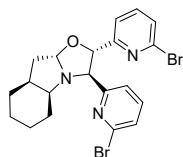

**3h-1:** Light yellow solid; 19.1 mg, yield 20%;  $^1\text{H}$  NMR ( $\text{CDCl}_3$ , 400 MHz)  $\delta$ : 1.10-1.16 (m, 1H), 1.24-1.28 (m, 1H), 1.33-1.43 (m, 3H), 1.50-1.56 (m, 3H), 1.84-1.89 (m, 1H), 2.07-2.16 (m, 2H), 3.18 (d,  $J = 3.2$  Hz, 1H), 4.35 (d,  $J = 5.6$  Hz, 1H), 5.01 (d,  $J = 5.6$  Hz, 1H), 5.21-5.23 (m, 1H), 7.25-7.31 (m, 2H), 7.43-7.48 (m, 3H), 7.56 (d,  $J = 7.6$  Hz, 1H);  $^{13}\text{C}$  NMR ( $\text{CDCl}_3$ , 100 MHz)  $\delta$ : 19.2, 23.8, 26.3, 28.2, 36.3, 37.6, 61.4, 71.4, 85.1, 97.9, 118.7, 119.1, 125.0, 125.7, 137.6, 137.7,

140.0, 140.3, 160.1, 162.7; HRMS (ESI-TOF)  $m/z$ : Calcd. for  $C_{20}H_{22}Br_2N_3O$   $[M+H]^+$ : 478.0124 and 480.0104; Found: 478.0127 and 480.0099.

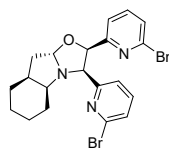

**3h-2**: Light yellow solid; 30.5 mg, yield 32%;  $^1H$  NMR ( $CDCl_3$ , 400 MHz)  $\delta$ : 1.12-1.17 (m, 1H), 1.25-1.31 (m, 1H), 1.33-1.50 (m, 3H), 1.52-1.58 (m, 2H), 1.65-1.68 (m, 1H), 1.89-2.02 (m, 2H), 2.09-2.15 (m, 1H), 3.12-3.14 (m, 1H), 4.64 (d,  $J = 6.4$  Hz, 1H), 5.40 (d,  $J = 6.8$  Hz, 1H), 5.71-5.74 (m, 1H), 6.86 (d,  $J = 7.6$  Hz, 1H), 7.00-7.02 (m, 1H), 7.09-7.11 (m, 1H), 7.15-7.20 (m, 1H), 7.23-7.30 (m, 2H);  $^{13}C$  NMR ( $CDCl_3$ , 100 MHz)  $\delta$ : 20.2, 25.2, 28.4, 29.0, 38.3, 39.2, 63.0, 70.8, 80.3, 99.5, 120.1, 121.0, 125.5, 126.2, 137.8, 138.1, 140.3, 140.7, 160.3, 161.3; HRMS (ESI-TOF)  $m/z$ : Calcd. for  $C_{20}H_{22}Br_2N_3O$   $[M+H]^+$ : 478.0124 and 480.0104; Found: 478.0126 and 480.0101.

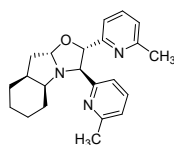

**3i-1**: Light yellow oil; 23.0 mg, yield 33%;  $^1H$  NMR ( $CDCl_3$ , 400 MHz)  $\delta$ : 1.09-1.15 (m, 1H), 1.18-1.24 (m, 1H), 1.35-1.42 (m, 3H), 1.51-1.55 (m, 3H), 1.86-1.90 (m, 1H), 2.09-2.15 (m, 2H), 2.38 (s, 3H), 2.44 (s, 3H), 3.19 (d,  $J = 2.4$  Hz, 1H), 4.36 (d,  $J = 6.0$  Hz, 1H), 5.00 (d,  $J = 6.0$  Hz, 1H), 5.27-5.29 (m, 1H), 6.90 (d,  $J = 7.2$  Hz, 1H), 6.94 (d,  $J = 7.6$  Hz, 1H), 7.31 (d,  $J = 7.6$  Hz, 1H), 7.41-7.49 (m, 3H);  $^{13}C$  NMR ( $CDCl_3$ , 100 MHz)  $\delta$ : 19.5, 23.4, 23.5, 24.1, 26.7, 28.5, 36.8, 38.0, 61.8, 72.4, 86.8, 97.9, 117.0, 117.4, 120.3, 121.0, 135.6, 135.7, 156.4, 156.7, 158.5, 161.1; HRMS (ESI-TOF)  $m/z$ : Calcd. for  $C_{22}H_{28}N_3O$   $[M+H]^+$ : 350.2227; Found: 350.2228.

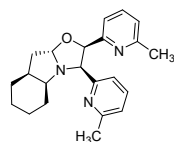

**3i-2**: Light yellow oil; 28.6 mg, yield 41%;  $^1H$  NMR ( $CDCl_3$ , 400 MHz)  $\delta$ : 1.11-1.18 (m, 1H), 1.24-1.26 (m, 1H), 1.35-1.48 (m, 3H), 1.55 (d,  $J = 12.0$  Hz, 2H), 1.69-1.71 (m, 1H), 1.89-1.94 (m, 1H), 1.97-2.02 (m, 1H), 2.06 (s, 3H), 2.09-2.13 (m, 1H), 2.36 (s, 3H), 3.19 (d,  $J = 1.6$  Hz, 1H), 4.61 (d,  $J = 6.4$  Hz, 1H), 5.41 (d,  $J = 6.4$  Hz, 1H), 5.74-5.77 (m, 1H), 5.52 (d,  $J = 7.6$  Hz, 1H),

6.63 (d,  $J = 7.6$  Hz, 1H), 6.90 (d,  $J = 7.6$  Hz, 1H), 7.05-7.08 (m, 2H), 7.25-7.29 (m, 1H);  $^{13}\text{C}$  NMR ( $\text{CDCl}_3$ , 100 MHz)  $\delta$ : 20.2, 23.9, 24.3, 25.3, 28.6, 29.0, 38.2, 39.5, 63.2, 71.6, 81.2, 99.2, 118.1, 118.9, 120.3, 120.9, 135.3, 135.8, 156.2, 156.7, 158.3, 159.4; HRMS (ESI-TOF)  $m/z$ : Calcd. for  $\text{C}_{22}\text{H}_{28}\text{N}_3\text{O}$   $[\text{M}+\text{H}]^+$ : 350.2227; Found: 350.2229.

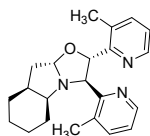

**3j**: Light yellow oil; 16.1 mg, yield 23%, 12:1 dr;  $^1\text{H}$  NMR ( $\text{CDCl}_3$ , 400 MHz)  $\delta$ : 1.07-1.10 (m, 2H), 1.26-1.32 (m, 1H), 1.40-1.45 (m, 5H), 1.84-1.90 (m, 1H), 2.01 (s, 3H), 2.06-2.09 (m, 1H), 2.16-2.19 (m, 4H), 3.24-3.27 (m, 1H), 4.84 (d,  $J = 7.6$  Hz, 1H), 5.48 (d,  $J = 7.6$  Hz, 1H), 5.53-5.55 (m, 1H), 6.91-6.94 (m, 1H), 6.97-7.00 (m, 1H), 7.21-7.27 (m, 2H), 8.39-8.43 (m, 2H);  $^{13}\text{C}$  NMR ( $\text{CDCl}_3$ , 100 MHz)  $\delta$ : 17.2, 17.7, 19.5, 23.7, 27.5, 28.0, 36.0, 37.8, 63.7, 68.8, 83.8, 98.5, 120.5, 121.8, 130.2, 131.6, 136.9, 137.1, 145.9, 146.3, 153.9, 158.5; HRMS (ESI-TOF)  $m/z$ : Calcd. for  $\text{C}_{22}\text{H}_{28}\text{N}_3\text{O}$   $[\text{M}+\text{H}]^+$ : 350.2227; Found: 350.2228.

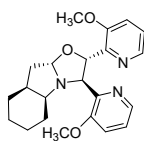

**3k-1**: Light yellow oil; 25.9 mg, yield 34%;  $^1\text{H}$  NMR ( $\text{CDCl}_3$ , 400 MHz)  $\delta$ : 1.09-1.17 (m, 1H), 1.27-1.31 (m, 1H), 1.37-1.65 (m, 6H), 1.80-1.84 (m, 1H), 2.08-2.16 (m, 2H), 3.40-3.43 (m, 1H), 3.66 (s, 3H), 3.80 (s, 3H), 4.45 (d,  $J = 5.6$  Hz, 1H), 4.99 (d,  $J = 5.6$  Hz, 1H), 5.17-5.19 (m, 1H), 6.47 (d,  $J = 8.4$  Hz, 1H), 6.54 (d,  $J = 8.8$  Hz, 1H), 6.97 (d,  $J = 7.2$  Hz, 1H), 7.16 (d,  $J = 7.6$  Hz, 1H), 7.41-7.46 (m, 2H);  $^{13}\text{C}$  NMR ( $\text{CDCl}_3$ , 100 MHz)  $\delta$ : 19.6, 24.3, 26.5, 28.8, 36.5, 37.7, 51.9, 52.1, 60.7, 70.8, 85.6, 98.0, 107.5, 108.7, 112.0, 114.0, 137.7, 137.8, 156.8, 159.8, 162.4, 162.8; HRMS (ESI-TOF)  $m/z$ : Calcd. for  $\text{C}_{22}\text{H}_{28}\text{N}_3\text{O}_3$   $[\text{M}+\text{H}]^+$ : 382.2125; Found: 382.2126.

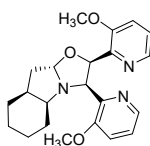

**3k-2**: Light yellow oil; 16.8 mg, yield 22%;  $^1\text{H}$  NMR ( $\text{CDCl}_3$ , 400 MHz)  $\delta$ : 1.15 (m, 1H), 1.25-1.28 (m, 1H), 1.36-1.40 (m, 1H), 1.47-1.58 (m, 4H), 1.70-1.73 (m, 1H), 1.92-1.96 (m, 2H), 2.09-



2.14 (m, 1H), 3.15-3.16 (m, 1H), 3.43 (s, 3H), 3.69 (s, 3H), 4.50 (d,  $J = 6.8$  Hz, 1H), 5.31 (d,  $J = 6.8$  Hz, 1H), 5.74-5.77 (m, 1H), 6.25 (d,  $J = 8.0$  Hz, 1H), 6.30 (d,  $J = 8.0$  Hz, 1H), 6.50 (d,  $J = 7.6$  Hz, 1H), 6.89 (d,  $J = 6.8$  Hz, 1H), 7.14-7.17 (m, 1H), 7.25-7.29 (m, 1H);  $^{13}\text{C}$  NMR ( $\text{CDCl}_3$ , 100 MHz)  $\delta$ : 19.3, 24.2, 27.5, 28.2, 37.3, 38.2, 51.7, 52.1, 61.9, 69.8, 79.9, 98.0, 106.8, 107.1, 113.2, 113.6, 137.0, 137.1, 156.1, 157.1, 161.3, 161.8; HRMS (ESI-TOF)  $m/z$ : Calcd. for  $\text{C}_{22}\text{H}_{28}\text{N}_3\text{O}_3$   $[\text{M}+\text{H}]^+$ : 382.2125; Found: 382.2127.

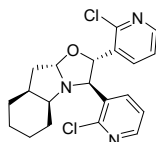

**3l**: Light yellow oil; 33.5 mg, 43% yield, 6:1 dr;  $^1\text{H}$  NMR ( $\text{CDCl}_3$ , 400 MHz)  $\delta$ : 1.11-1.22 (m, 3H), 1.32-1.38 (m, 3H), 1.50-1.59 (m, 2H), 1.96-2.01 (m, 1H), 2.07-2.13 (m, 1H), 2.19-2.24 (m, 1H), 3.14-3.17 (m, 1H), 4.18 (d,  $J = 7.6$  Hz, 1H), 5.02 (d,  $J = 8.0$  Hz, 1H), 5.36-5.39 (m, 1H), 7.20-7.25 (m, 2H), 7.93-7.95 (m, 1H), 8.06-8.09 (m, 1H), 8.22-8.28 (m, 2H);  $^{13}\text{C}$  NMR ( $\text{CDCl}_3$ , 100 MHz)  $\delta$ : 18.9, 24.0, 27.4, 28.0, 36.7, 38.3, 63.2, 64.6, 73.3, 97.3, 120.6, 121.2, 130.0, 132.8, 135.9, 137.8, 147.0, 147.7, 149.1, 149.4; HRMS (ESI-TOF)  $m/z$ : Calcd. for  $\text{C}_{20}\text{H}_{22}\text{Cl}_2\text{N}_3\text{O}$   $[\text{M}+\text{H}]^+$ : 390.1134 and 392.1105; Found: 390.1137 and 392.1106.

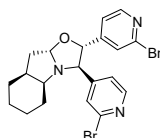

**3m**: Light yellow oil; 48.7 mg, 51% yield, 12:1 dr;  $^1\text{H}$  NMR ( $\text{CDCl}_3$ , 400 MHz)  $\delta$ : 1.18-1.22 (m, 2H), 1.25-1.31 (m, 2H), 1.35-1.42 (m, 2H), 1.56-1.57 (m, 2H), 1.96-2.01 (m, 1H), 2.08-2.14 (m, 1H), 2.18-2.25 (m, 1H), 3.05-3.07 (m, 1H), 3.61 (d,  $J = 7.6$  Hz, 1H), 4.45 (d,  $J = 7.6$  Hz, 1H), 5.27-5.30 (m, 1H), 6.99-7.03 (m, 2H), 7.39-7.42 (m, 2H);  $^{13}\text{C}$  NMR ( $\text{CDCl}_3$ , 100 MHz)  $\delta$ : 20.3, 24.6, 27.8, 29.2, 37.2, 39.4, 65.1, 74.5, 86.9, 99.5, 120.4, 121.1, 125.3, 126.1, 142.8, 142.9, 150.4, 150.5, 150.6, 153.6; HRMS (ESI-TOF)  $m/z$ : Calcd. for  $\text{C}_{20}\text{H}_{22}\text{Br}_2\text{N}_3\text{O}$   $[\text{M}+\text{H}]^+$ : 478.0124 and 480.0104; Found: 478.0121 and 480.0100.

#### 4. The synthesis of pyrrolidine-bipyridines 4

In a sealed tube equipped with a magnetic stirring bar, a mixture of *L*-proline (0.6 mmol) and

pyridinecarboxaldehyde **2** (0.4 mmol) in 2.0 mL of toluene was stirred at 80 °C for 1 h, and then was directly loaded onto a silica gel and purified by flash chromatography to give the desired product **4**, using hexane/EtOAc (6/1, v/v) as the eluent.

#### 5. Characterization data of compounds **4**

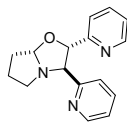

**4a**: Light yellow oil; 21.9 mg, yield 41%, 10:1 dr;  $^1\text{H NMR}$  ( $\text{CDCl}_3$ , 400 MHz)  $\delta$ : 1.74-1.80 (m, 1H), 1.89-1.99 (m, 1H), 2.09-2.13 (m, 2H), 2.79-2.85 (m, 1H), 3.11-3.16 (m, 1H), 4.49 (d,  $J = 6.0$  Hz, 1H), 5.17 (d,  $J = 5.6$  Hz, 1H), 5.30 (d,  $J = 1.2$  Hz, 1H), 7.04-7.08 (m, 2H), 7.39-7.46 (m, 2H), 7.53-7.59 (m, 2H), 8.47-8.51 (m, 2H);  $^{13}\text{C NMR}$  ( $\text{CDCl}_3$ , 100 MHz)  $\delta$ : 21.4, 28.6, 52.6, 73.7, 83.5, 97.0, 118.3, 119.5, 119.6, 119.9, 134.1, 134.2, 146.8, 147.1, 157.8, 159.1; HRMS (ESI-TOF)  $m/z$ : Calcd. for  $\text{C}_{16}\text{H}_{18}\text{N}_3\text{O}$   $[\text{M}+\text{H}]^+$ : 268.1444; Found: 268.1445.

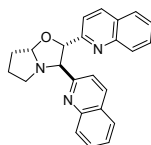

**4b**: Light yellow oil; 52.1 mg, yield 71%, 19:1 dr;  $^1\text{H NMR}$  ( $\text{CDCl}_3$ , 400 MHz)  $\delta$ : 1.78-1.86 (m, 1H), 1.94-2.04 (m, 1H), 2.12-2.22 (m, 2H), 2.88-2.95 (m, 1H), 3.18-3.24 (m, 1H), 4.83 (d,  $J = 5.6$  Hz, 1H), 5.43-5.44 (m, 1H), 5.54 (d,  $J = 6.0$  Hz, 1H), 7.38-7.43 (m, 2H), 7.55-7.58 (m, 2H), 7.66-7.72 (m, 4H), 7.91-7.96 (m, 2H), 8.07-8.10 (m, 2H);  $^{13}\text{C NMR}$  ( $\text{CDCl}_3$ , 100 MHz)  $\delta$ : 22.9, 30.2, 54.3, 75.7, 85.0, 98.8, 117.8, 119.5, 125.1, 125.2, 126.4, 126.5, 126.6, 128.2, 128.3, 128.4, 128.5, 135.7, 135.8, 146.6, 146.7, 159.7, 160.8; HRMS (ESI-TOF)  $m/z$ : Calcd. for  $\text{C}_{24}\text{H}_{22}\text{N}_3\text{O}$   $[\text{M}+\text{H}]^+$ : 368.1757; Found: 368.1754.

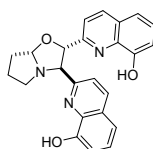

**4c**: Light yellow oil; 48.7 mg, yield 61%, 15:1 dr;  $^1\text{H NMR}$  ( $\text{CDCl}_3$ , 400 MHz)  $\delta$ : 1.79-1.88 (m, 1H), 1.96-2.06 (m, 1H), 2.13-2.19 (m, 2H), 2.86-2.92 (m, 1H), 3.21-3.26 (m, 1H), 4.67 (d,  $J = 6.0$  Hz, 1H), 5.31-5.32 (m, 1H), 5.49 (d,  $J = 6.0$  Hz, 1H), 7.05-7.08 (m, 2H), 7.21-7.24 (m, 2H), 7.30-

7.35 (m, 2H), 7.63-7.67 (m, 2H), 7.90 (br s, 2H), 8.07-8.11 (m, 2H); <sup>13</sup>C NMR (CDCl<sub>3</sub>, 100 MHz) δ: 24.1, 31.1, 55.8, 76.8, 86.0, 99.7, 110.3, 110.4, 117.7, 117.8, 120.9, 127.5, 127.7, 137.0, 137.2, 137.5, 137.6, 152.0, 152.1, 158.5, 159.9; HRMS (ESI-TOF) m/z: Calcd. for C<sub>24</sub>H<sub>22</sub>N<sub>3</sub>O<sub>3</sub> [M+H]<sup>+</sup>: 400.1656; Found: 400.1656.

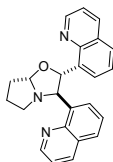

**4d-1:** Light yellow oil; 27.2 mg, yield 37%; <sup>1</sup>H NMR (CDCl<sub>3</sub>, 400 MHz) δ: 1.850-1.87 (m, 1H), 2.13-2.27 (m, 3H), 3.11-3.22 (m, 2H), 5.53-5.55 (m, 2H), 6.21 (d, *J* = 7.6 Hz, 1H), 6.92-6.97 (m, 2H), 7.51-7.60 (m, 4H), 7.84-7.88 (m, 2H), 7.99-8.00 (m, 1H), 8.07-8.08 (m, 1H), 8.15 (d, *J* = 7.2 Hz, 2H); <sup>13</sup>C NMR (CDCl<sub>3</sub>, 100 MHz) δ: 21.8, 29.2, 53.7, 69.1, 80.0, 96.3, 117.8, 117.9, 124.1, 124.2, 124.3, 133.1, 133.2, 136.6, 138.8, 143.8, 144.1, 145.7, 145.9; HRMS (ESI-TOF) m/z: Calcd. for C<sub>24</sub>H<sub>22</sub>N<sub>3</sub>O [M+H]<sup>+</sup>: 368.1757; Found: 368.1760.

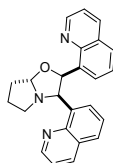

**4d-2:** Light yellow oil; 29.4 mg, yield 40%; <sup>1</sup>H NMR (CDCl<sub>3</sub>, 400 MHz) δ: 1.84-1.89 (m, 1H), 1.97-2.08 (m, 3H), 2.27-2.33 (m, 1H), 3.31-3.37 (m, 1H), 3.48-3.52 (m, 1H), 5.79-5.81 (m, 1H), 6.17 (d, *J* = 6.0 Hz, 1H), 6.75-6.80 (m, 2H), 7.07-7.12 (m, 2H), 7.18-7.21 (m, 1H), 7.29-7.36 (m, 2H), 7.62-7.68 (m, 2H), 7.73-7.76 (m, 1H), 7.86-7.88 (m, 1H), 8.85-8.86 (m, 1H); <sup>13</sup>C NMR (CDCl<sub>3</sub>, 100 MHz) δ: 23.0, 32.1, 54.6, 65.8, 73.7, 96.9, 118.6, 119.1, 123.7, 124.6, 124.8, 125.0, 125.4, 125.8, 125.9, 126.8, 134.0, 134.3, 137.6, 144.4, 145.0, 146.1, 147.5; HRMS (ESI-TOF) m/z: Calcd. for C<sub>24</sub>H<sub>22</sub>N<sub>3</sub>O [M+H]<sup>+</sup>: 368.1757; Found: 368.1758.

## 6. Preparative scale synthesis of two diastereoisomers 3a-1 and 3a-2

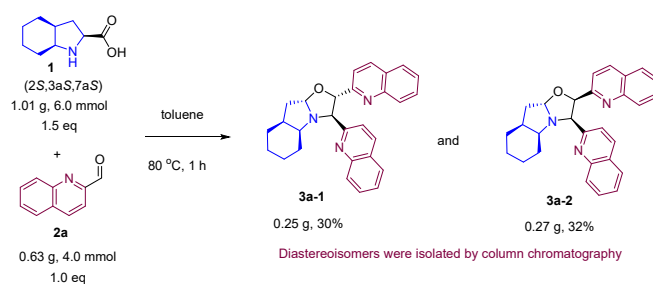

In a sealed tube equipped with a magnetic stirring bar, a mixture of optically pure perhydroindole-2-carboxylic acid **1** (1.01 g, 6.0 mmol, 1.5 eq) and pyridinecarboxaldehyde **2** (0.63 g, 4.0 mmol, 1.0 eq) in 2.0 mL of toluene was stirred at 80 °C for 1 h, and then was directly loaded onto a silica gel and purified by flash chromatography (hexane/EtOAc, 8/1, v/v) to give the desired diastereoisomers **3a-1** (0.25 g, 30%) and **3a-2** (0.27 g, 32%) respectively.

## 7. The further chemical transformations of the compounds **3** into compounds **6**

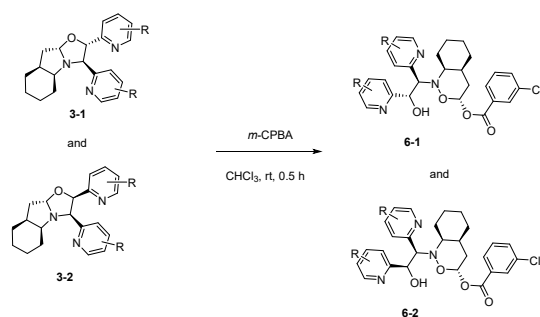

In a sealed tube equipped with a magnetic stirring bar, a mixture of 0.2 mmol of compound **3**, *m*-CPBA (2.0 eq) in 2.0 mL of CHCl<sub>3</sub> was stirred at rt for 0.5 h, and then was directly loaded onto a silica gel and purified by flash chromatography to give the desired product **6**, using hexane/EtOAc (1/2, v/v) as the eluent.

## 8. Characterization data of compounds **6**

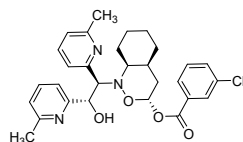

**6a-1**: Light yellow solid; 64.6 mg, yield 62%; <sup>1</sup>H NMR (CDCl<sub>3</sub>, 400 MHz) δ: 1.16-1.21 (m, 4H), 1.28-1.35 (m, 1H), 1.46-1.52 (m, 4H), 2.05-2.13 (m, 1H), 2.15 (s, 3H), 2.35 (s, 3H), 2.59-2.65 (m, 1H), 3.21-3.24 (m, 1H), 4.33 (d, *J* = 6.8 Hz, 1H), 4.54 (br s, 1H), 4.90 (d, *J* = 6.8 Hz, 1H), 6.32 (d, *J* = 4.0 Hz, 1H), 6.79-6.82 (m, 3H), 7.20-7.27 (m, 3H), 7.30-7.34 (m, 1H), 7.44-7.47 (m, 1H), 7.91-7.93 (m, 1H), 7.97 (s, 1H); <sup>13</sup>C NMR (CDCl<sub>3</sub>, 100 MHz) δ: 19.9, 23.7, 24.2, 24.7, 27.5, 29.7, 30.2, 30.3, 61.4, 73.3, 74.4, 94.0, 119.1, 121.7, 122.0, 122.3, 128.0, 129.8, 131.9, 133.2, 134.6, 136.0, 136.1, 156.5, 157.2, 158.0, 158.8, 164.0; HRMS (ESI-TOF) *m/z*: Calcd. for C<sub>29</sub>H<sub>33</sub>ClN<sub>3</sub>O<sub>4</sub> [M+H]<sup>+</sup>: 522.2154 and 524.2125; Found: 522.2151 and 524.2127.

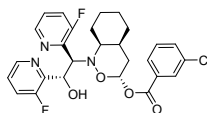

**6b-1:** Light yellow solid; 64.5 mg, yield 61%; <sup>1</sup>H NMR (CDCl<sub>3</sub>, 400 MHz) δ: 1.05-1.13 (m, 1H), 1.18-1.27 (m, 3H), 1.32-1.36 (m, 1H), 1.50-1.59 (m, 4H), 2.09-2.17 (m, 1H), 2.65-2.68 (m, 1H), 3.33-3.37 (m, 1H); <sup>13</sup>C NMR (CDCl<sub>3</sub>, 100 MHz) δ: 18.7, 19.1, 23.9, 26.5, 29.2, 29.6, 61.2, 64.6, 65.2, 94.1, 121.5 (d, *J*<sub>CF</sub> = 20.3 Hz), 121.9 (d, *J*<sub>CF</sub> = 20.2 Hz), 122.8 (d, *J*<sub>CF</sub> = 4.3 Hz), 123.0 (d, *J*<sub>CF</sub> = 4.1 Hz), 126.9, 128.8 (d, *J*<sub>CF</sub> = 5.1 Hz), 130.9, 132.1, 133.5, 143.6 (d, *J*<sub>CF</sub> = 5.1 Hz), 144.1 (d, *J*<sub>CF</sub> = 5.0 Hz), 145.1 (d, *J*<sub>CF</sub> = 13.4 Hz), 145.7 (d, *J*<sub>CF</sub> = 13.1 Hz), 156.2 (d, *J*<sub>CF</sub> = 259.2 Hz), 157.7 (d, *J*<sub>CF</sub> = 257.4 Hz), 163.1; HRMS (ESI-TOF) *m/z*: Calcd. for C<sub>27</sub>H<sub>27</sub>ClF<sub>2</sub>N<sub>3</sub>O<sub>4</sub> [M+H]<sup>+</sup>: 530.1653 and 532.1623; Found: 530.1655 and 532.1620.

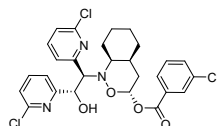

**6c-1:** Light yellow solid; 71.8 mg, yield 64%; <sup>1</sup>H NMR (CDCl<sub>3</sub>, 400 MHz) δ: 0.96-1.03 (m, 1H), 1.10-1.22 (m, 2H), 1.31-1.41 (m, 2H), 1.51-1.56 (m, 4H), 2.08-2.16 (m, 1H), 2.63-2.67 (m, 1H), 3.14-3.19 (m, 1H), 4.14 (d, *J* = 8.4 Hz, 1H), 4.85 (d, *J* = 8.0 Hz, 1H), 6.39 (d, *J* = 3.6 Hz, 1H), 7.00 (d, *J* = 8.0 Hz, 1H), 7.04-7.08 (m, 2H), 7.32-7.37 (m, 2H), 7.44-7.47 (m, 2H), 7.50 (d, *J* = 7.6 Hz, 1H), 7.90-7.94 (m, 1H), 7.99-8.01 (m, 1H); <sup>13</sup>C NMR (CDCl<sub>3</sub>, 100 MHz) δ: 18.7, 20.0, 23.7, 26.4, 29.1, 29.3, 61.2, 72.9, 73.4, 93.1, 119.3, 122.0, 122.2, 126.9, 127.3, 128.8, 128.9, 129.2, 132.4, 132.7, 137.4, 137.8, 148.6, 149.2, 157.7, 159.3, 163.0; HRMS (ESI-TOF) *m/z*: Calcd. for C<sub>27</sub>H<sub>27</sub>Cl<sub>3</sub>N<sub>3</sub>O<sub>4</sub> [M+H]<sup>+</sup>: 562.1062 and 564.1032; Found: 562.1063 and 564.1037.

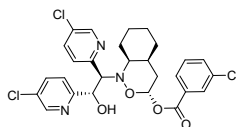

**6d-1:** Light yellow solid; 67.3 mg, yield 60%; <sup>1</sup>H NMR (CDCl<sub>3</sub>, 400 MHz) δ: 0.96-1.03 (m, 2H), 1.16-1.24 (m, 1H), 1.31-1.35 (m, 2H), 1.50-1.57 (m, 4H), 2.07-2.15 (m, 1H), 2.64-2.67 (m, 1H), 3.14-3.19 (m, 1H), 4.23 (d, *J* = 8.4 Hz, 1H), 4.85 (d, *J* = 8.4 Hz, 1H), 6.40 (d, *J* = 4.0 Hz, 1H), 7.00 (d, *J* = 8.4 Hz, 1H), 7.31-7.38 (m, 2H), 7.45-7.49 (m, 3H), 7.93 (d, *J* = 8.0 Hz, 1H), 8.00-8.01 (m, 1H), 8.12 (d, *J* = 2.0 Hz, 1H), 8.26 (d, *J* = 2.4 Hz, 1H); <sup>13</sup>C NMR (CDCl<sub>3</sub>, 100 MHz) δ: 18.6,

19.8, 23.7, 26.4, 29.1, 29.4, 61.3, 72.8, 73.3, 93.2, 122.1, 125.2, 126.9, 128.8, 128.9, 129.8, 130.1, 130.6, 132.4, 133.7, 134.6, 134.9, 146.2, 146.7, 154.9, 156.4, 163.0; HRMS (ESI-TOF) *m/z*: Calcd. for C<sub>27</sub>H<sub>27</sub>Cl<sub>3</sub>N<sub>3</sub>O<sub>4</sub> [M+H]<sup>+</sup>: 562.1062 and 564.1032; Found: 562.1065 and 564.1026.

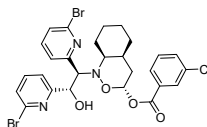

**6e-1**: Light yellow solid; 73.9 mg, yield 57%; <sup>1</sup>H NMR (CDCl<sub>3</sub>, 400 MHz)  $\delta$ : 0.96-1.03 (m, 1H), 1.12-1.22 (m, 2H), 1.30-1.42 (m, 2H), 1.51-1.55 (m, 4H), 2.07-2.15 (m, 1H), 2.63-2.66 (m, 1H), 3.13-3.18 (m, 1H), 4.12 (d, *J* = 8.0 Hz, 1H), 4.84 (d, *J* = 8.0 Hz, 1H), 6.38 (d, *J* = 3.6 Hz, 1H), 7.11-7.15 (m, 2H), 7.20 (d, *J* = 8.0 Hz, 1H), 7.25 (d, *J* = 8.0 Hz, 1H), 7.30-7.35 (m, 2H), 7.44-7.48 (m, 1H), 7.53 (d, *J* = 7.6 Hz, 1H), 7.91-7.94 (m, 1H), 7.98-7.99 (m, 1H); <sup>13</sup>C NMR (CDCl<sub>3</sub>, 100 MHz)  $\delta$ : 18.7, 20.0, 23.7, 26.5, 29.1, 29.3, 61.1, 72.9, 73.3, 93.1, 119.5, 123.7, 125.8, 126.0, 126.9, 128.8, 128.9, 130.6, 132.4, 133.7, 137.0, 137.5, 139.1, 139.7, 158.3, 159.9, 163.0; HRMS (ESI-TOF) *m/z*: Calcd. for C<sub>27</sub>H<sub>27</sub>Br<sub>2</sub>ClN<sub>3</sub>O<sub>4</sub> [M+H]<sup>+</sup>: 650.0051 and 652.0031; Found: 650.0051 and 652.0027.

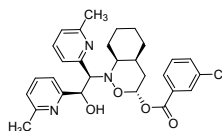

**6a-2**: Light yellow solid; 61.5 mg, yield 59%; <sup>1</sup>H NMR (CDCl<sub>3</sub>, 400 MHz)  $\delta$ : 1.25-1.37 (m, 2H), 1.43-1.47 (m, 2H), 1.56-1.59 (m, 1H), 1.63-1.69 (m, 1H), 1.78 (s, 3H), 1.79-1.82 (m, 1H), 1.84-1.92 (m, 1H), 2.01-2.14 (m, 2H), 2.36 (s, 3H), 2.72-2.74 (m, 1H), 3.60-3.63 (m, 1H), 4.37 (d, *J* = 2.8 Hz, 1H), 5.19 (d, *J* = 2.8 Hz, 1H), 6.03 (d, *J* = 4.0 Hz, 1H), 6.63 (d, *J* = 7.6 Hz, 1H), 6.73 (d, *J* = 7.6 Hz, 1H), 6.78 (d, *J* = 7.6 Hz, 1H), 7.08-7.12 (m, 1H), 7.17-7.21 (m, 1H), 7.29-7.34 (m, 1H), 7.44-7.47 (m, 1H), 7.77-7.80 (m, 1H), 7.82-7.83 (m, 1H); <sup>13</sup>C NMR (CDCl<sub>3</sub>, 100 MHz)  $\delta$ : 17.2, 19.3, 22.1, 22.9, 23.9, 26.4, 28.6, 29.3, 56.9, 66.7, 71.9, 92.3, 116.9, 120.3, 120.6, 121.4, 127.0, 128.5, 128.8, 131.3, 131.7, 133.3, 135.1, 135.4, 155.0, 155.6, 157.1, 159.7, 162.4; HRMS (ESI-TOF) *m/z*: Calcd. for C<sub>29</sub>H<sub>32</sub>ClN<sub>3</sub>NaO<sub>4</sub> [M+Na]<sup>+</sup>: 544.1974 and 546.1944; Found: 544.1969 and 546.1953.

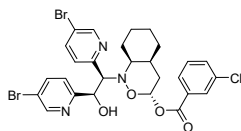

**6f-2:** Light yellow solid; 82.9 mg, yield 64%;  $^1\text{H}$  NMR ( $\text{CDCl}_3$ , 400 MHz)  $\delta$ : 1.25-1.38 (m, 2H), 1.45-1.52 (m, 2H), 1.58-1.69 (m, 2H), 1.81-1.92 (m, 3H), 2.06-2.14 (m, 1H), 2.69-2.71 (m, 1H), 3.55-3.59 (m, 1H), 4.00 (d,  $J = 2.8$  Hz, 1H), 5.15 (d,  $J = 2.8$  Hz, 1H), 6.02 (d,  $J = 4.0$  Hz, 1H), 6.73 (d,  $J = 8.4$  Hz, 1H), 6.96 (d,  $J = 8.4$  Hz, 1H), 7.33-7.37 (m, 2H), 7.46-7.52 (m, 2H), 7.65 (d,  $J = 2.0$  Hz, 1H), 7.75-7.79 (m, 1H), 7.85-7.86 (m, 1H);  $^{13}\text{C}$  NMR ( $\text{CDCl}_3$ , 100 MHz)  $\delta$ : 17.5, 19.3, 23.8, 26.4, 28.7, 29.2, 57.0, 66.0, 71.5, 92.3, 117.8, 118.2, 121.2, 125.6, 127.1, 128.6, 128.9, 131.0, 132.0, 133.4, 137.5, 138.0, 147.7, 148.3, 156.2, 158.8, 162.5; HRMS (ESI-TOF)  $m/z$ : Calcd. for  $\text{C}_{27}\text{H}_{27}\text{Br}_2\text{ClN}_3\text{O}_4$   $[\text{M}+\text{H}]^+$ : 650.0051 and 652.0031; Found: 650.0053 and 652.0035.

## 9. Figure S1: reaction solution detected by ESI-MS analysis.

Item name: L-WYH-7aa  
Item description:

Channel name: 1: Average Time 0.2063 min : TOF MS (50-1500) ESI+ : Centroided : Combined

1.11e8

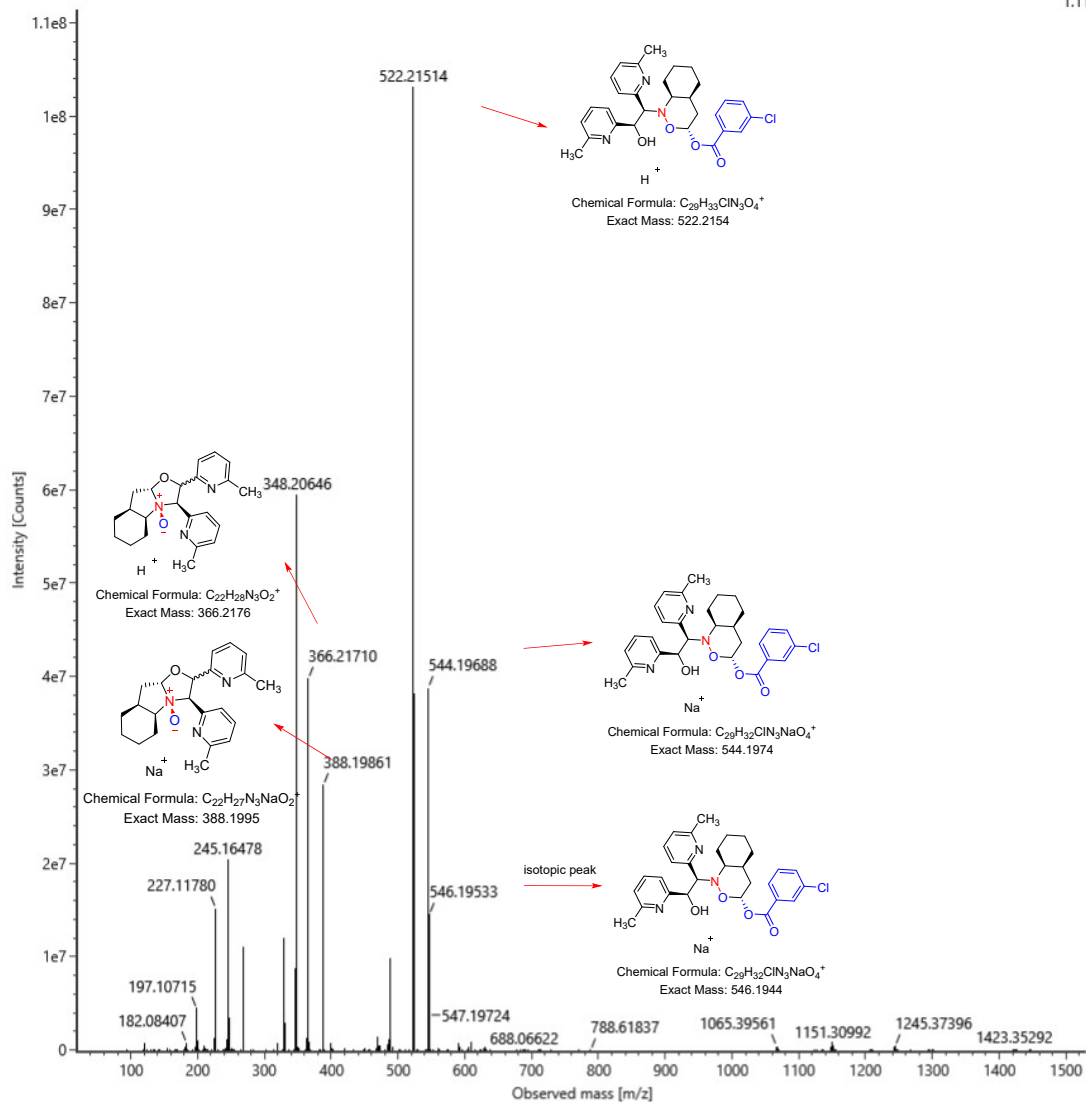



## 10. X-ray crystal data for compounds 3b-2, 3g-2, 4d-1 and 6c-1

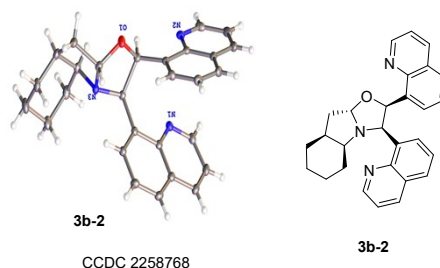

**Table S1 Crystal data and structure refinement for 3b-2**

|                                             |                                                               |
|---------------------------------------------|---------------------------------------------------------------|
| Identification code                         | <b>3b-2</b>                                                   |
| Empirical formula                           | C <sub>28</sub> H <sub>27</sub> N <sub>3</sub> O              |
| Formula weight                              | 421.52                                                        |
| Temperature/K                               | 99.95(19)                                                     |
| Crystal system                              | monoclinic                                                    |
| Space group                                 | P2 <sub>1</sub>                                               |
| a/Å, b/Å, c/Å                               | 7.5239(7), 9.0245(8), 16.1748(14)                             |
| α/°, β/°, γ/°                               | 90, 90.02(2), 90                                              |
| Volume/Å <sup>3</sup>                       | 1098.26(17)                                                   |
| Z                                           | 2                                                             |
| ρ <sub>calc</sub> /cm <sup>3</sup>          | 1.275                                                         |
| μ/mm <sup>-1</sup>                          | 0.611                                                         |
| F(000)                                      | 448.0                                                         |
| Radiation                                   | Cu Kα (λ = 1.54184)                                           |
| Crystal size/mm <sup>3</sup>                | 0.14 × 0.12 × 0.11                                            |
| 2θ range for data collection/°              | 5.464 to 144.366                                              |
| Index ranges                                | -9 ≤ h ≤ 8, -10 ≤ k ≤ 10, -19 ≤ l ≤ 14                        |
| Reflections collected                       | 11455                                                         |
| Independent reflections                     | 3946 [R <sub>int</sub> = 0.0312, R <sub>sigma</sub> = 0.0302] |
| Data/restraints/parameters                  | 3946/1/289                                                    |
| Goodness-of-fit on F <sup>2</sup>           | 1.077                                                         |
| Final R indexes [I >= 2σ(I)]                | R <sub>1</sub> = 0.0331, wR <sub>2</sub> = 0.0871             |
| Final R indexes [all data]                  | R <sub>1</sub> = 0.0344, wR <sub>2</sub> = 0.0880             |
| Largest diff. peak/hole / e Å <sup>-3</sup> | 0.39/-0.23                                                    |
| Flack parameter                             | -0.03(12)/-0.01(12)                                           |

**Crystal Data** for C<sub>28</sub>H<sub>27</sub>N<sub>3</sub>O (*M* = 421.52 g/mol): monoclinic, space group P2<sub>1</sub> (no. 4), *a* = 7.5239(7) Å, *b* = 9.0245(8) Å, *c* = 16.1748(14) Å, β = 90.02(2)°, *V* = 1098.26(17) Å<sup>3</sup>, *Z* = 2, *T* = 99.95(19) K, μ(Cu Kα) = 0.611 mm<sup>-1</sup>, *D*<sub>calc</sub> = 1.275 g/cm<sup>3</sup>, 11455 reflections measured (5.464° ≤ 2θ ≤ 144.366°), 3946 unique (*R*<sub>int</sub> = 0.0312, *R*<sub>sigma</sub> = 0.0302) which were used in all calculations. The final *R*<sub>1</sub> was 0.0331 (*I* > 2σ(*I*)) and *wR*<sub>2</sub> was 0.0880 (all data).

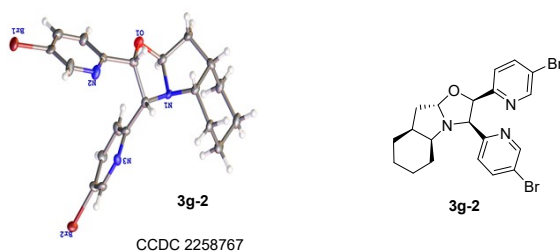

**Table S2 Crystal data and structure refinement for 3g-2**

|                                             |                                                                  |
|---------------------------------------------|------------------------------------------------------------------|
| Identification code                         | <b>3g-2</b>                                                      |
| Empirical formula                           | C <sub>20</sub> H <sub>21</sub> Br <sub>2</sub> N <sub>3</sub> O |
| Formula weight                              | 479.22                                                           |
| Temperature/K                               | 169.99(10)                                                       |
| Crystal system                              | monoclinic                                                       |
| Space group                                 | P2 <sub>1</sub>                                                  |
| a/Å, b/Å, c/Å                               | 6.02540(14), 17.1860(4), 9.4103(2)                               |
| α/°, β/°, γ/°                               | 90, 99.742(2), 90                                                |
| Volume/Å <sup>3</sup>                       | 960.41(4)                                                        |
| Z                                           | 2                                                                |
| ρ <sub>calc</sub> /cm <sup>3</sup>          | 1.657                                                            |
| μ/mm <sup>-1</sup>                          | 5.463                                                            |
| F(000)                                      | 480.0                                                            |
| Radiation                                   | Cu Kα (λ = 1.54184)                                              |
| Crystal size/mm <sup>3</sup>                | 0.16 × 0.13 × 0.12                                               |
| 2θ range for data collection/°              | 9.536 to 147.002                                                 |
| Index ranges                                | -7 ≤ h ≤ 6, -20 ≤ k ≤ 14, -11 ≤ l ≤ 11                           |
| Reflections collected                       | 4451                                                             |
| Independent reflections                     | 2900 [R <sub>int</sub> = 0.0706, R <sub>sigma</sub> = 0.0603]    |
| Data/restraints/parameters                  | 2900/1/235                                                       |
| Goodness-of-fit on F <sup>2</sup>           | 1.186                                                            |
| Final R indexes [I >= 2σ (I)]               | R <sub>1</sub> = 0.0868, wR <sub>2</sub> = 0.2504                |
| Final R indexes [all data]                  | R <sub>1</sub> = 0.0883, wR <sub>2</sub> = 0.2544                |
| Largest diff. peak/hole / e Å <sup>-3</sup> | 1.71/-2.42                                                       |
| Flack parameter                             | -0.09(5)/-0.053(15)                                              |

**Crystal Data** for C<sub>20</sub>H<sub>21</sub>Br<sub>2</sub>N<sub>3</sub>O (*M* = 479.22 g/mol): monoclinic, space group P2<sub>1</sub> (no. 4), *a* = 6.02540(14) Å, *b* = 17.1860(4) Å, *c* = 9.4103(2) Å, β = 99.742(2)°, *V* = 960.41(4) Å<sup>3</sup>, *Z* = 2, *T* = 169.99(10) K, μ(Cu Kα) = 5.463 mm<sup>-1</sup>, *D*<sub>calc</sub> = 1.657 g/cm<sup>3</sup>, 4451 reflections measured (9.536° ≤ 2θ ≤ 147.002°), 2900 unique (*R*<sub>int</sub> = 0.0706, *R*<sub>sigma</sub> = 0.0603) which were used in all calculations. The final *R*<sub>1</sub> was 0.0868 (*I* > 2σ(*I*)) and *wR*<sub>2</sub> was 0.2544 (all data).

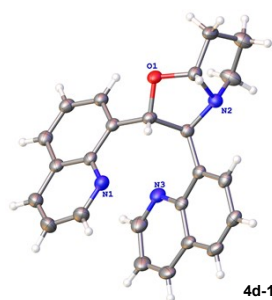

CCDC 2258770

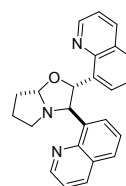

4d-1

**Table S3 Crystal data and structure refinement for 4d-1**

|                                             |                                                               |
|---------------------------------------------|---------------------------------------------------------------|
| Identification code                         | <b>4d-1</b>                                                   |
| Empirical formula                           | C <sub>24</sub> H <sub>21</sub> N <sub>3</sub> O              |
| Formula weight                              | 367.44                                                        |
| Temperature/K                               | 170.00(10)                                                    |
| Crystal system                              | orthorhombic                                                  |
| Space group                                 | Pccn                                                          |
| a/Å, b/Å, c/Å                               | 21.3764(18), 11.6397(10), 15.2354(10)                         |
| α/°, β/°, γ/°                               | 90, 90, 90                                                    |
| Volume/Å <sup>3</sup>                       | 3790.8(5)                                                     |
| Z                                           | 8                                                             |
| ρ <sub>calc</sub> /cm <sup>3</sup>          | 1.288                                                         |
| μ/mm <sup>-1</sup>                          | 0.632                                                         |
| F(000)                                      | 1552.0                                                        |
| Radiation                                   | Cu Kα (λ = 1.54184)                                           |
| Crystal size/mm <sup>3</sup>                | 0.13 × 0.12 × 0.11                                            |
| 2θ range for data collection/°              | 8.272 to 144.2                                                |
| Index ranges                                | -23 ≤ h ≤ 26, -13 ≤ k ≤ 11, -18 ≤ l ≤ 15                      |
| Reflections collected                       | 18443                                                         |
| Independent reflections                     | 3680 [R <sub>int</sub> = 0.1115, R <sub>sigma</sub> = 0.1137] |
| Data/restraints/parameters                  | 3680/0/253                                                    |
| Goodness-of-fit on F <sup>2</sup>           | 1.037                                                         |
| Final R indexes [I >= 2σ(I)]                | R <sub>1</sub> = 0.1003, wR <sub>2</sub> = 0.2458             |
| Final R indexes [all data]                  | R <sub>1</sub> = 0.1320, wR <sub>2</sub> = 0.2740             |
| Largest diff. peak/hole / e Å <sup>-3</sup> | 0.46/-0.27                                                    |

**Crystal Data** for C<sub>24</sub>H<sub>21</sub>N<sub>3</sub>O (*M* = 367.44 g/mol): orthorhombic, space group Pccn (no. 56), *a* = 21.3764(18) Å, *b* = 11.6397(10) Å, *c* = 15.2354(10) Å, *V* = 3790.8(5) Å<sup>3</sup>, *Z* = 8, *T* = 170.00(10) K, μ(Cu Kα) = 0.632 mm<sup>-1</sup>, *D*<sub>calc</sub> = 1.288 g/cm<sup>3</sup>, 18443 reflections measured (8.272° ≤ 2θ ≤ 144.2°), 3680 unique (*R*<sub>int</sub> = 0.1115, *R*<sub>sigma</sub> = 0.1137) which were used in all calculations. The final *R*<sub>1</sub> was 0.1003 (*I* > 2σ(*I*)) and *wR*<sub>2</sub> was 0.2740 (all data).

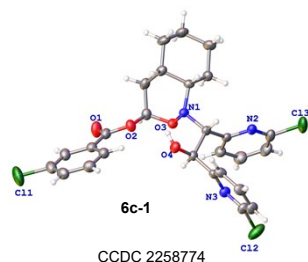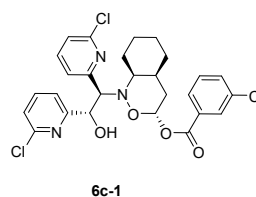

**Table S4 Crystal data and structure refinement for 6c-1**

|                                             |                                                                               |
|---------------------------------------------|-------------------------------------------------------------------------------|
| Identification code                         | <b>6c-1</b>                                                                   |
| Empirical formula                           | C <sub>27</sub> H <sub>26</sub> Cl <sub>3</sub> N <sub>3</sub> O <sub>4</sub> |
| Formula weight                              | 562.86                                                                        |
| Temperature/K                               | 169.98(10)                                                                    |
| Crystal system                              | orthorhombic                                                                  |
| Space group                                 | P2 <sub>1</sub> 2 <sub>1</sub> 2 <sub>1</sub>                                 |
| a/Å, b/Å, c/Å                               | 6.0111(2), 12.8027(4), 34.2524(12)                                            |
| α/°, β/°, γ/°                               | 90, 90, 90                                                                    |
| Volume/Å <sup>3</sup>                       | 2636.01(15)                                                                   |
| Z                                           | 4                                                                             |
| ρ <sub>calc</sub> /cm <sup>3</sup>          | 1.418                                                                         |
| μ/mm <sup>-1</sup>                          | 3.475                                                                         |
| F(000)                                      | 1168.0                                                                        |
| Radiation                                   | Cu Kα (λ = 1.54184)                                                           |
| Crystal size/mm <sup>3</sup>                | 0.13 × 0.1 × 0.08                                                             |
| 2θ range for data collection/°              | 5.16 to 147.44                                                                |
| Index ranges                                | -5 ≤ h ≤ 7, -15 ≤ k ≤ 15, -42 ≤ l ≤ 41                                        |
| Reflections collected                       | 10170                                                                         |
| Independent reflections                     | 5202 [R <sub>int</sub> = 0.0374, R <sub>sigma</sub> = 0.0540]                 |
| Data/restraints/parameters                  | 5202/0/336                                                                    |
| Goodness-of-fit on F <sup>2</sup>           | 1.027                                                                         |
| Final R indexes [I ≥ 2σ(I)]                 | R <sub>1</sub> = 0.0424, wR <sub>2</sub> = 0.1013                             |
| Final R indexes [all data]                  | R <sub>1</sub> = 0.0481, wR <sub>2</sub> = 0.1060                             |
| Largest diff. peak/hole / e Å <sup>-3</sup> | 0.21/-0.21                                                                    |
| Flack parameter                             | -0.004(11)/-0.001(10)                                                         |

**Crystal Data** for C<sub>27</sub>H<sub>26</sub>Cl<sub>3</sub>N<sub>3</sub>O<sub>4</sub> (*M* = 562.86 g/mol): orthorhombic, space group P2<sub>1</sub>2<sub>1</sub>2<sub>1</sub> (no. 19), *a* = 6.0111(2) Å, *b* = 12.8027(4) Å, *c* = 34.2524(12) Å, *V* = 2636.01(15) Å<sup>3</sup>, *Z* = 4, *T* = 169.98(10) K, μ(Cu Kα) = 3.475 mm<sup>-1</sup>, *D*<sub>calc</sub> = 1.418 g/cm<sup>3</sup>, 10170 reflections measured (5.16° ≤ 2θ ≤ 147.44°), 5202 unique (*R*<sub>int</sub> = 0.0374, *R*<sub>sigma</sub> = 0.0540) which were used in all calculations. The final *R*<sub>1</sub> was 0.0424 (*I* > 2σ(*I*)) and *wR*<sub>2</sub> was 0.1060 (all data).

# 11. The copies of $^1\text{H}$ NMR and $^{13}\text{C}$ NMR spectra for compounds 3, 4 and 6

## $^1\text{H}$ and $^{13}\text{C}$ NMR of 3a-1

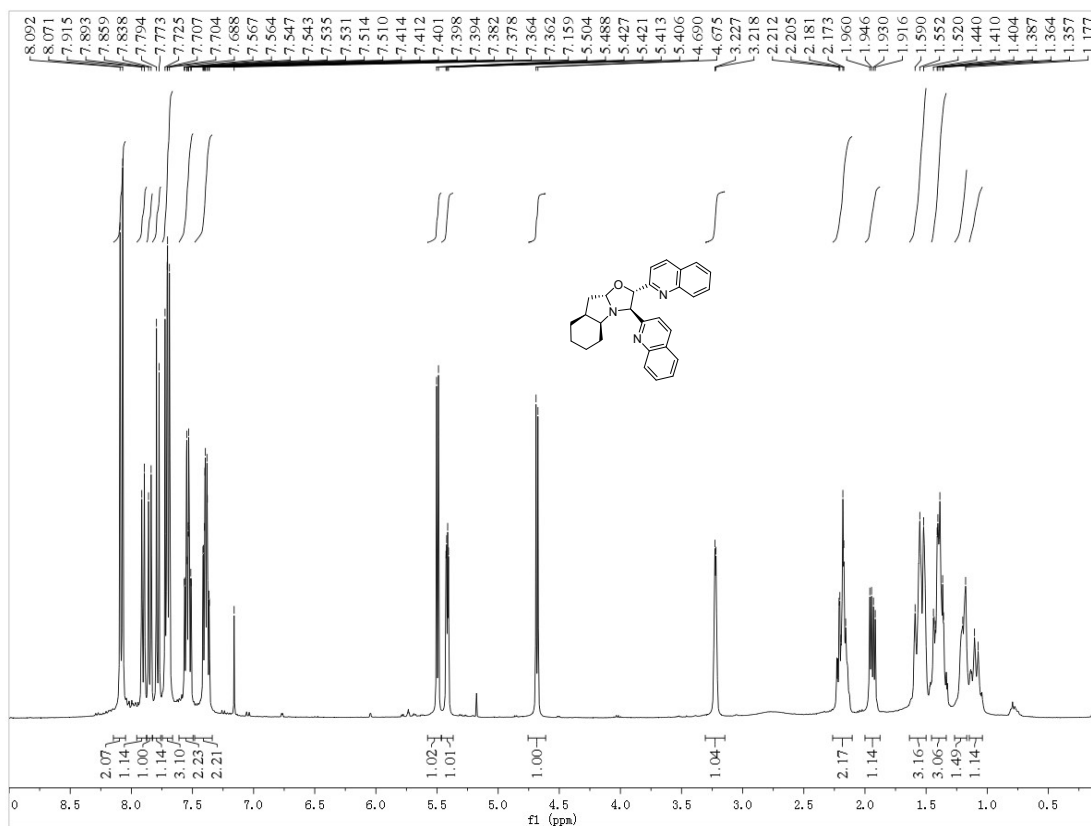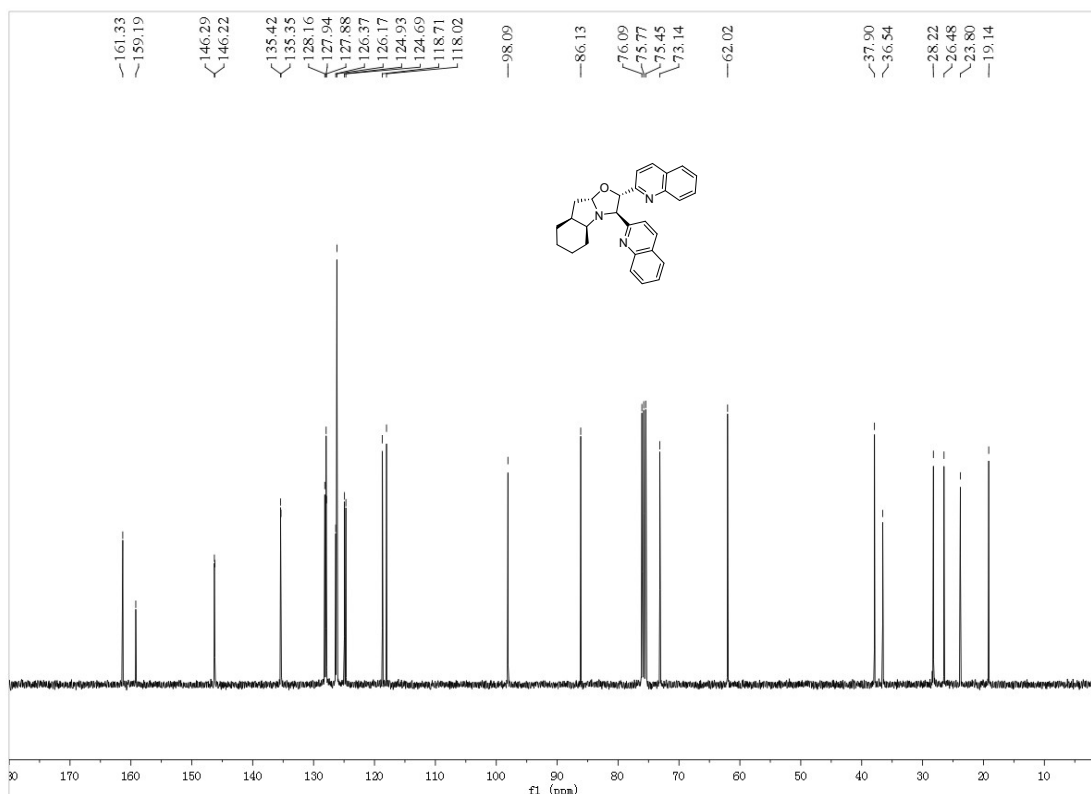

# <sup>1</sup>H and <sup>13</sup>C NMR of 3a-2

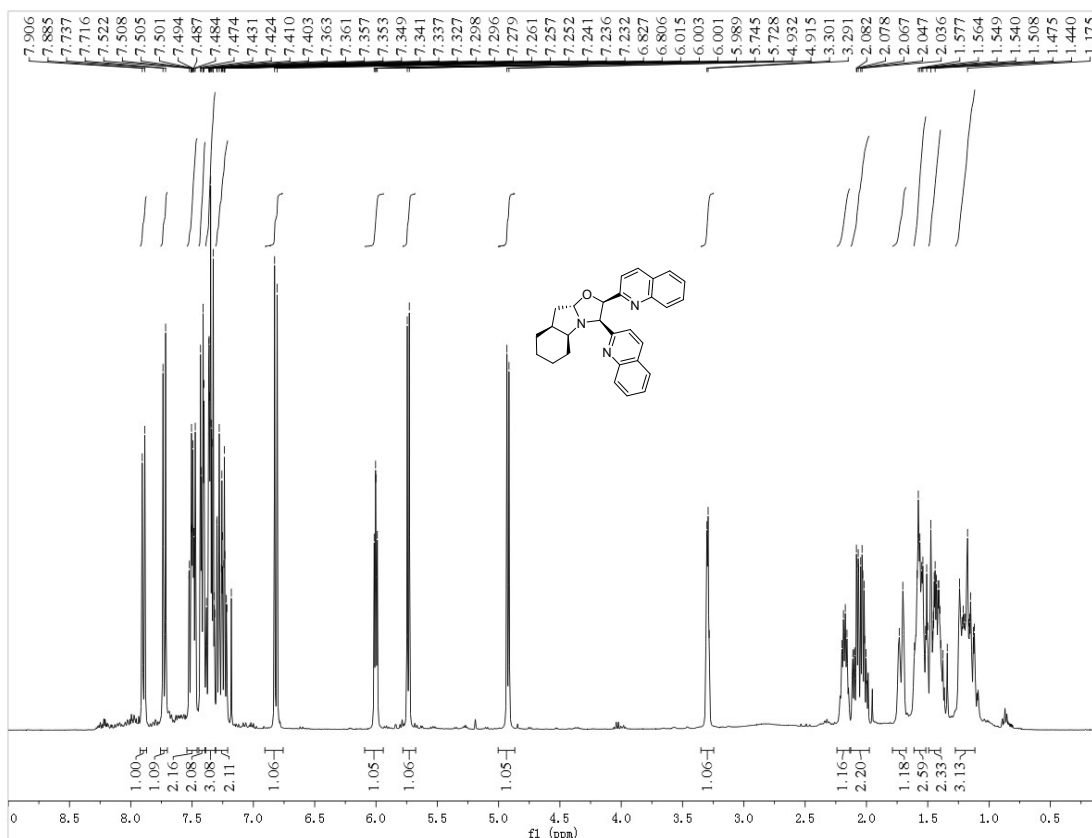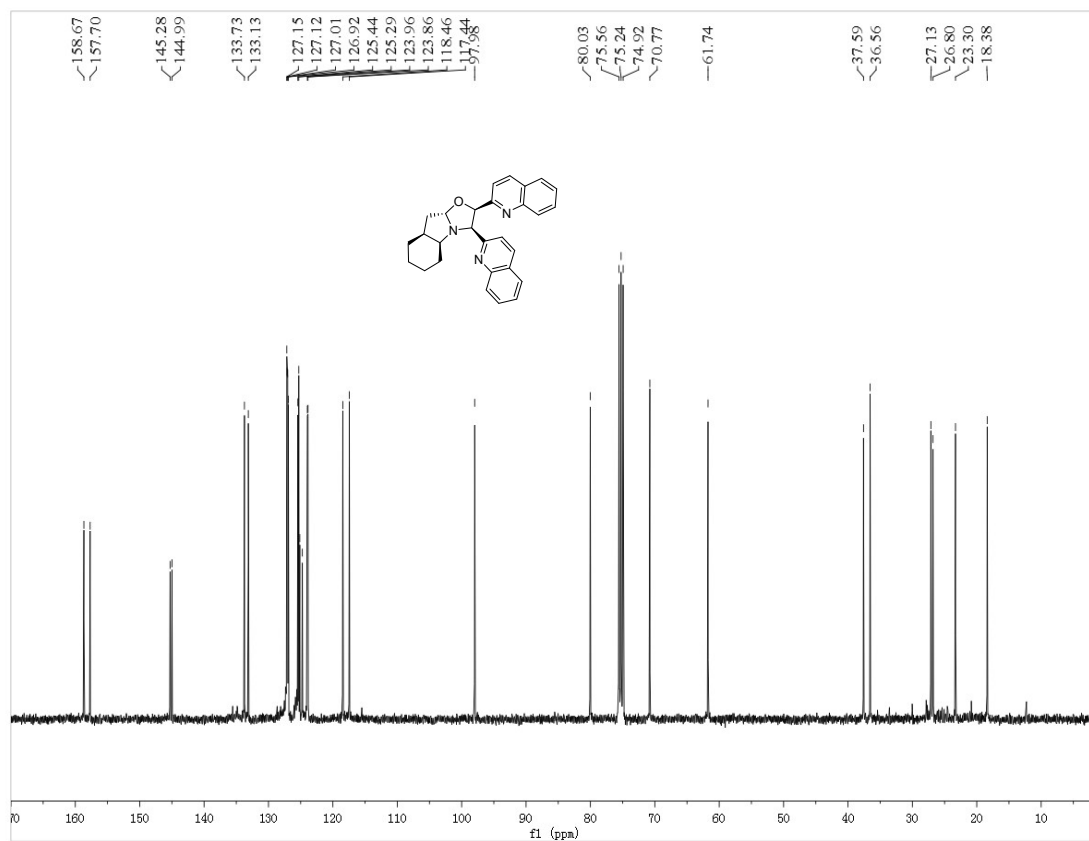

# <sup>1</sup>H and <sup>13</sup>C NMR of 3b-1

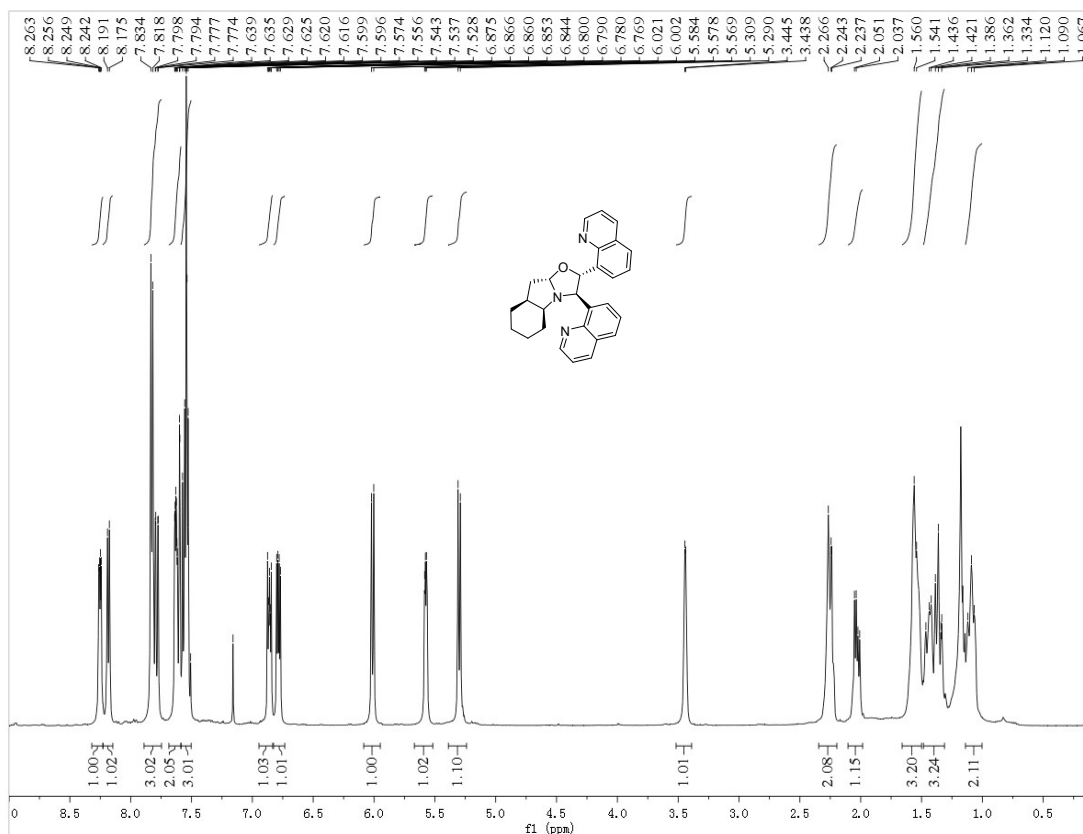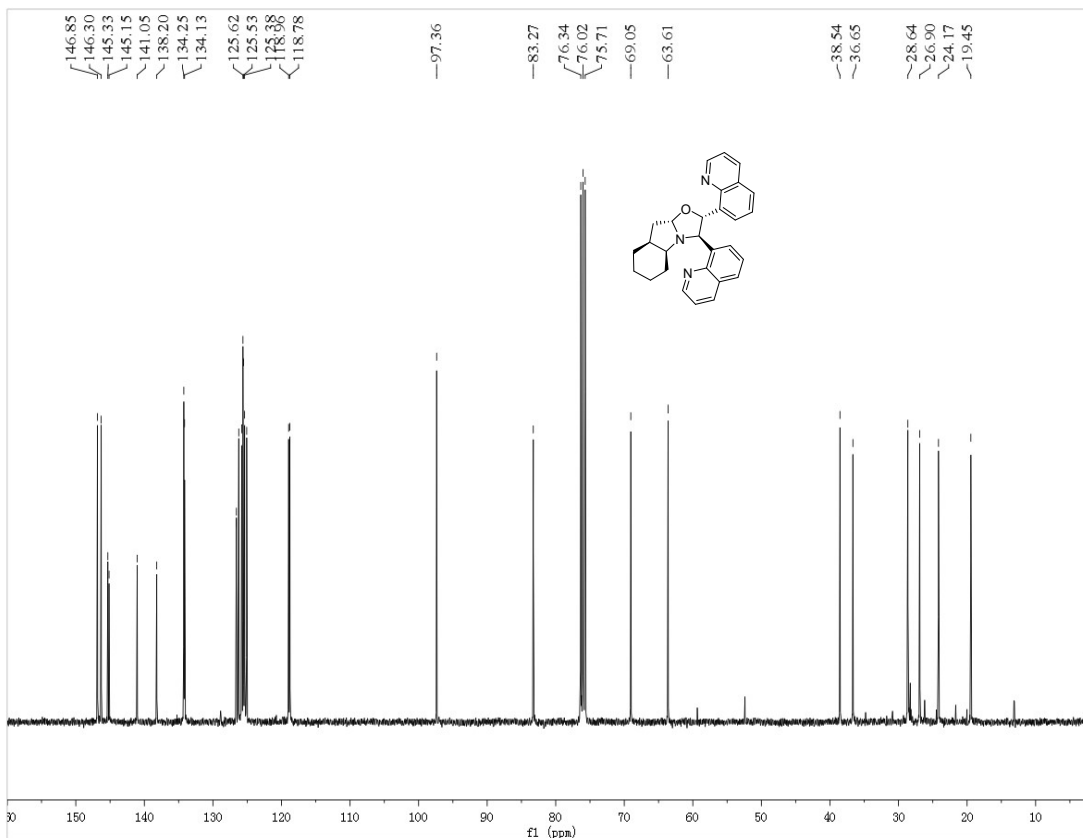

# <sup>1</sup>H and <sup>13</sup>C NMR of 3b-2

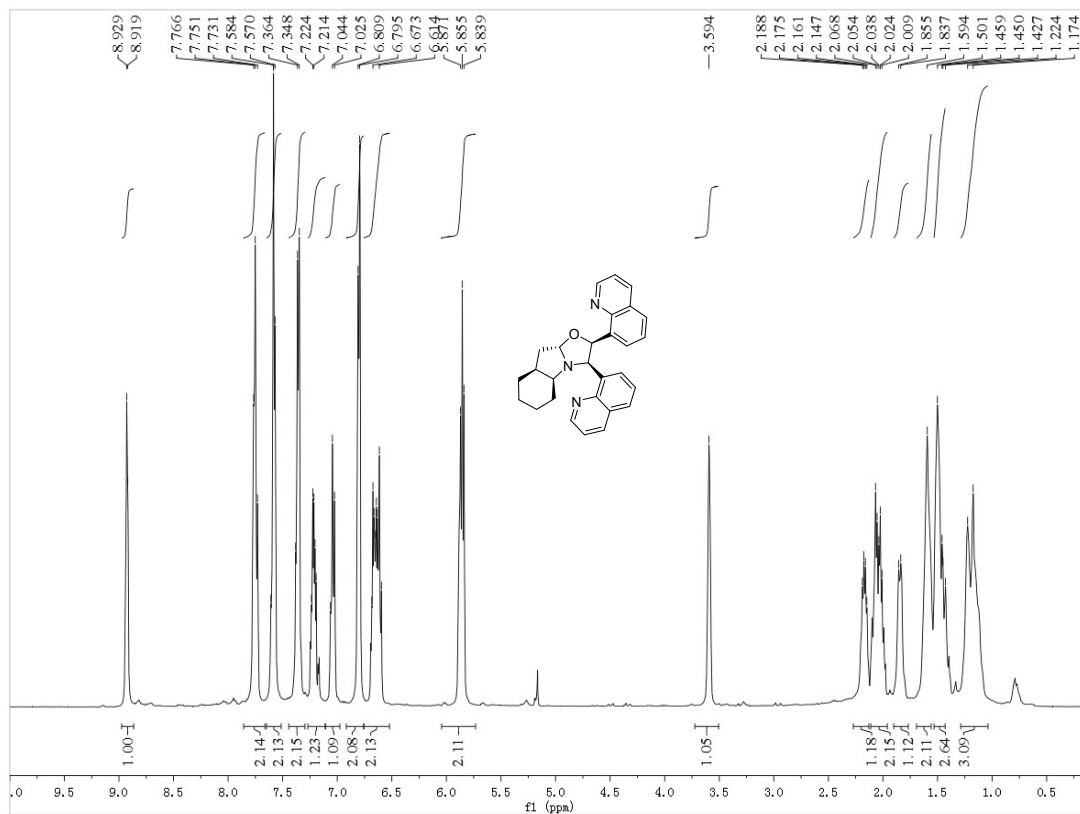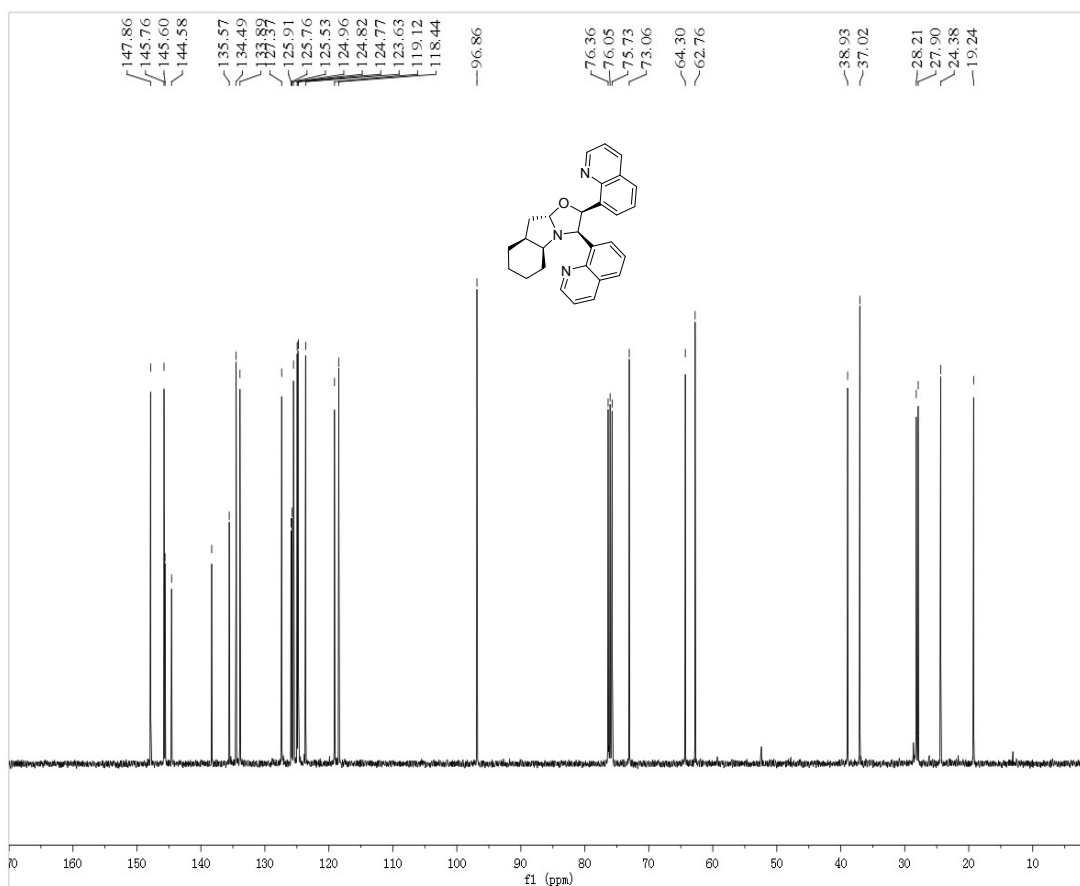



# <sup>1</sup>H and <sup>13</sup>C NMR of 3c

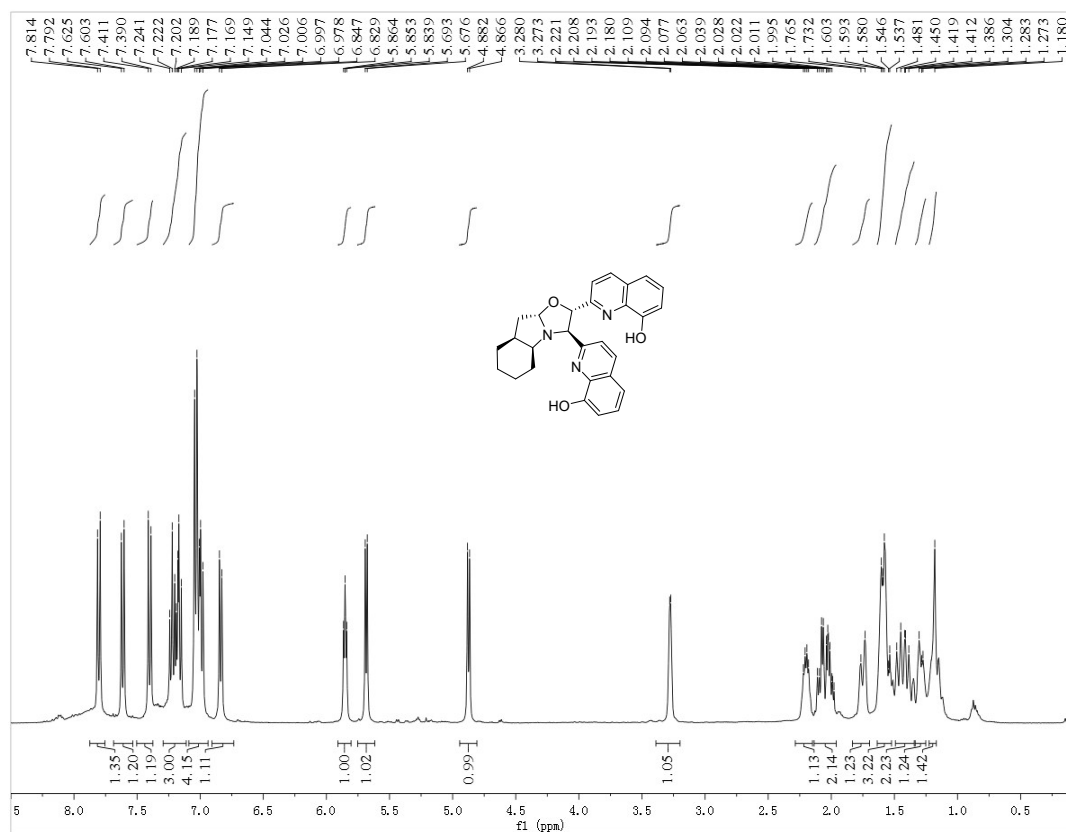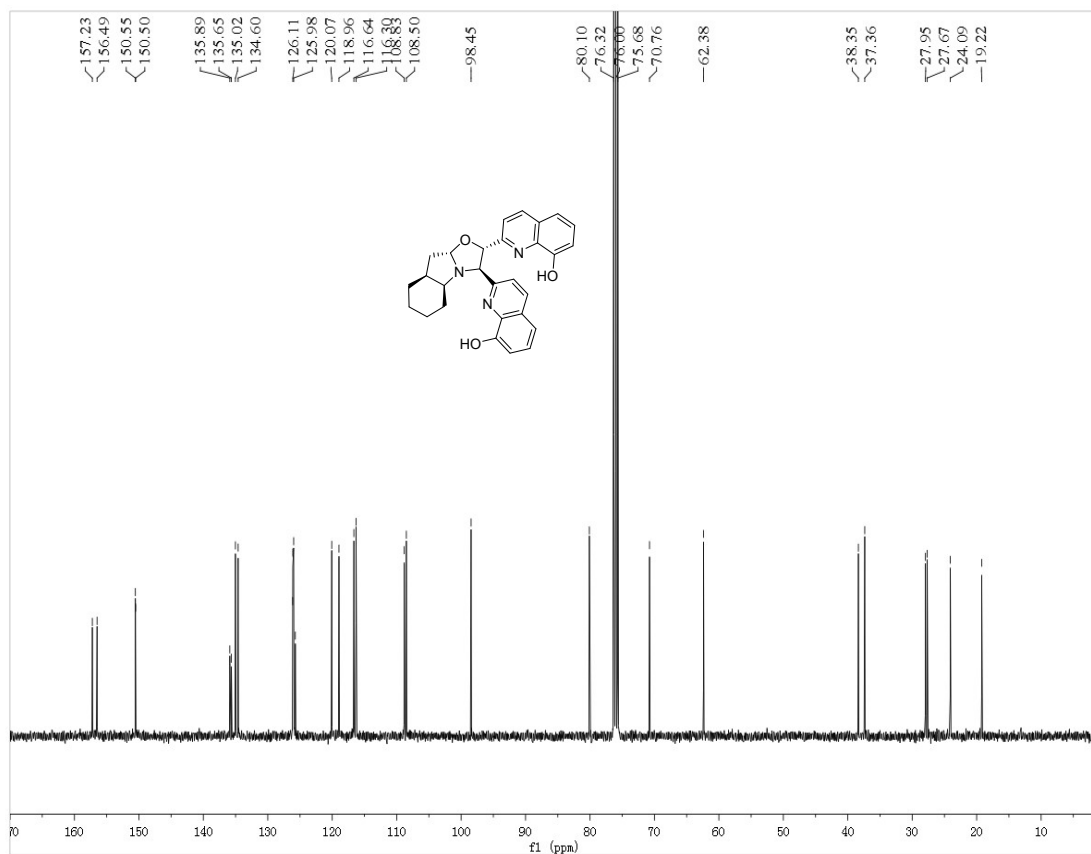

# <sup>1</sup>H and <sup>13</sup>C NMR of 3d

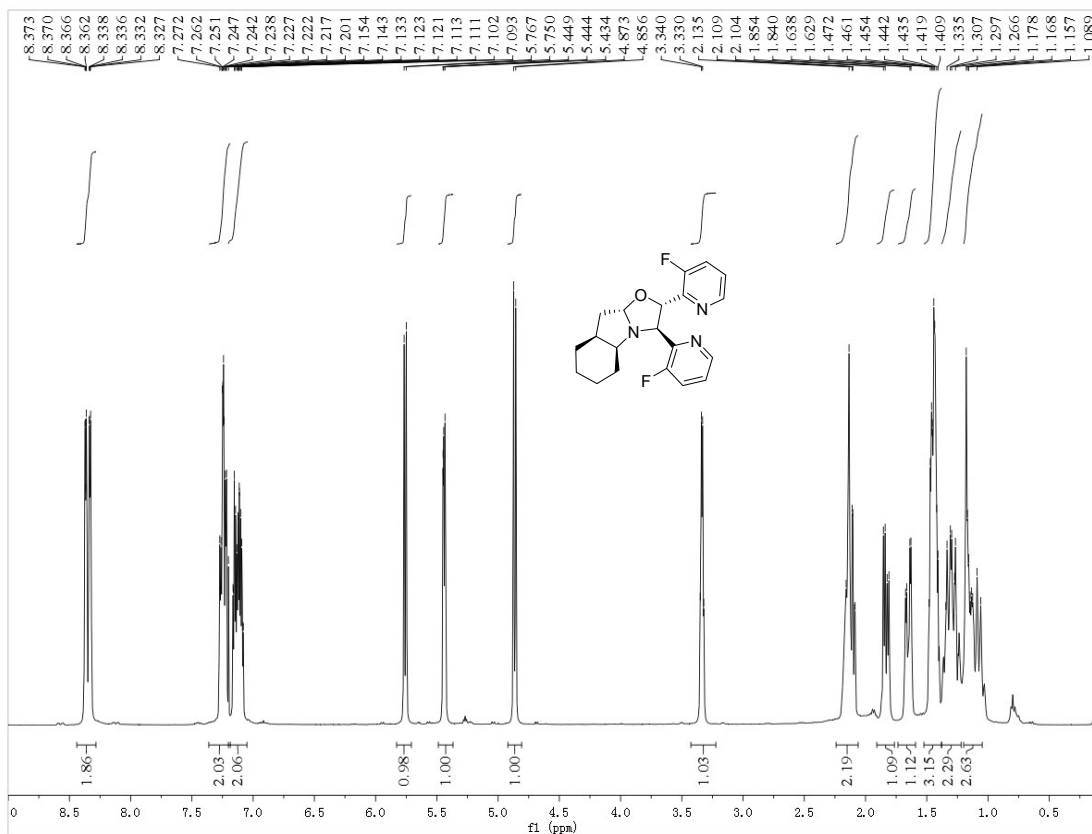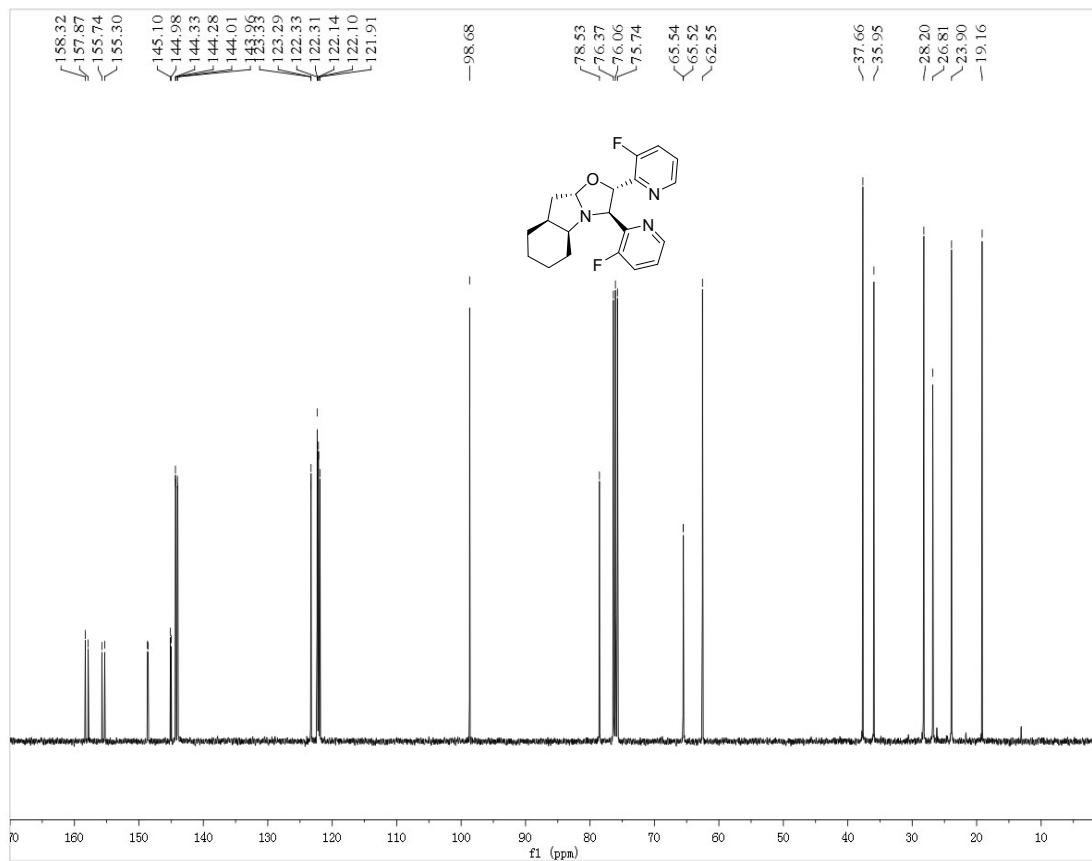

# <sup>1</sup>H and <sup>13</sup>C NMR of 3e-1

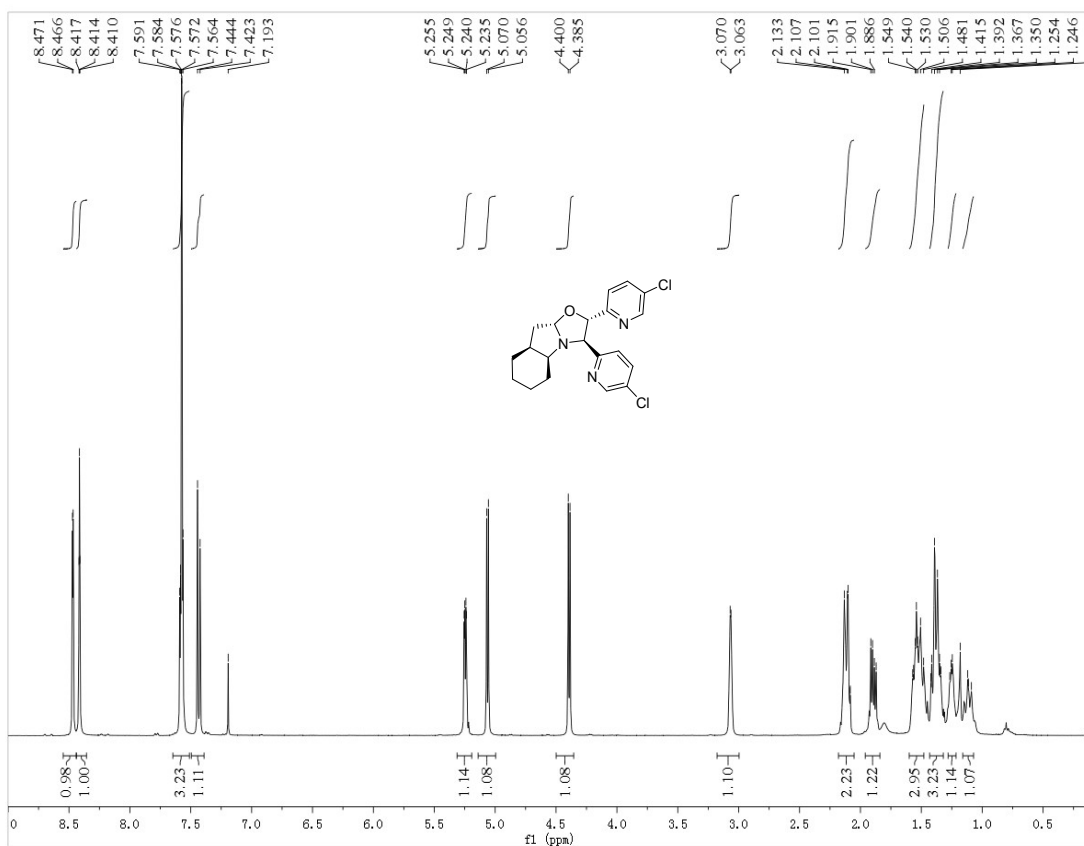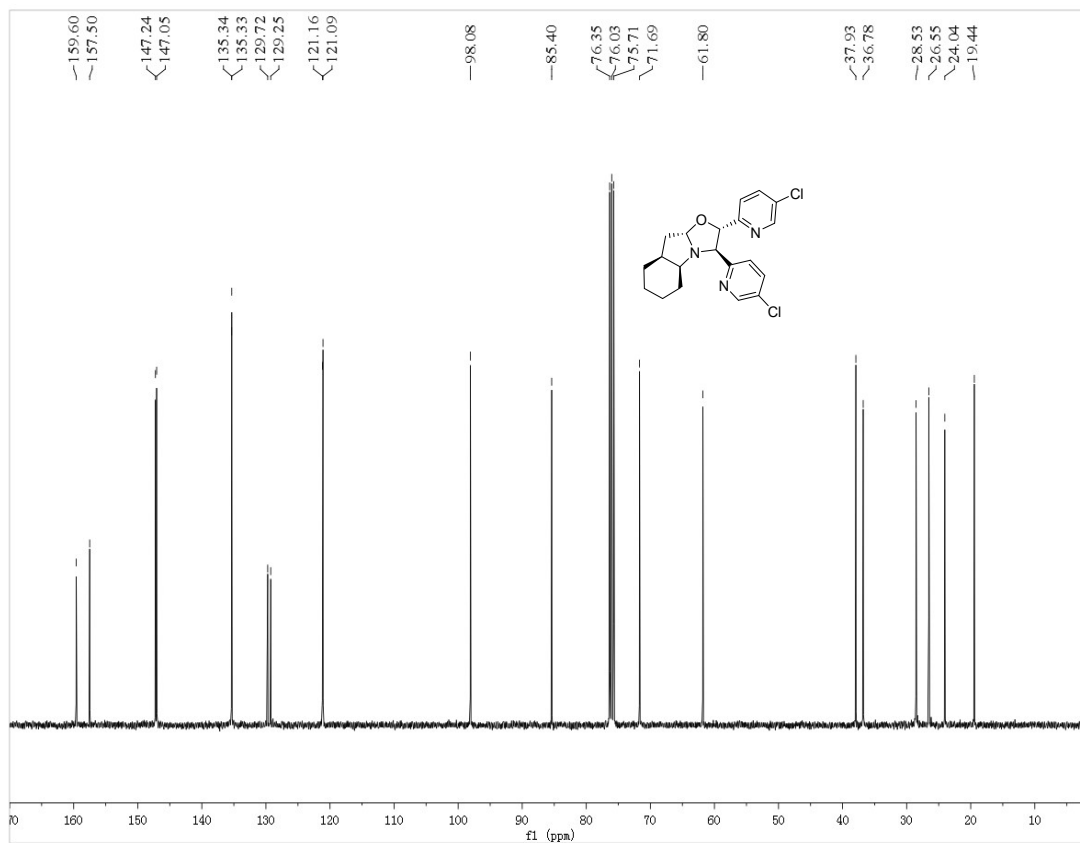

# <sup>1</sup>H and <sup>13</sup>C NMR of 3e-2

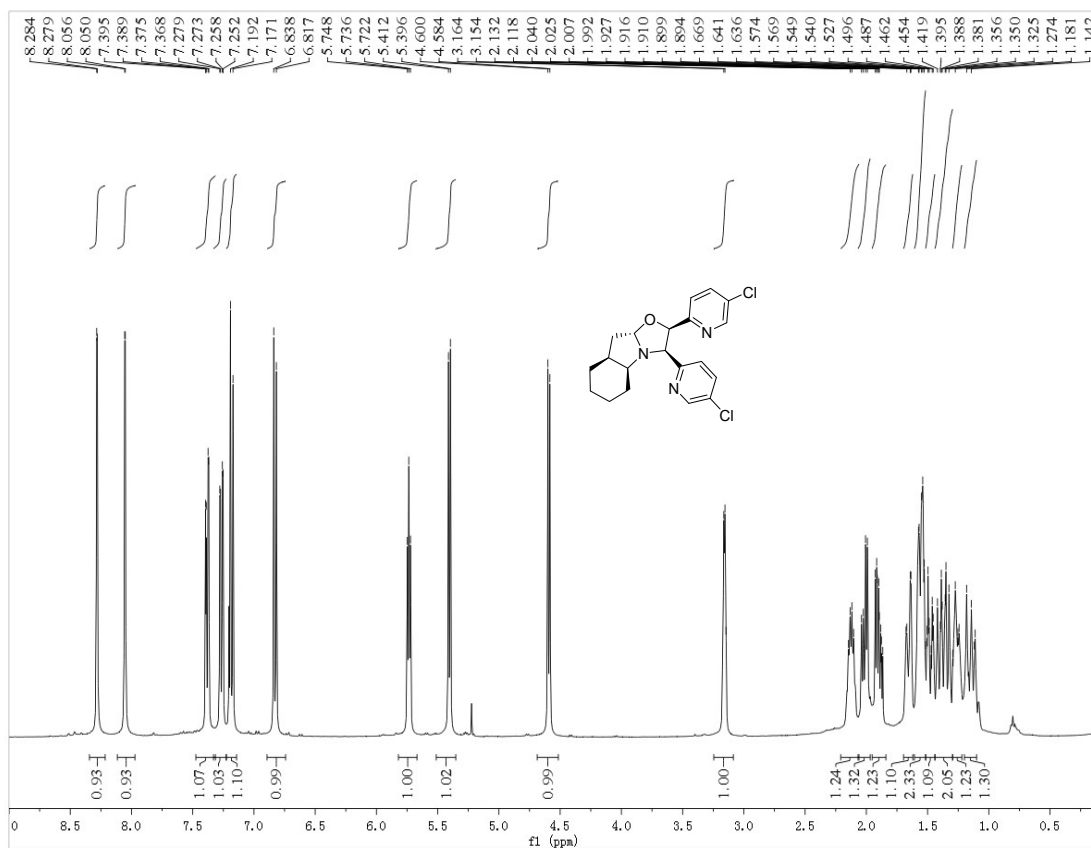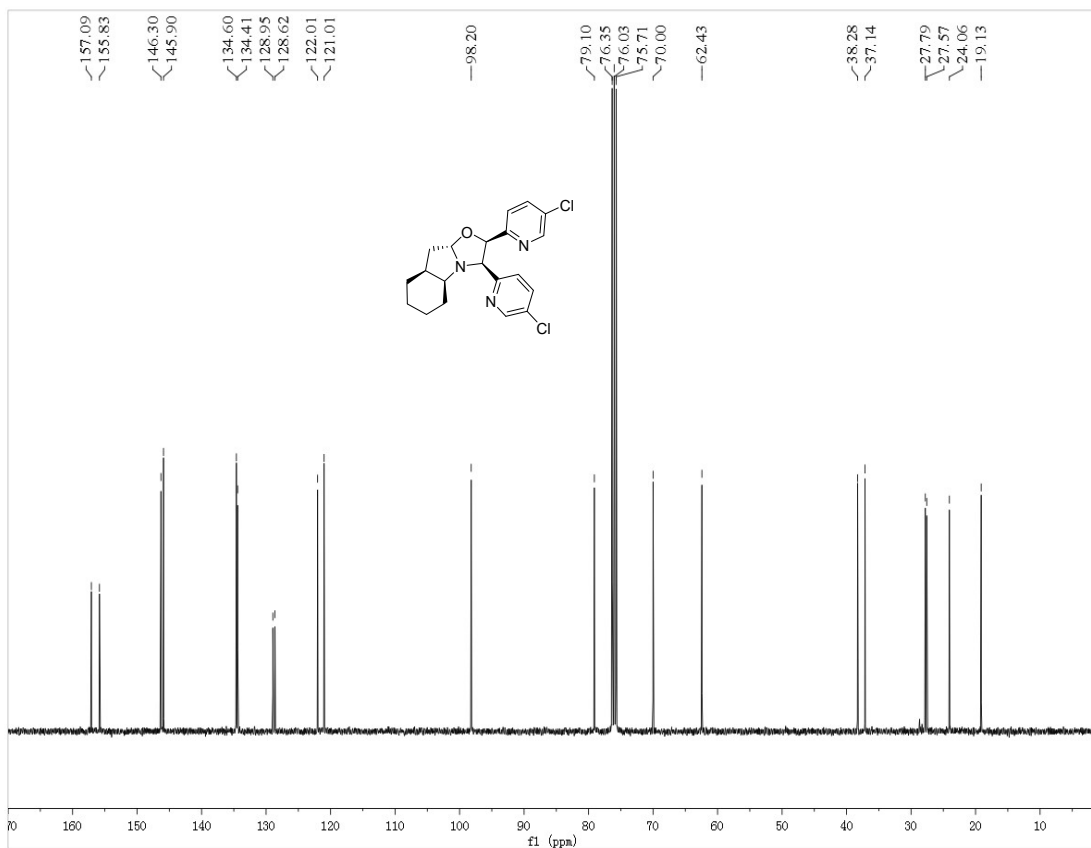

# <sup>1</sup>H and <sup>13</sup>C NMR of 3f

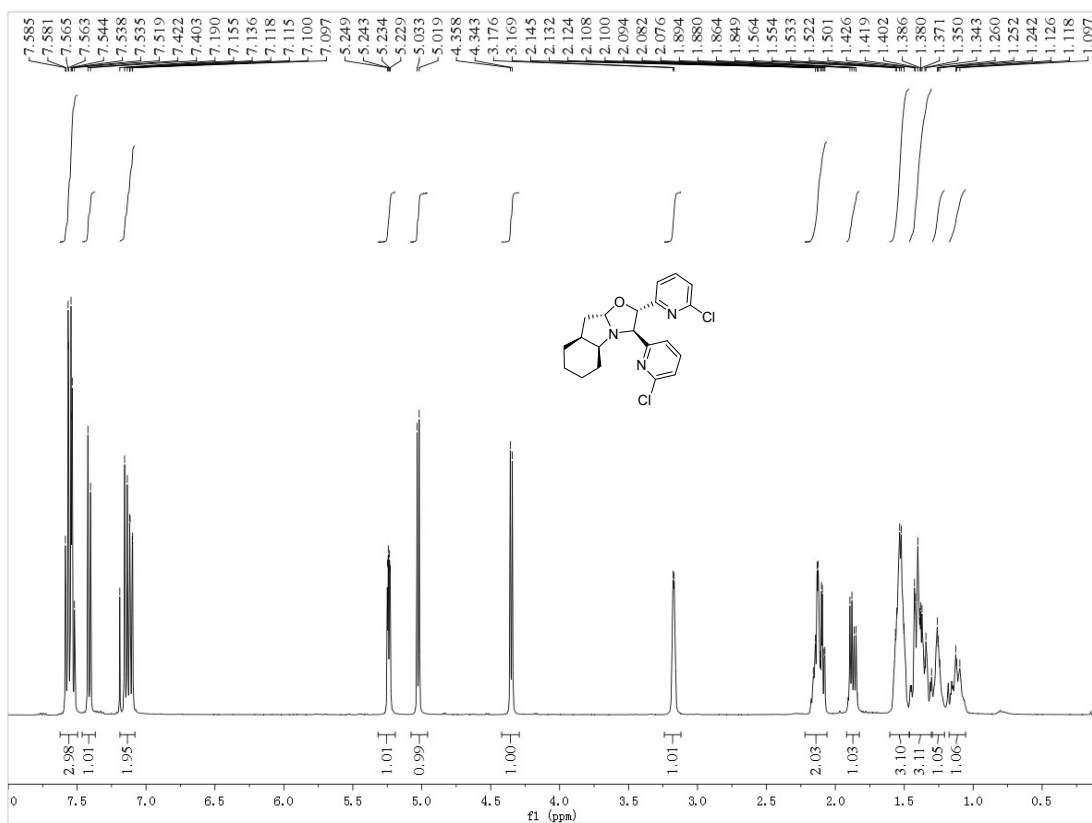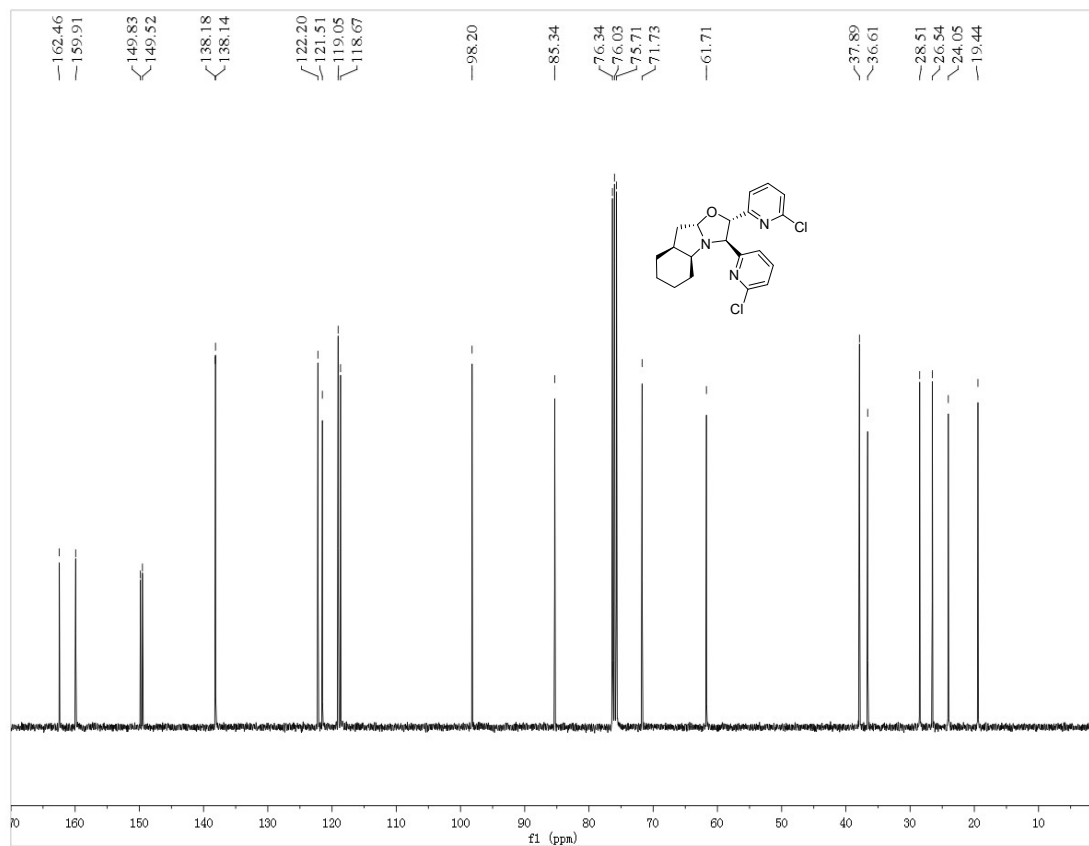

# <sup>1</sup>H and <sup>13</sup>C NMR of 3g-1

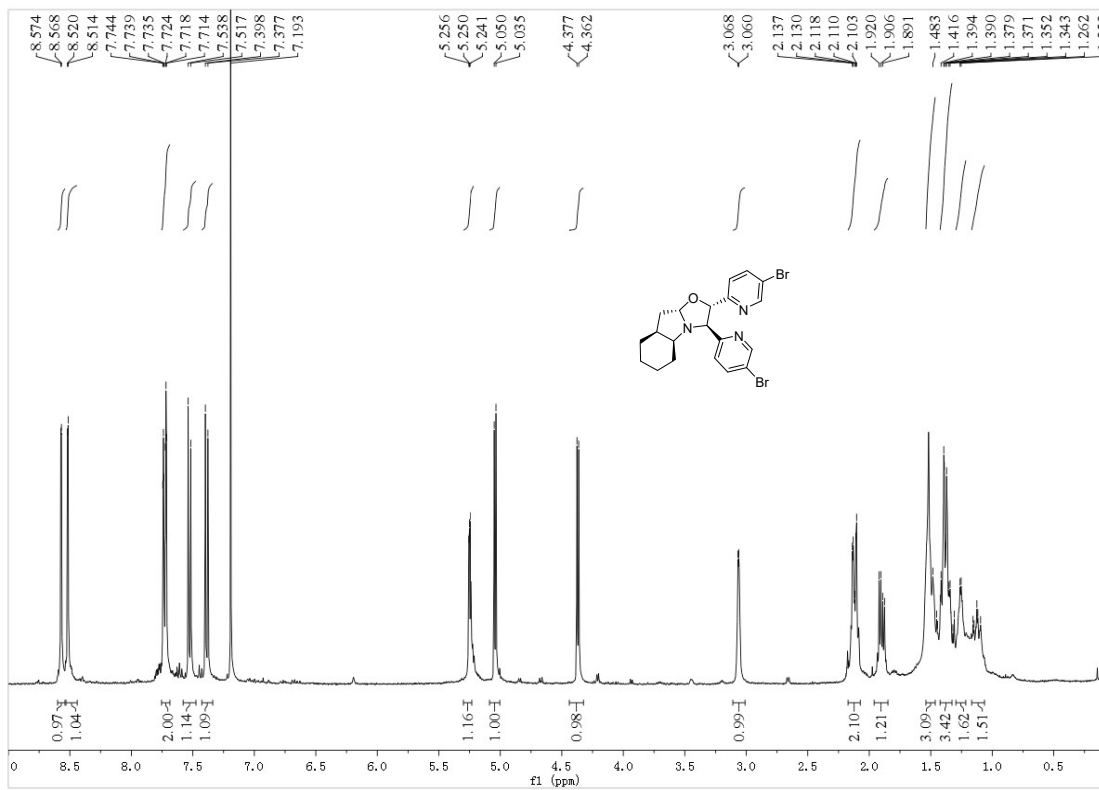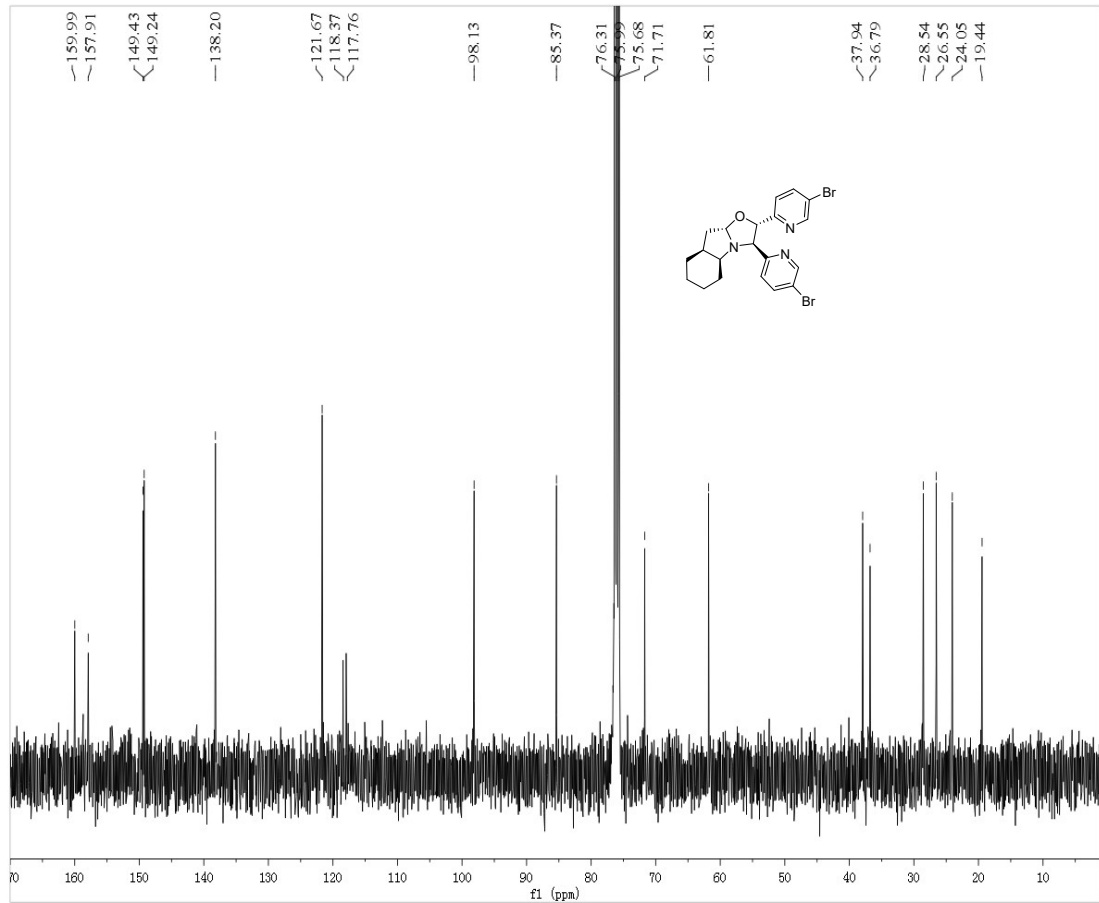

# <sup>1</sup>H and <sup>13</sup>C NMR of 3g-2

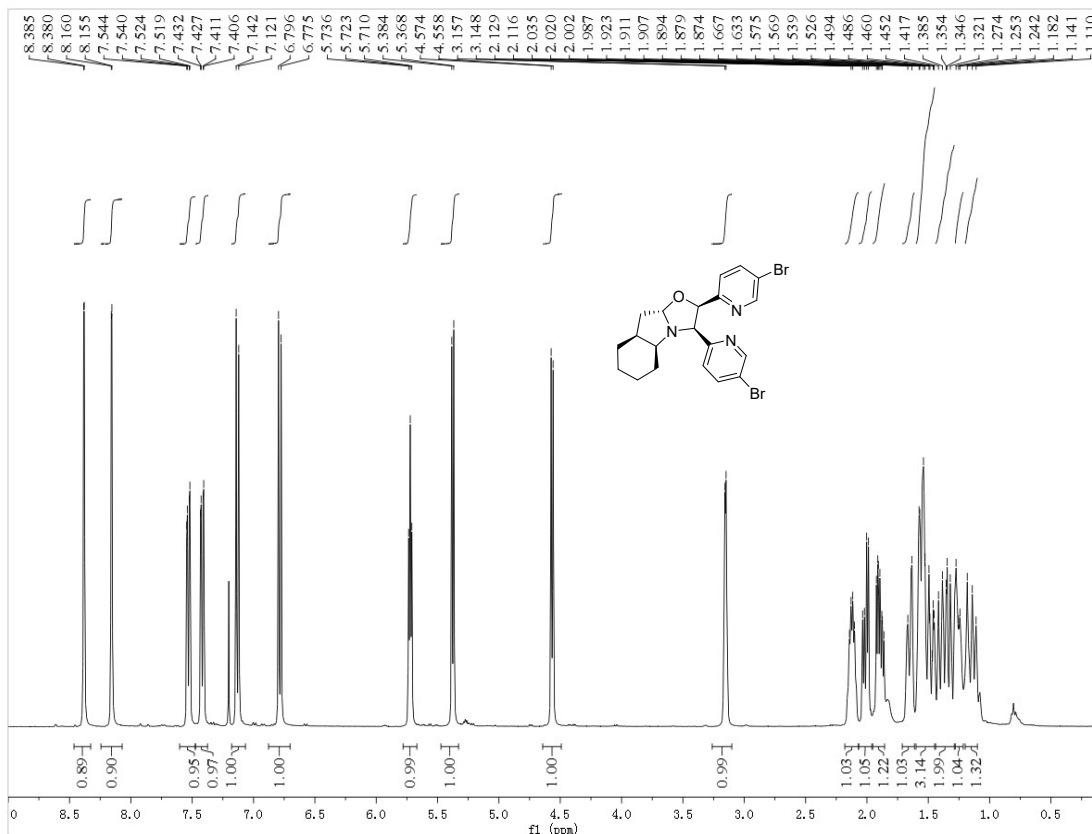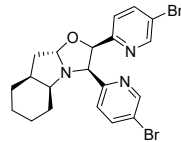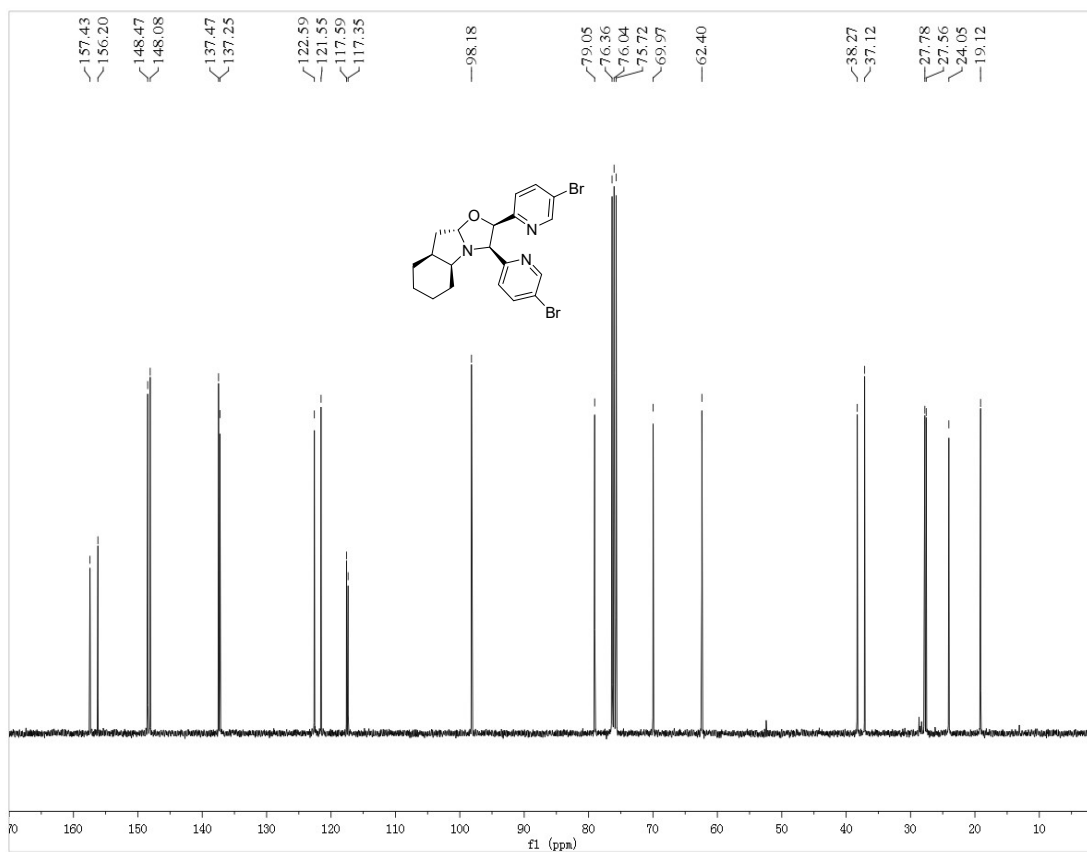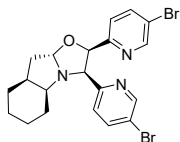

# <sup>1</sup>H and <sup>13</sup>C NMR of 3h-1

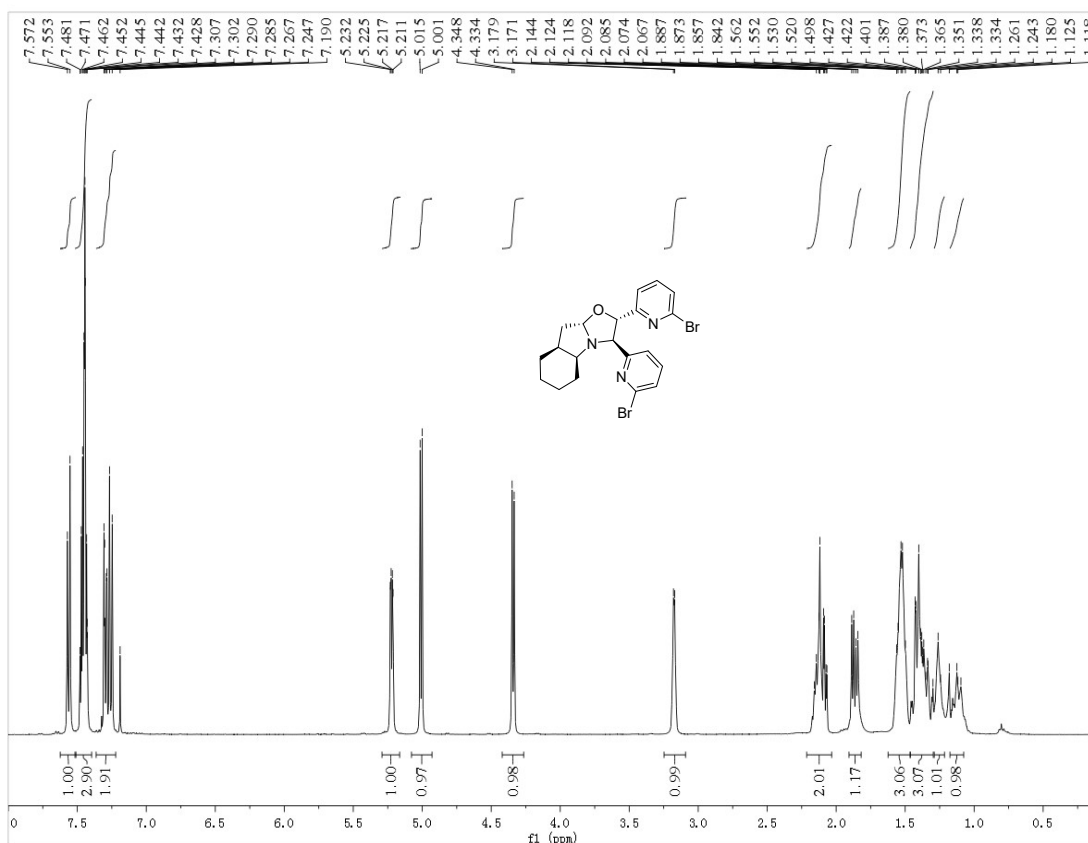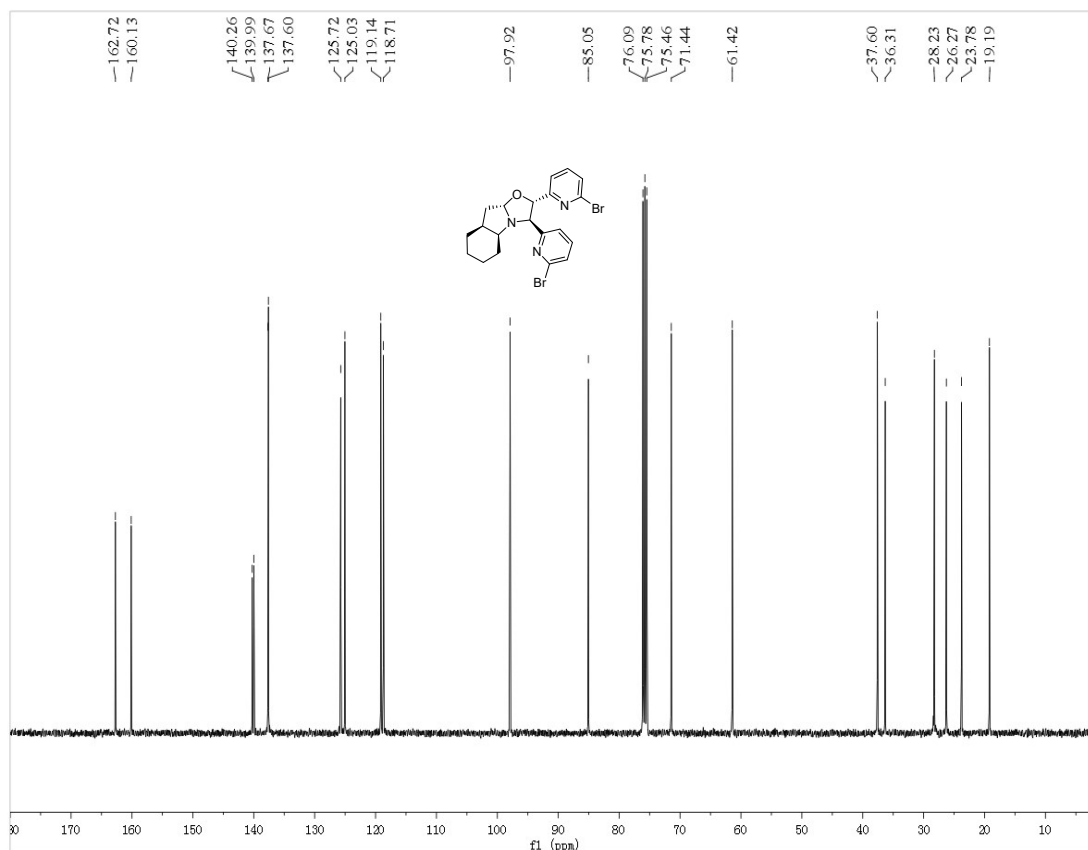



# <sup>1</sup>H and <sup>13</sup>C NMR of 3h-2

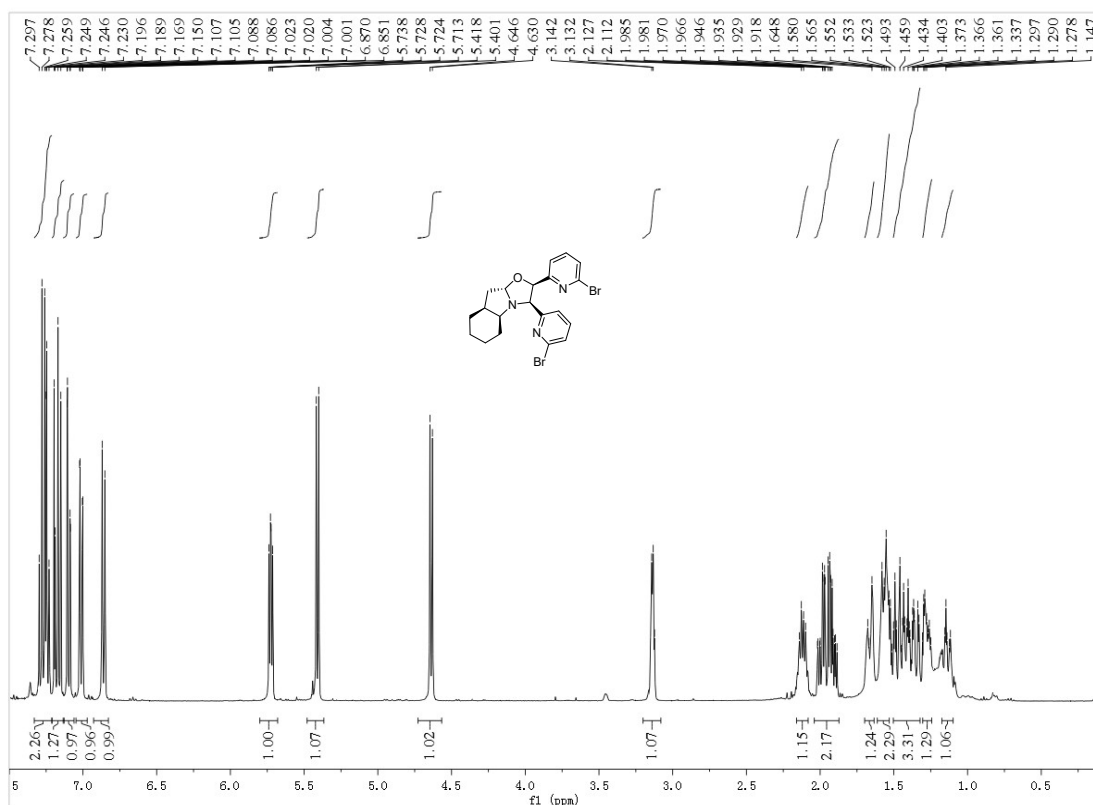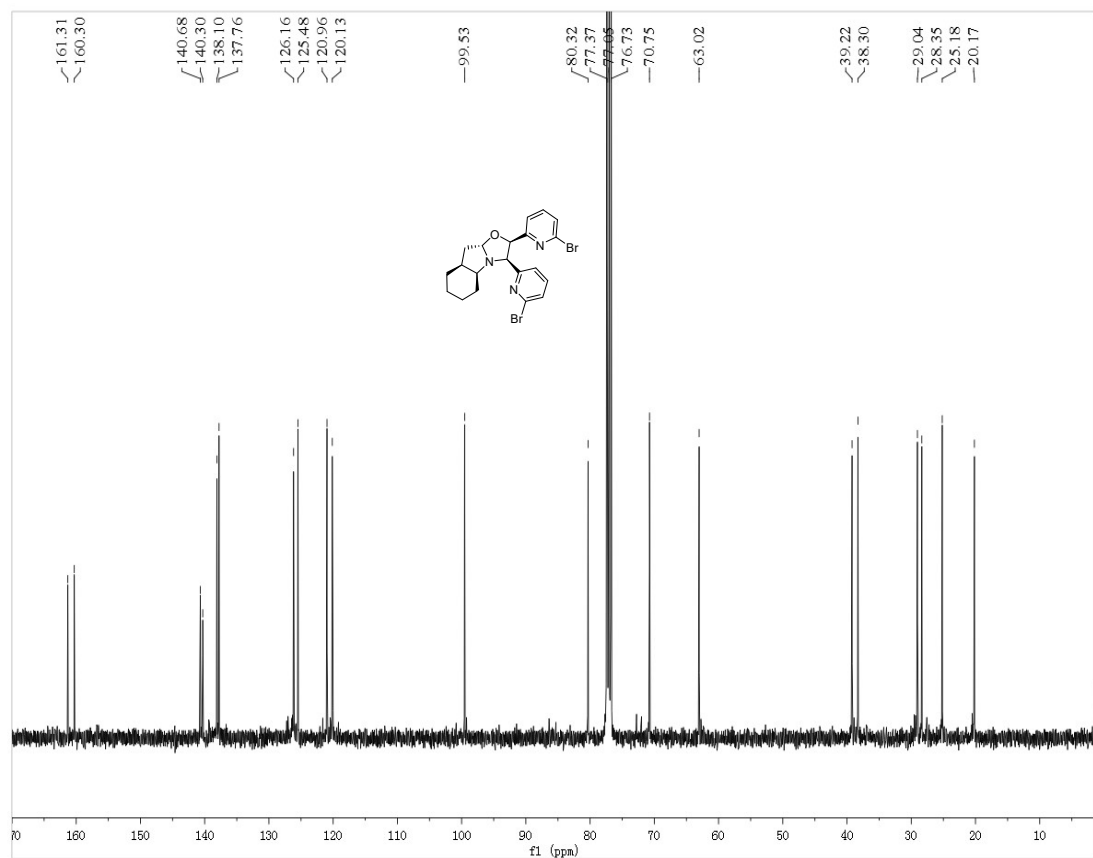

# <sup>1</sup>H and <sup>13</sup>C NMR of 3i-1

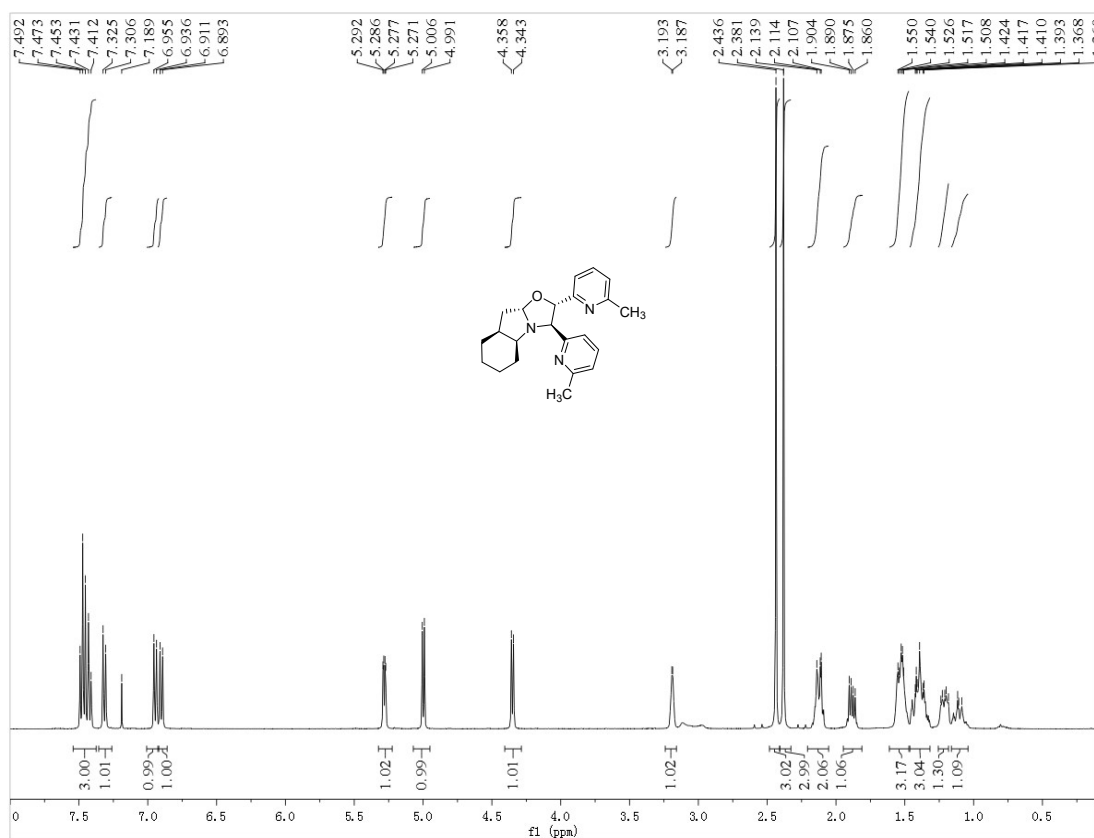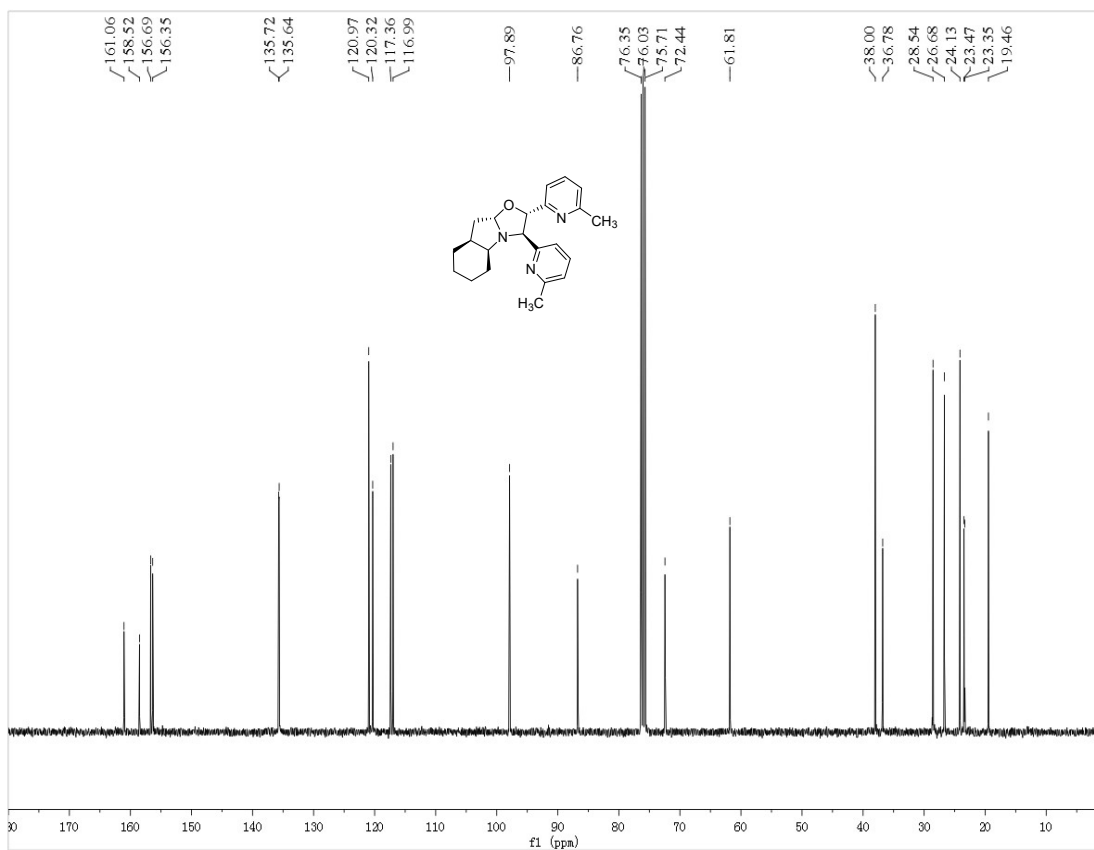

# <sup>1</sup>H and <sup>13</sup>C NMR of 3i-2

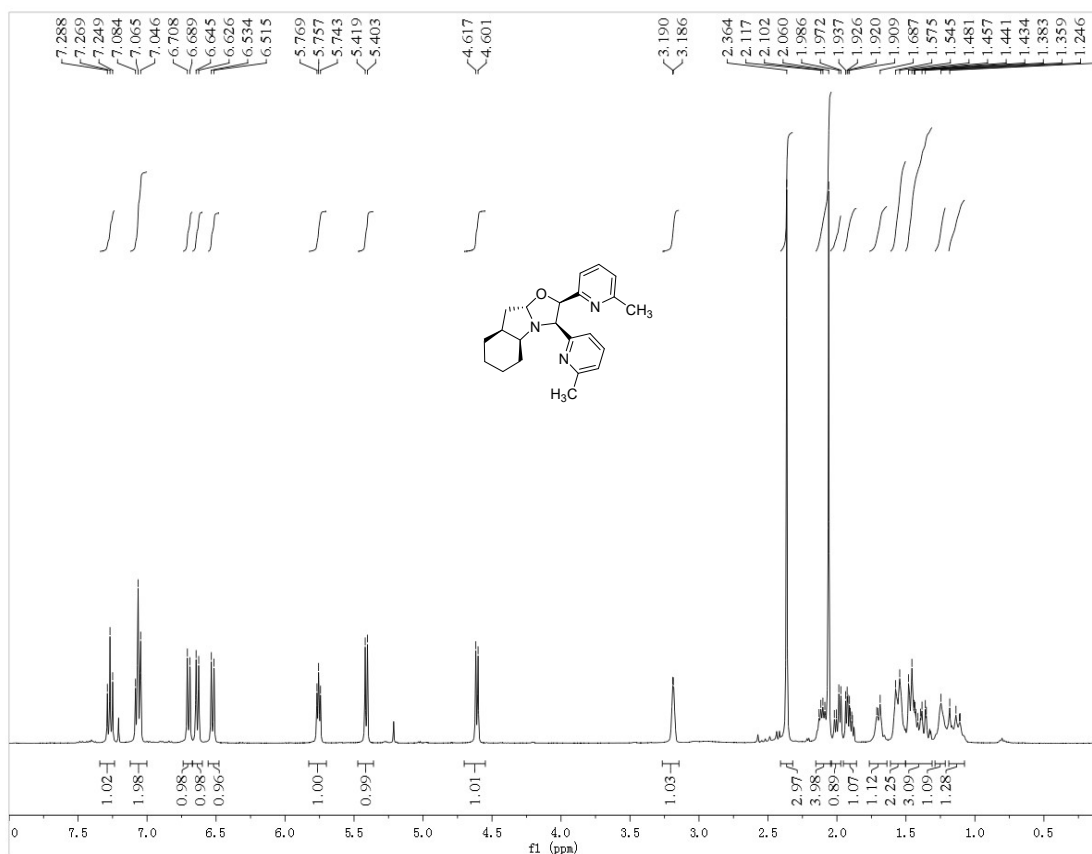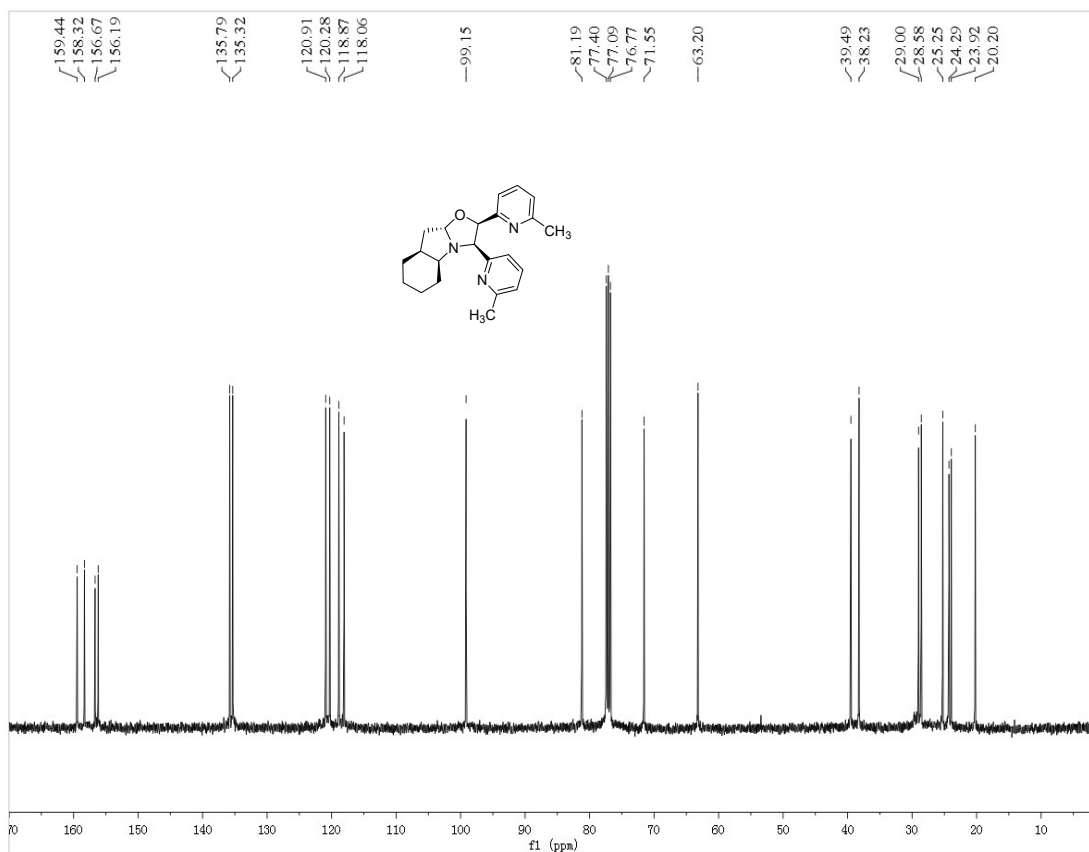

# $^1\text{H}$ and $^{13}\text{C}$ NMR of 3j

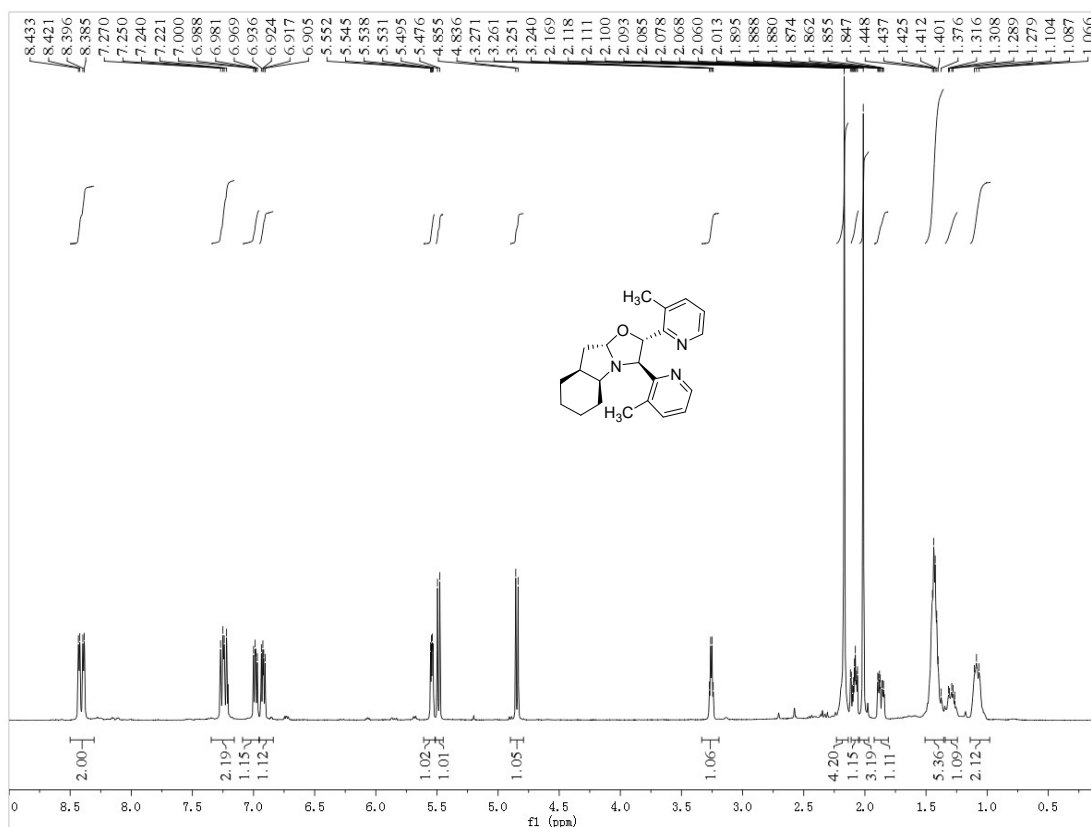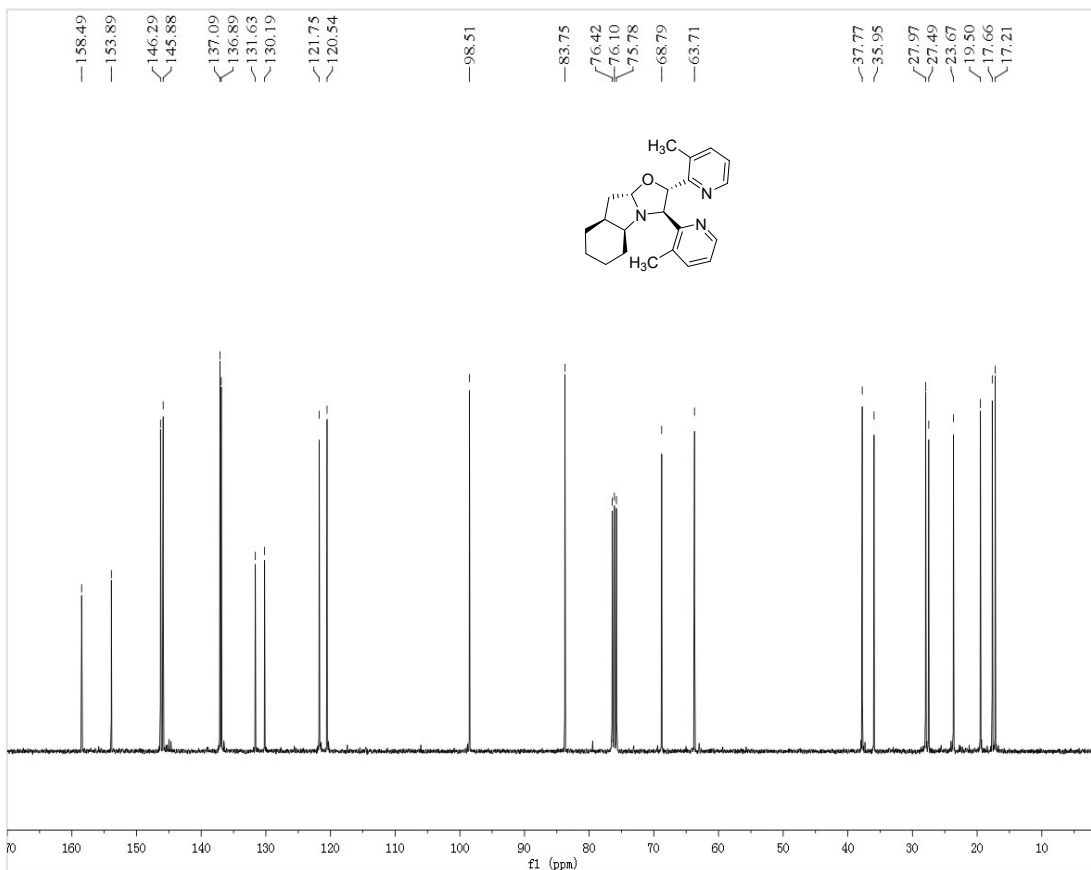

# <sup>1</sup>H and <sup>13</sup>C NMR of 3k-1

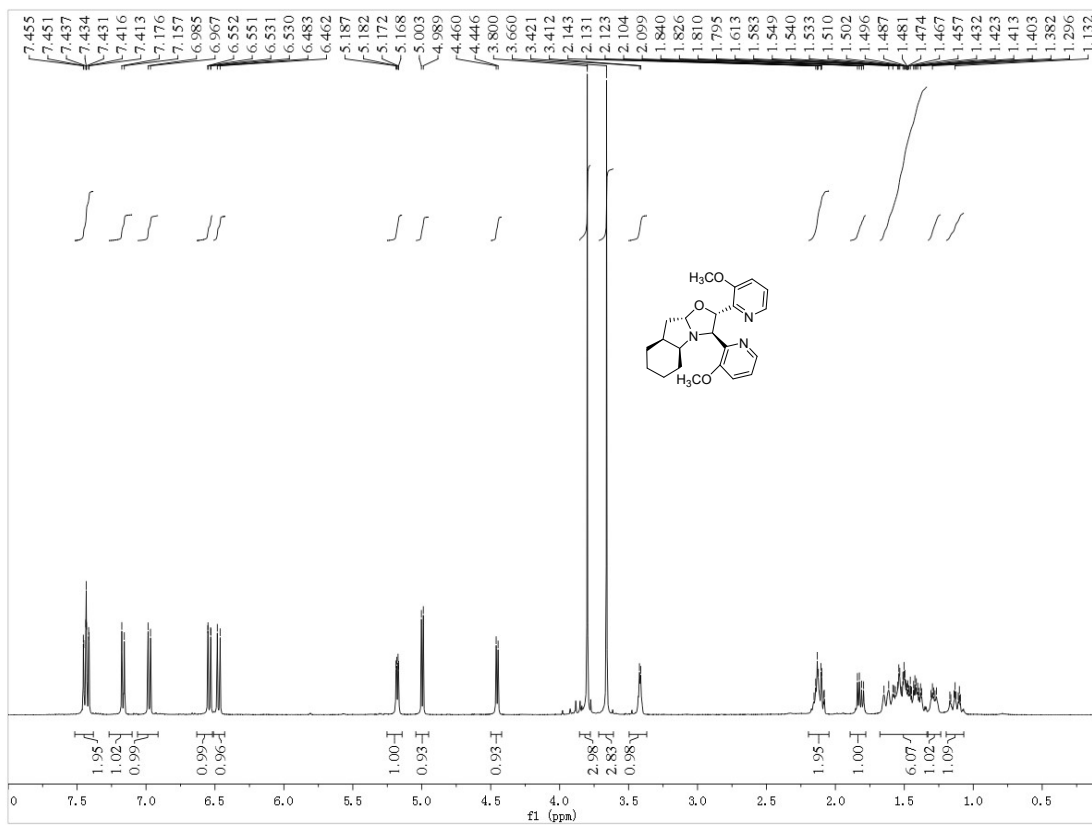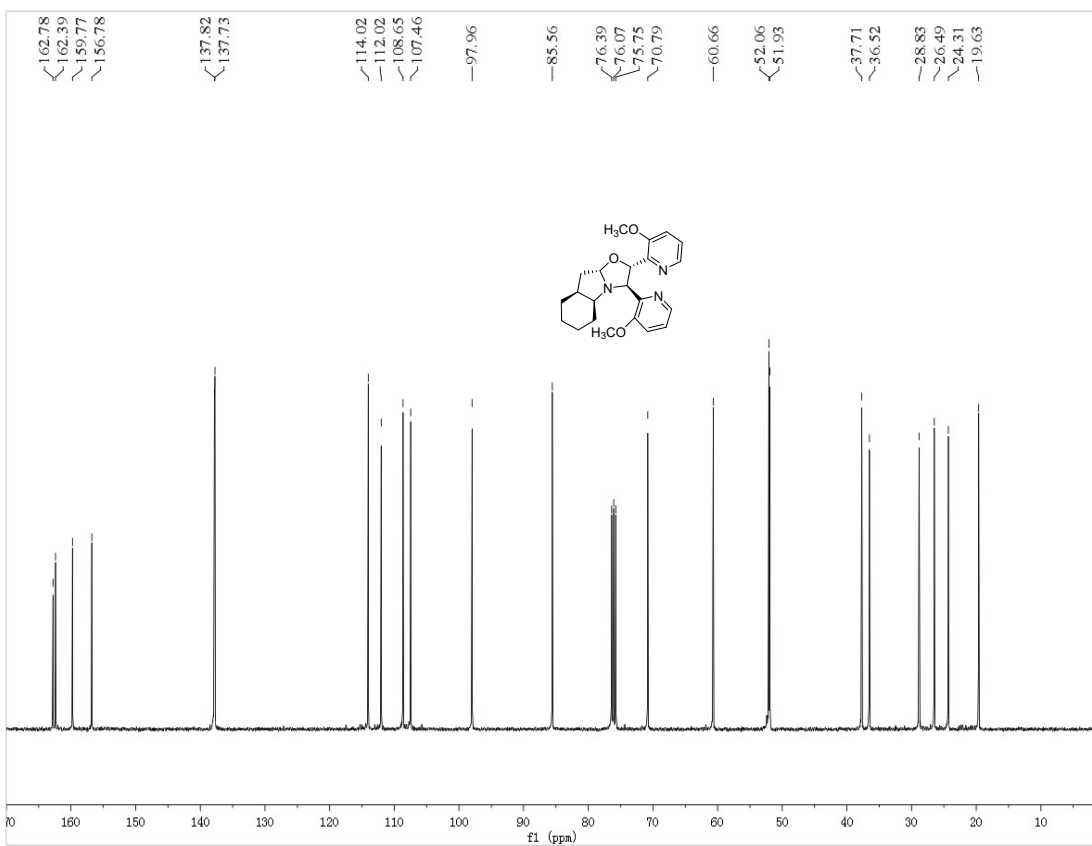

# <sup>1</sup>H and <sup>13</sup>C NMR of 3k-2

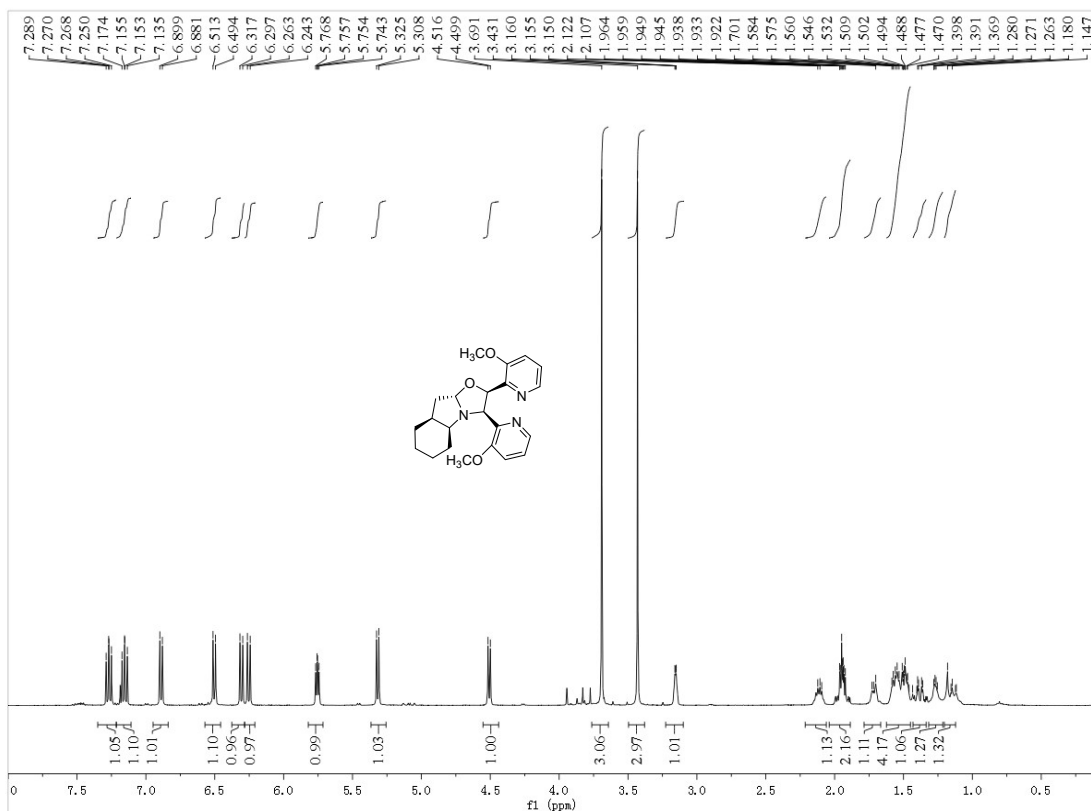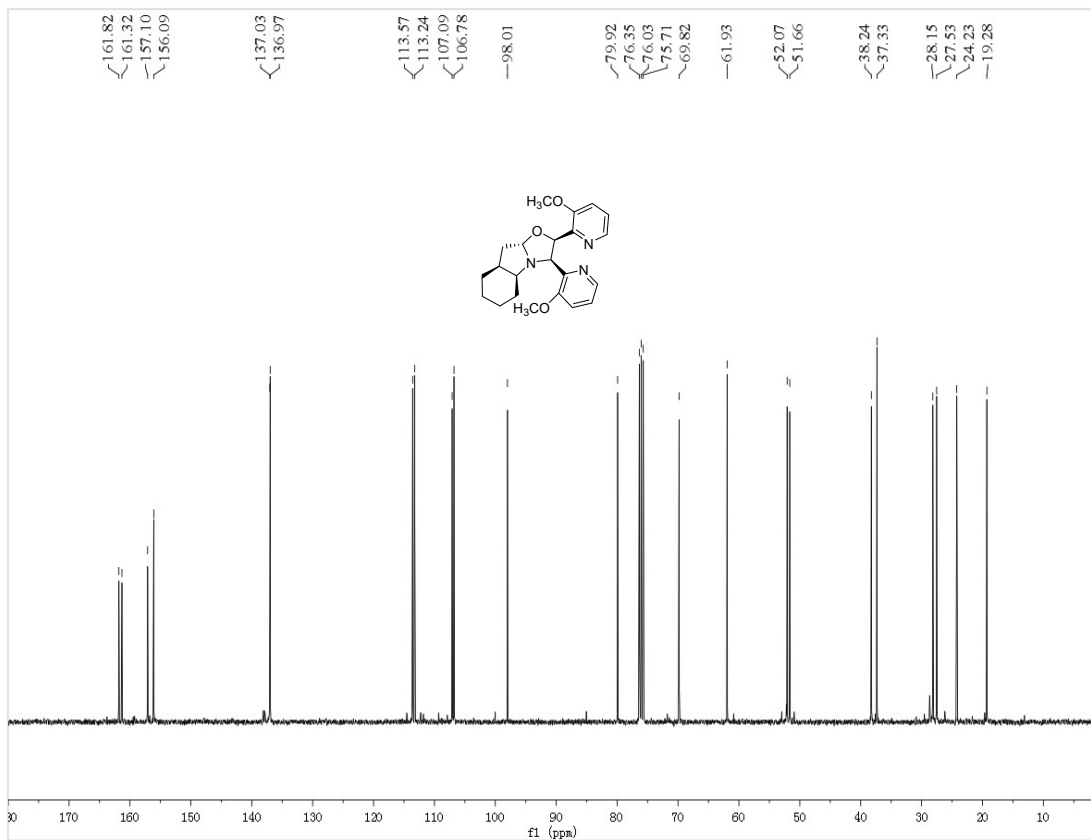

# <sup>1</sup>H and <sup>13</sup>C NMR of 3l

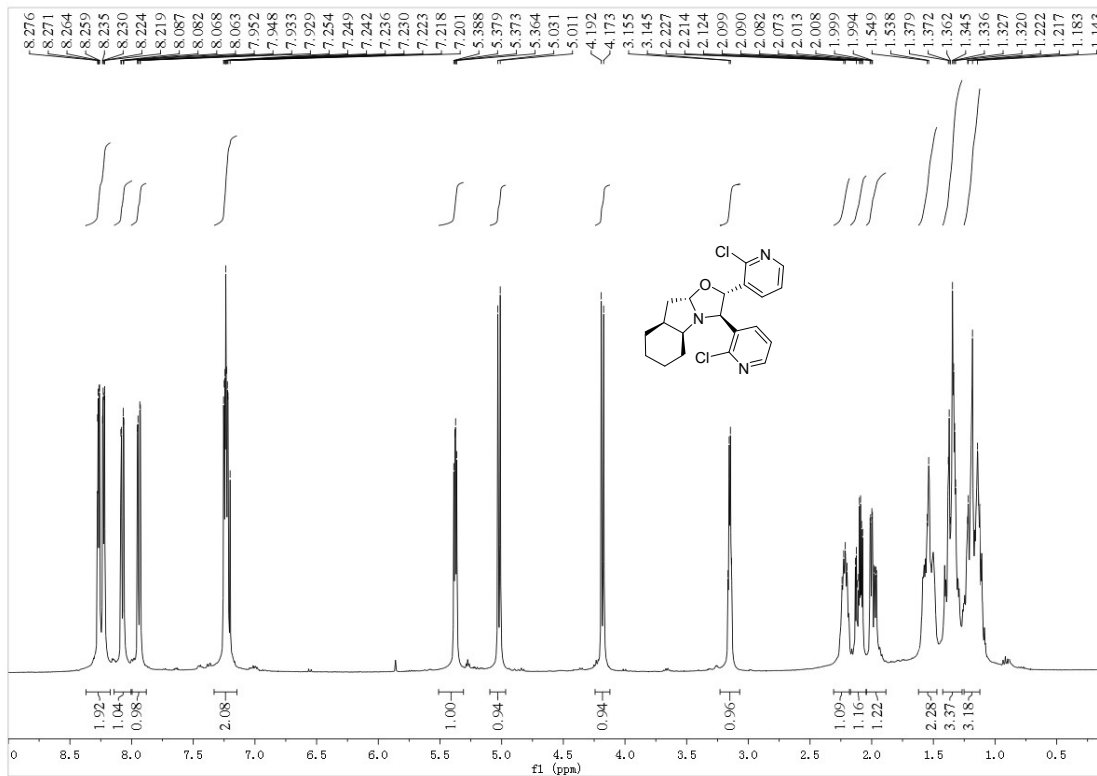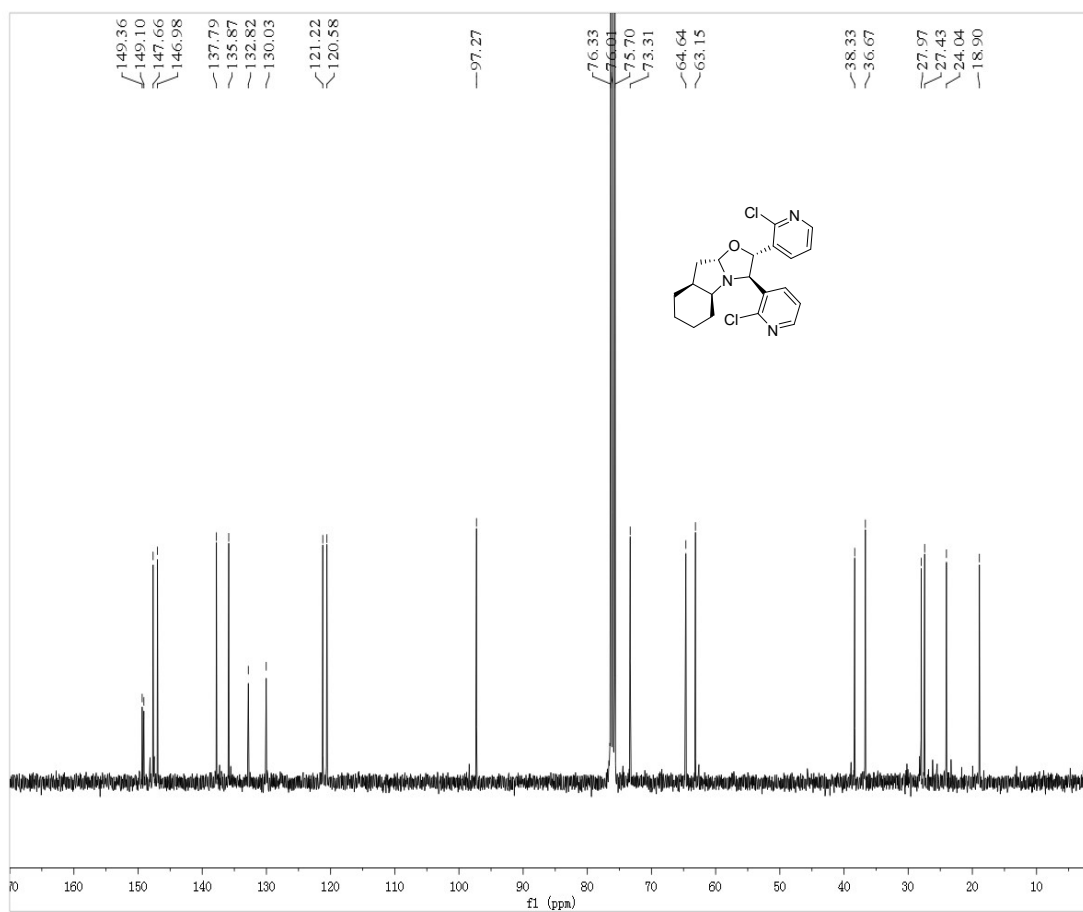

# <sup>1</sup>H and <sup>13</sup>C NMR of 3m

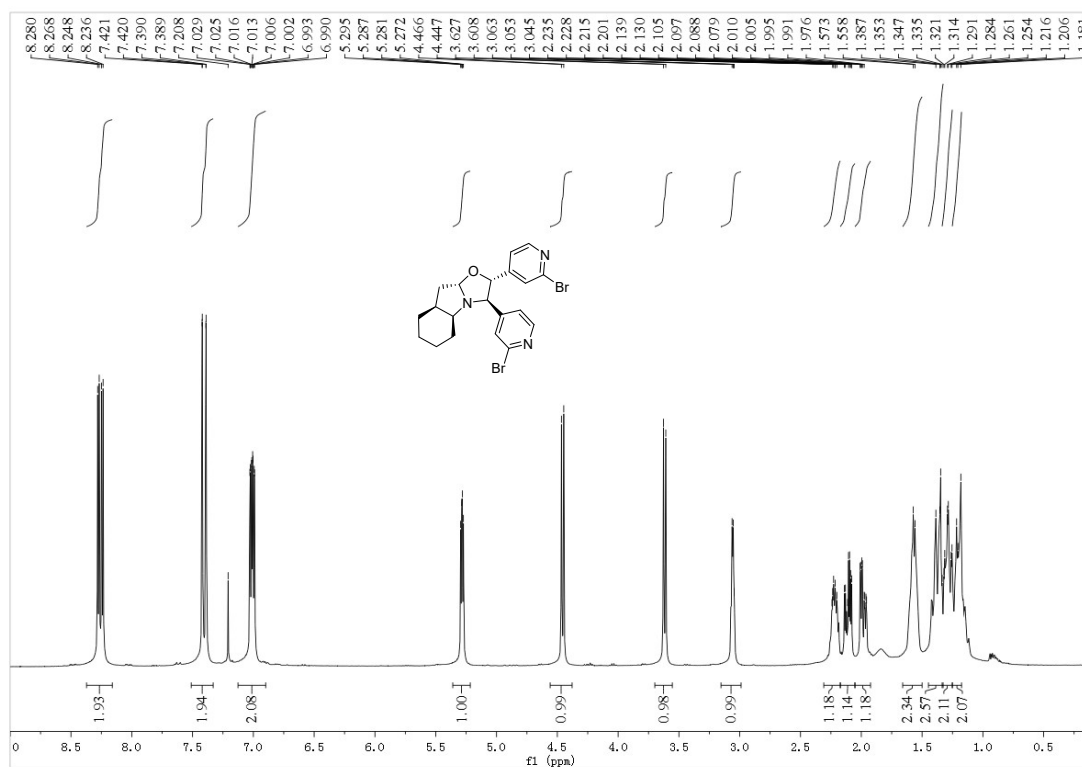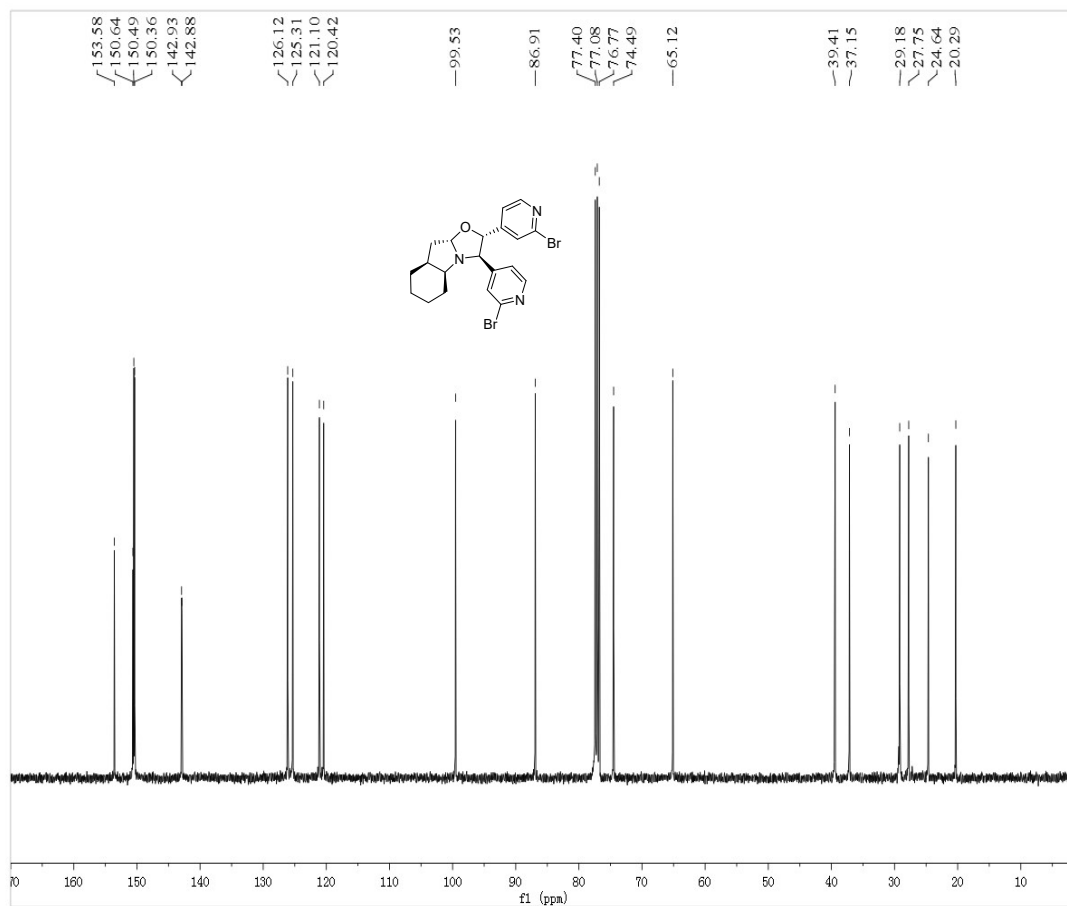



# <sup>1</sup>H and <sup>13</sup>C NMR of 4a

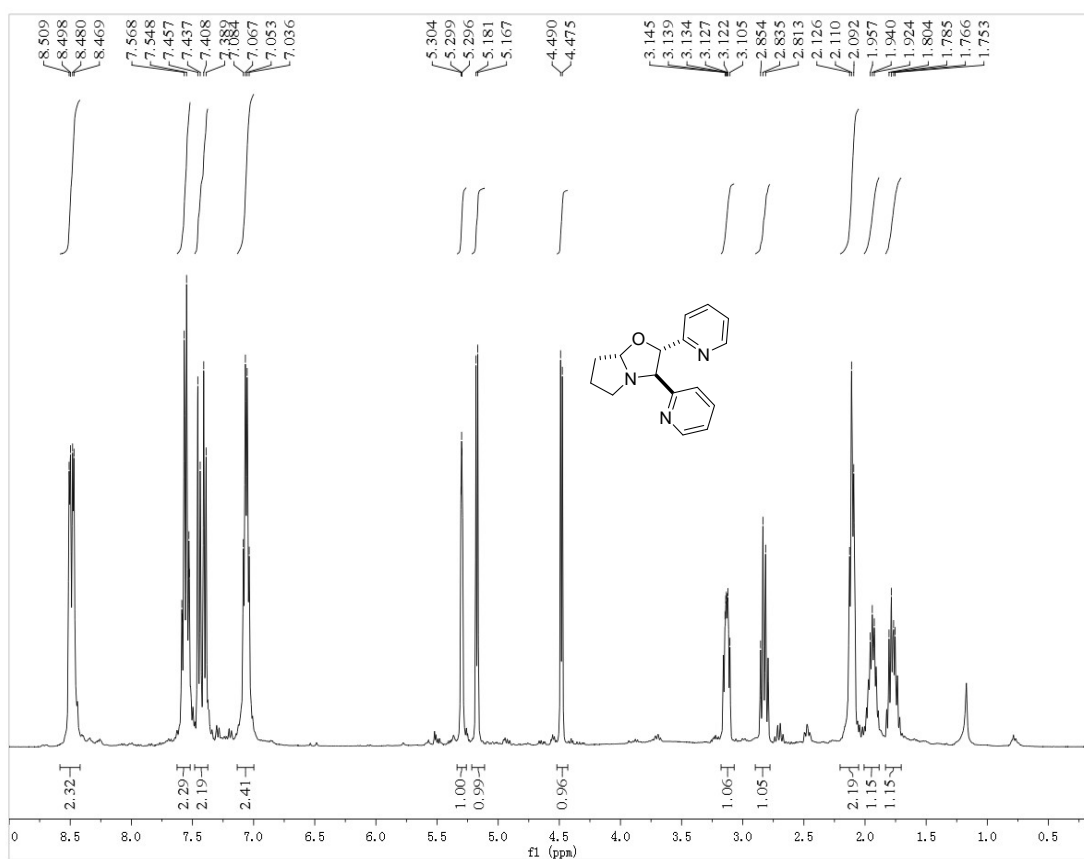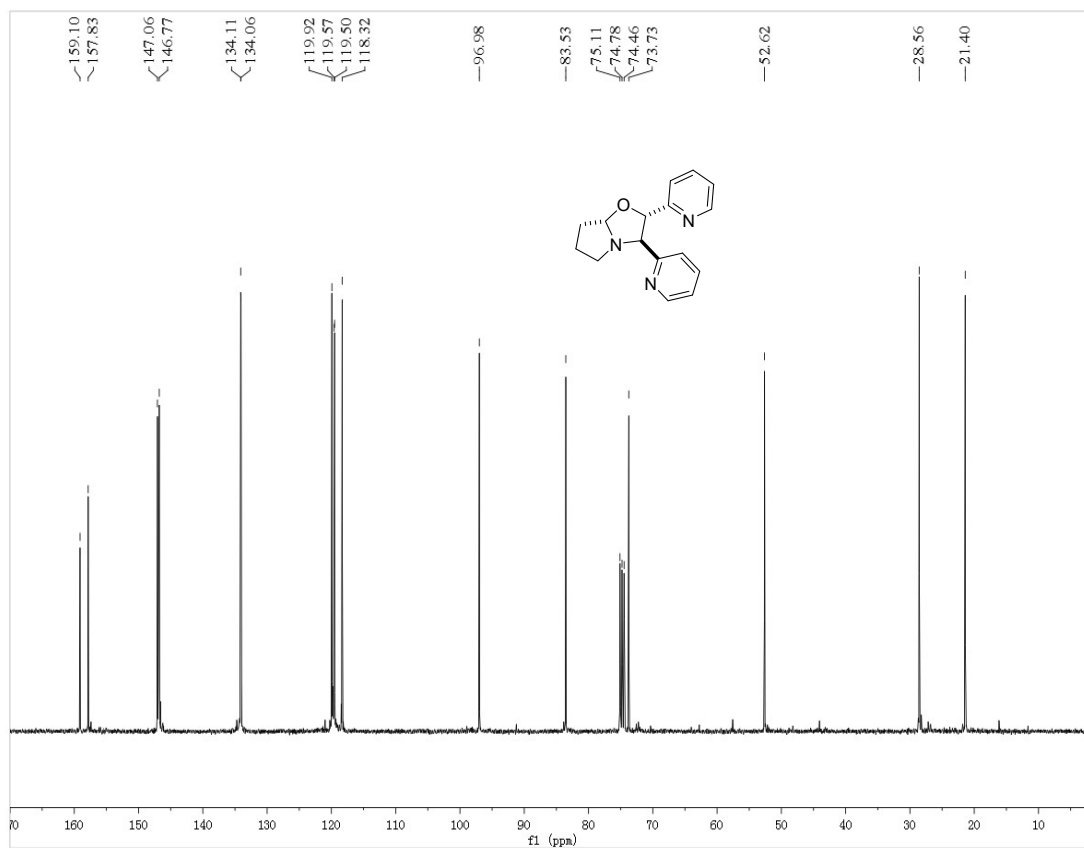

# <sup>1</sup>H and <sup>13</sup>C NMR of 4b

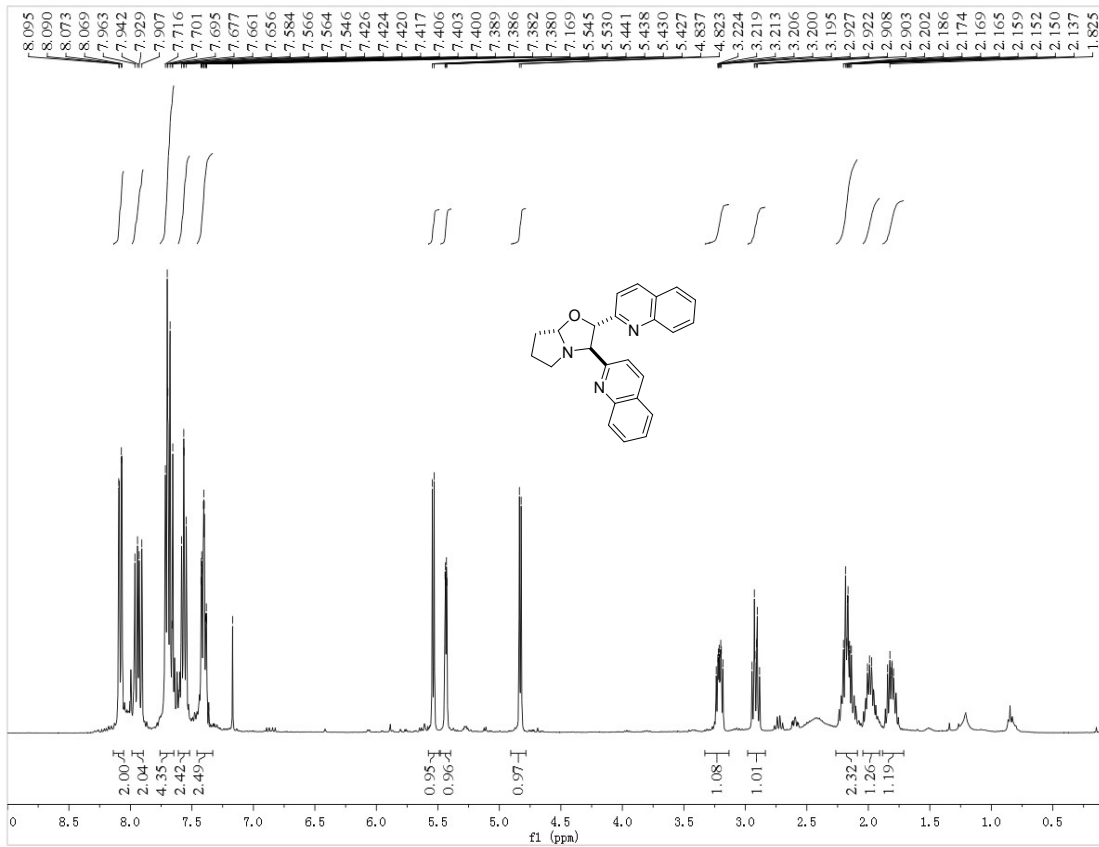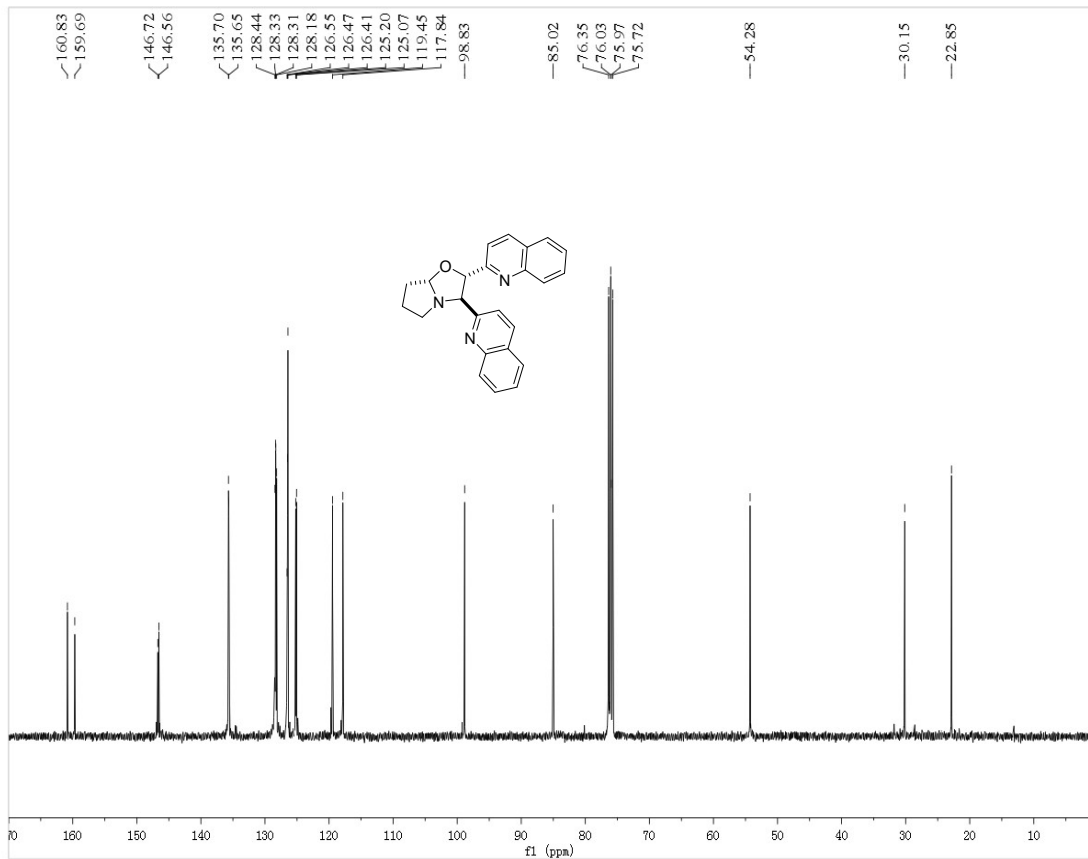

# <sup>1</sup>H and <sup>13</sup>C NMR of 4c

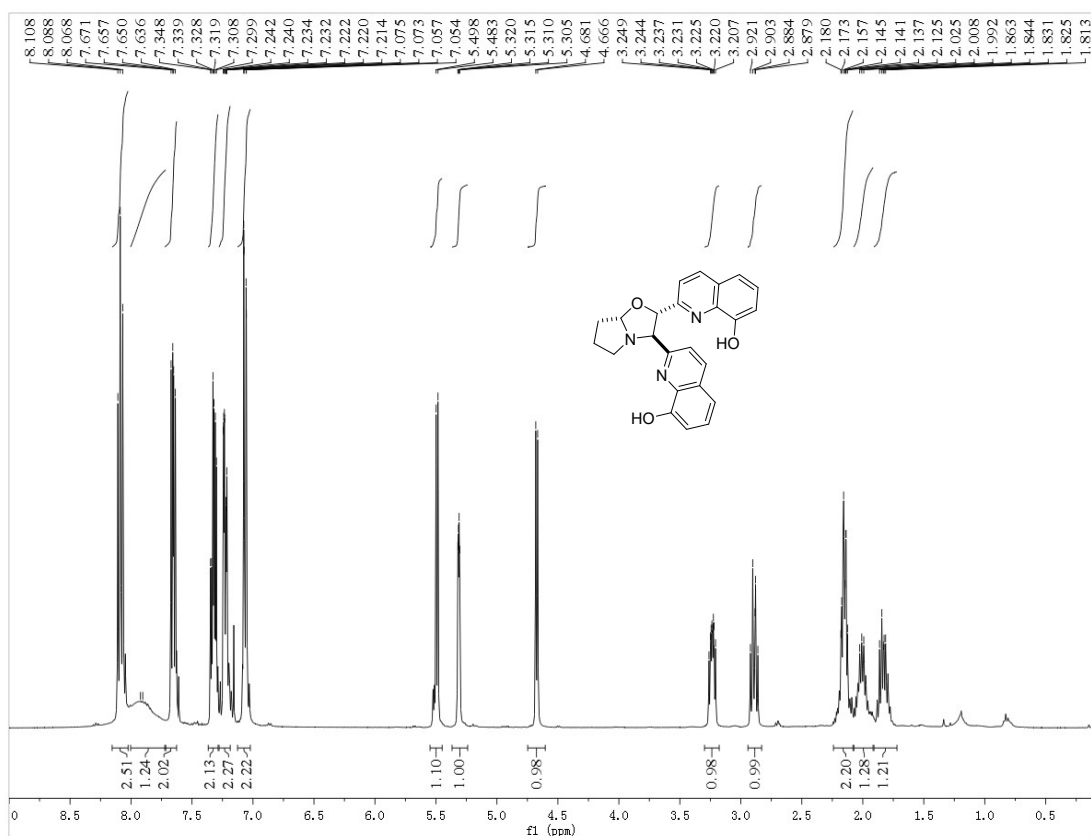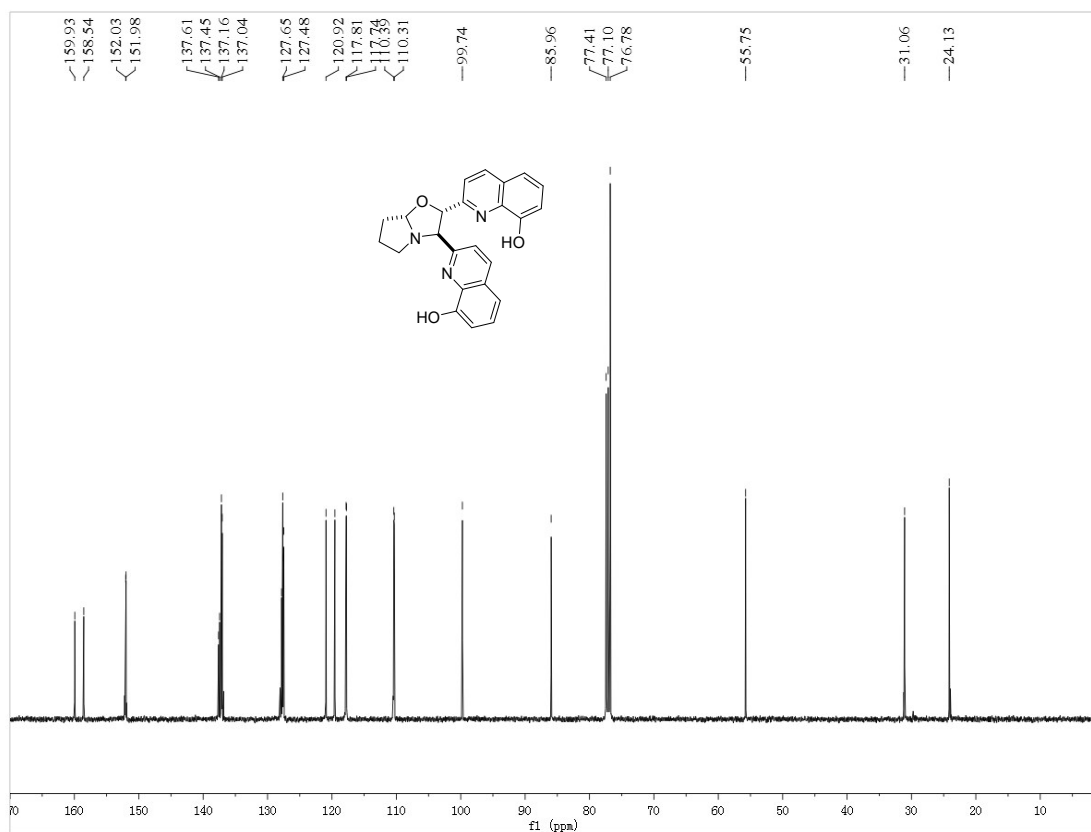

# <sup>1</sup>H and <sup>13</sup>C NMR of 4d-1

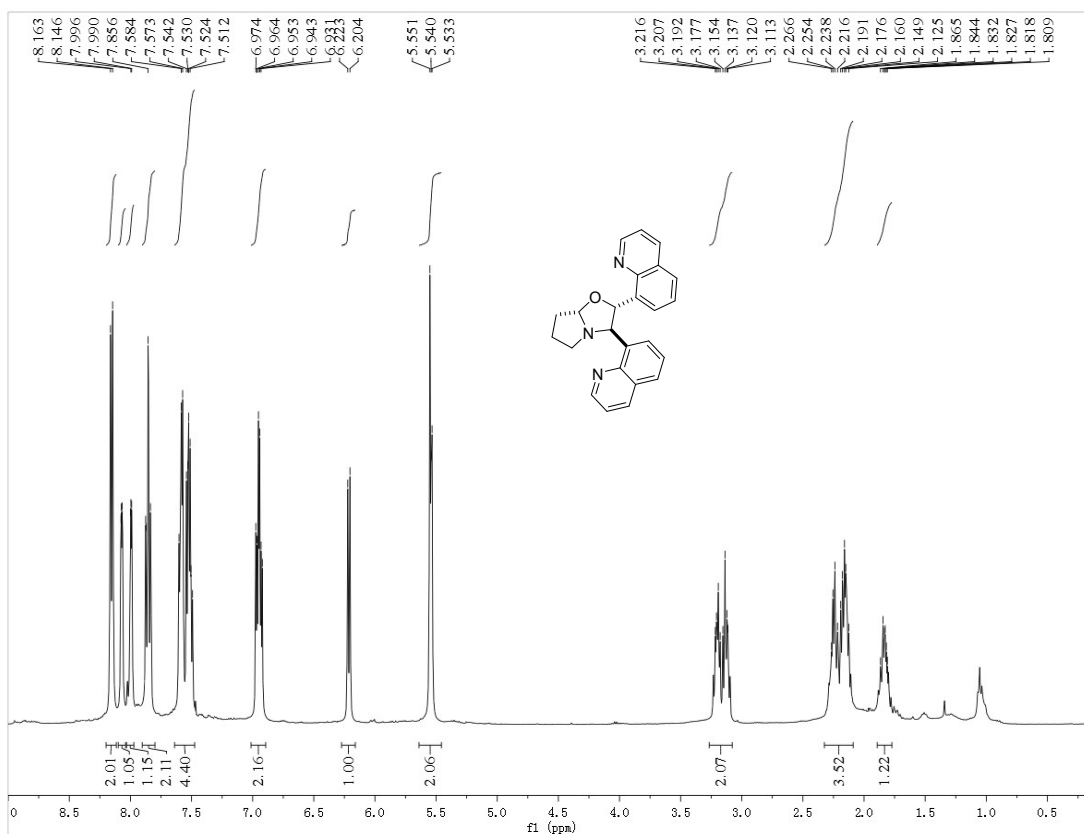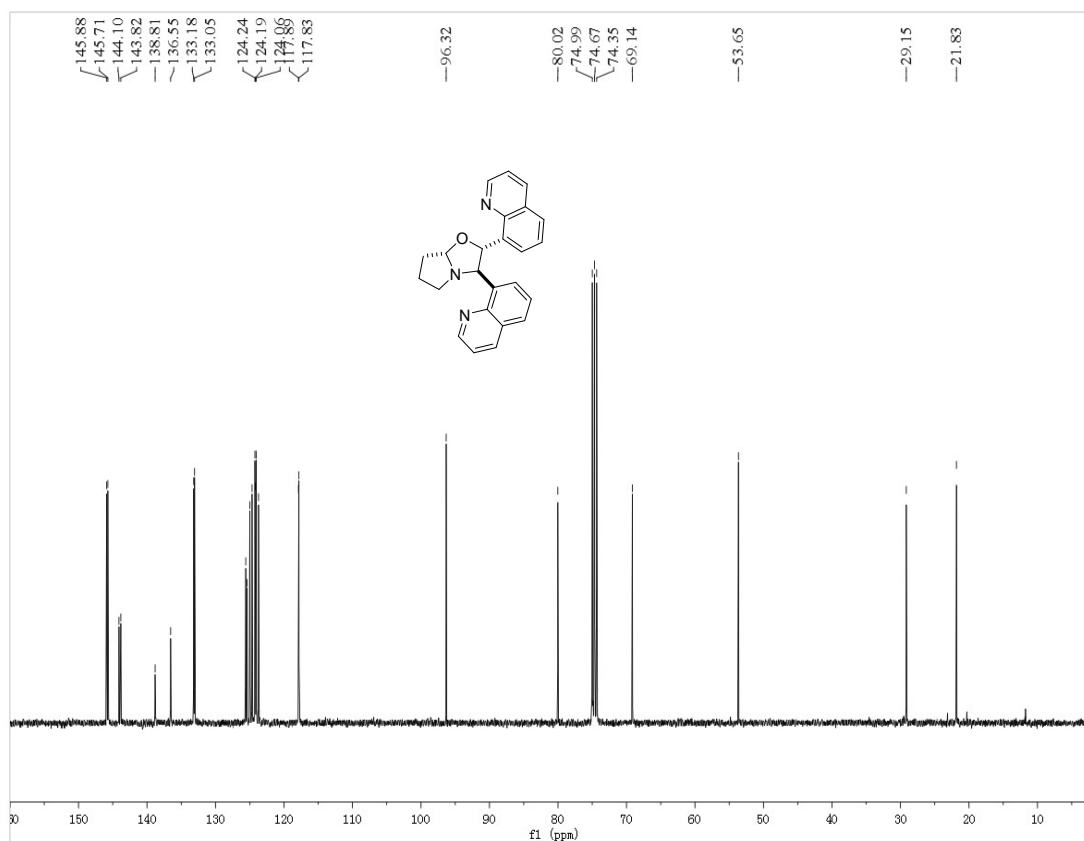

# <sup>1</sup>H and <sup>13</sup>C NMR of 4d-2

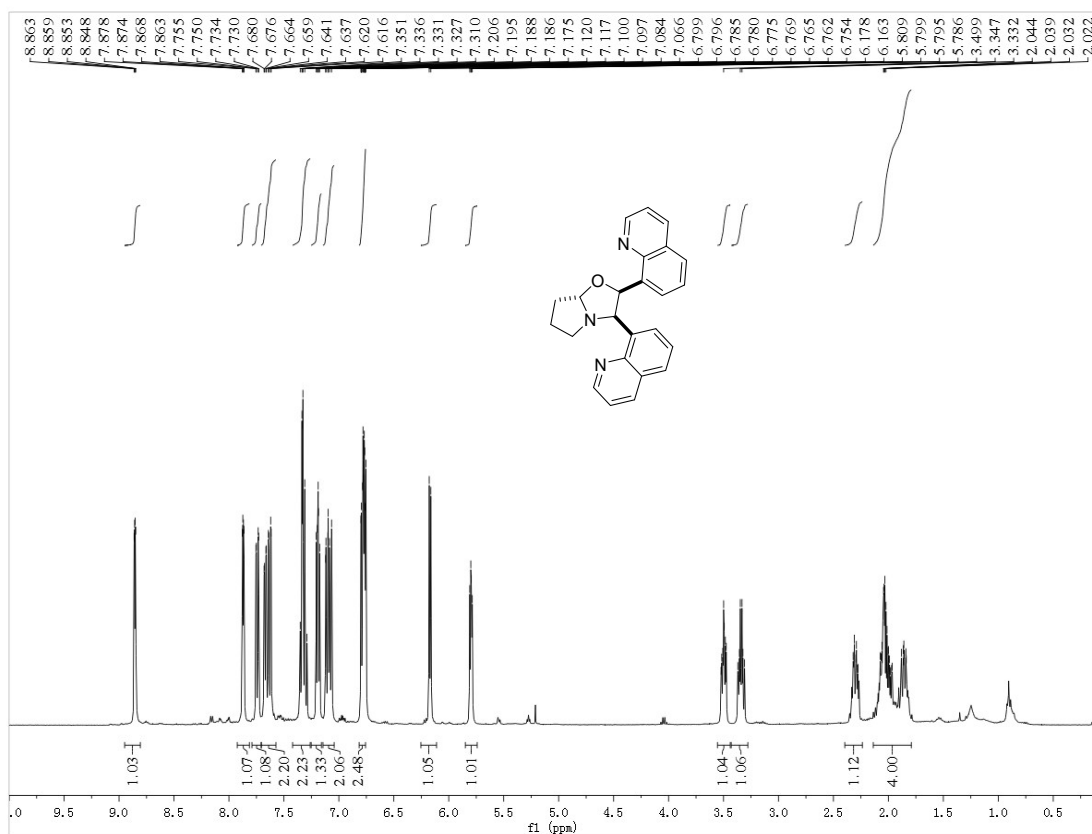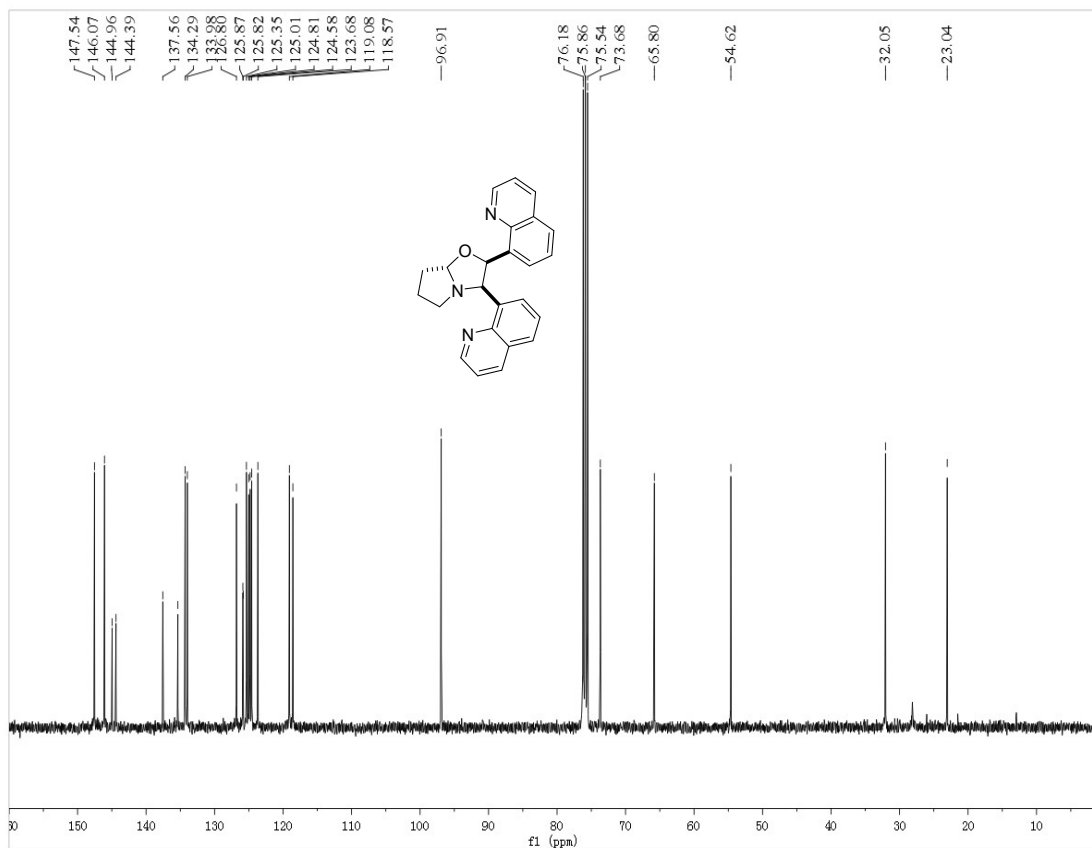

# <sup>1</sup>H and <sup>13</sup>C NMR of 6a-1

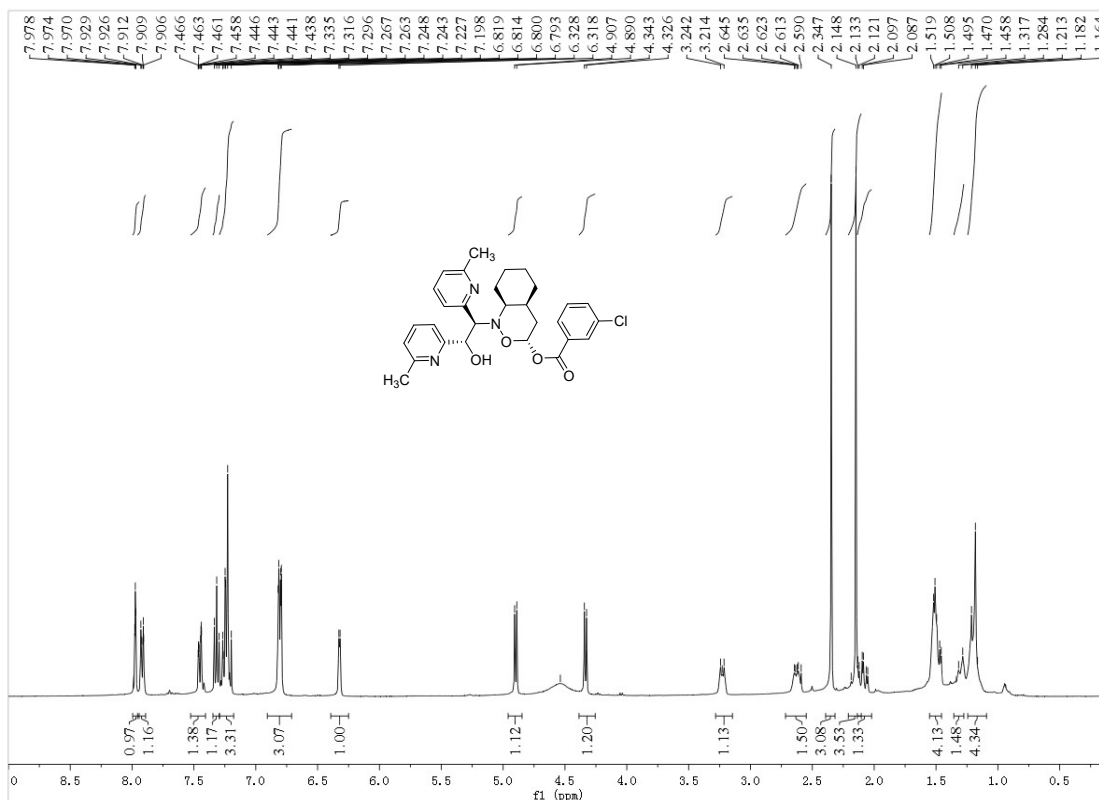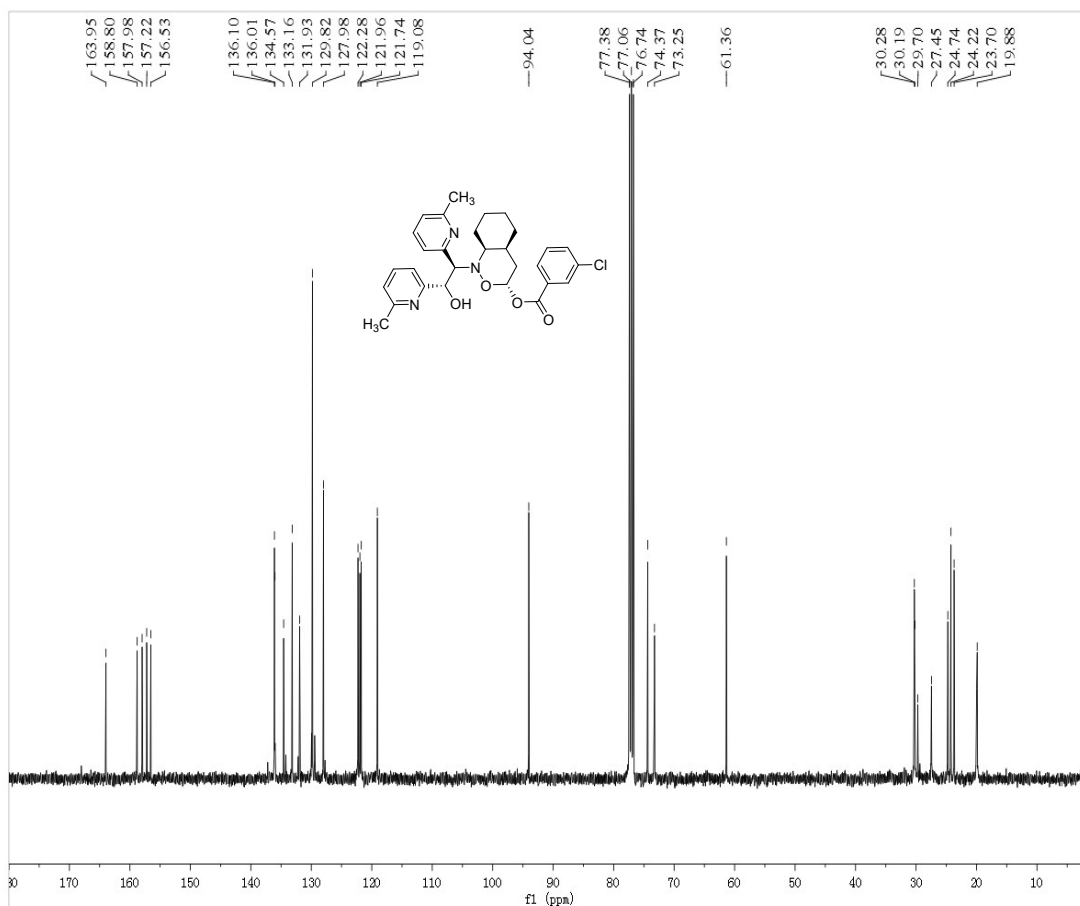

# <sup>1</sup>H and <sup>13</sup>C NMR of 6b-1

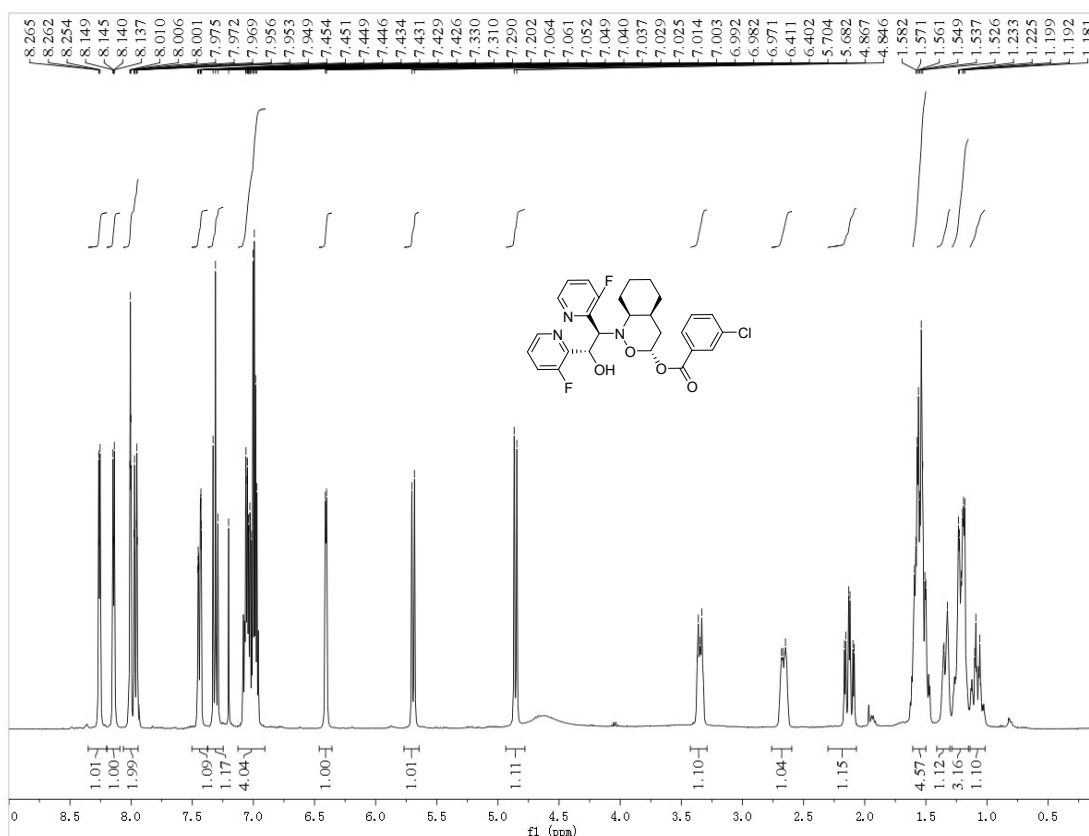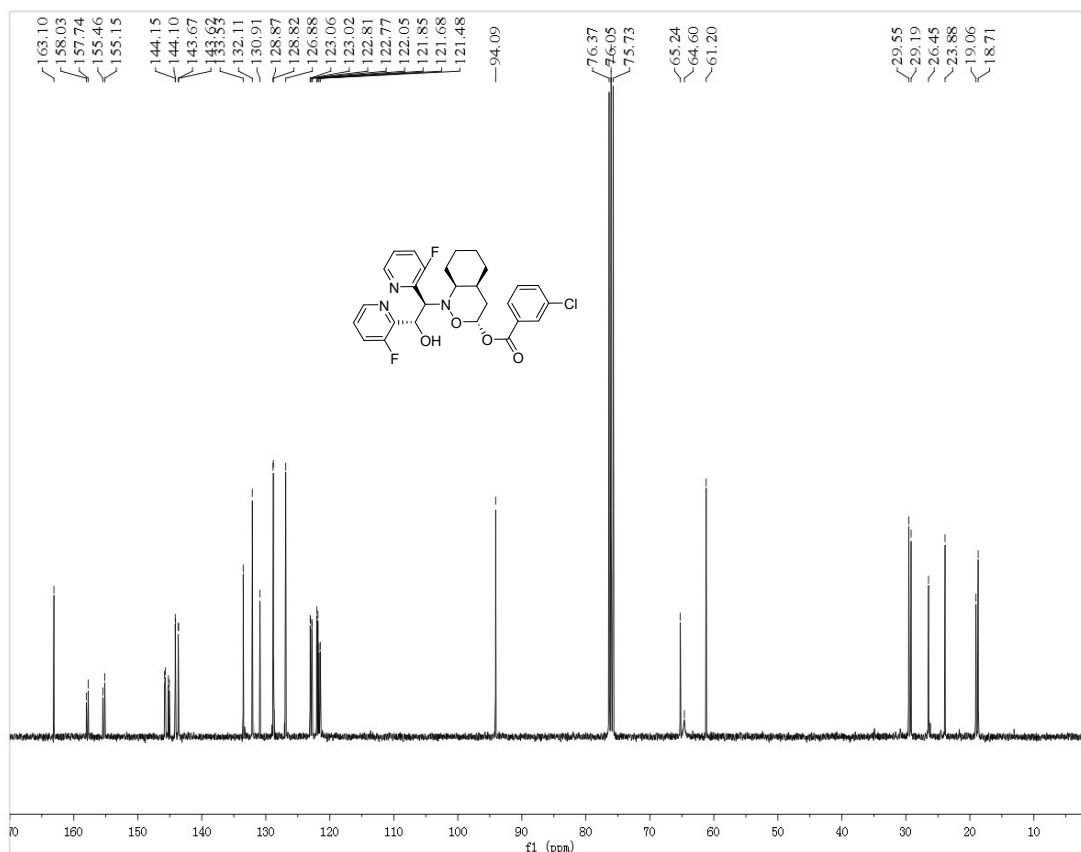

# <sup>1</sup>H and <sup>13</sup>C NMR of 6c-1

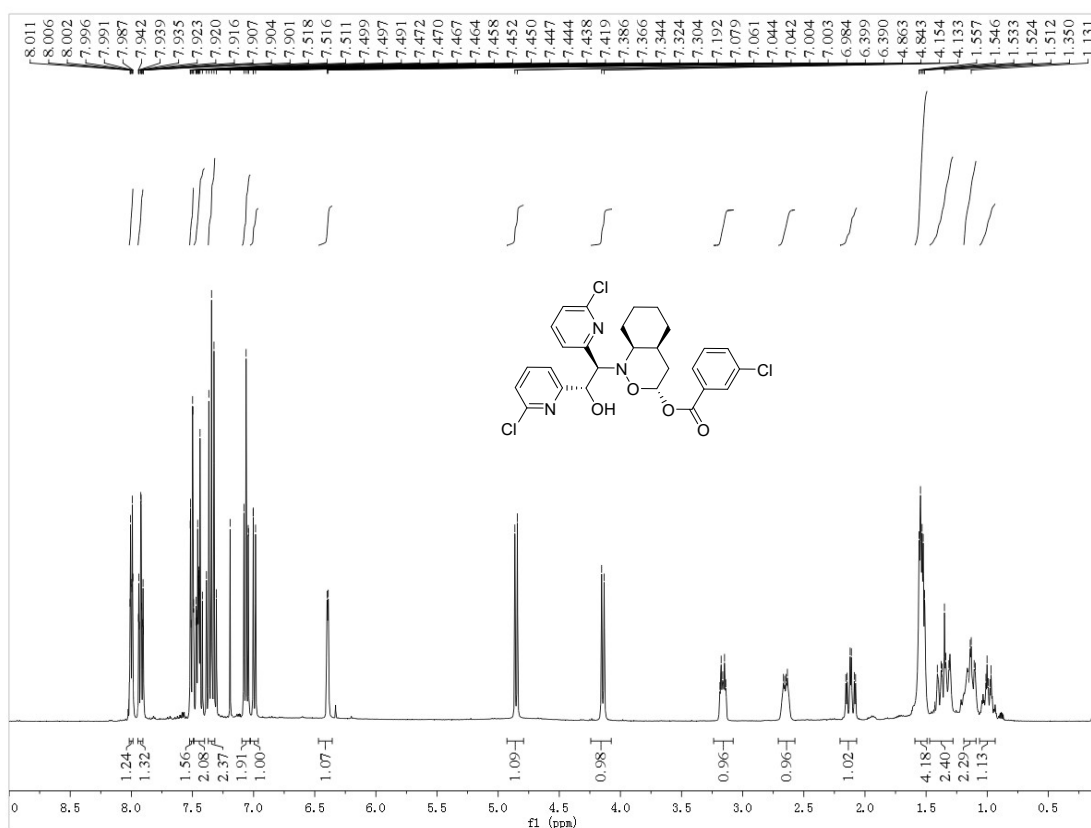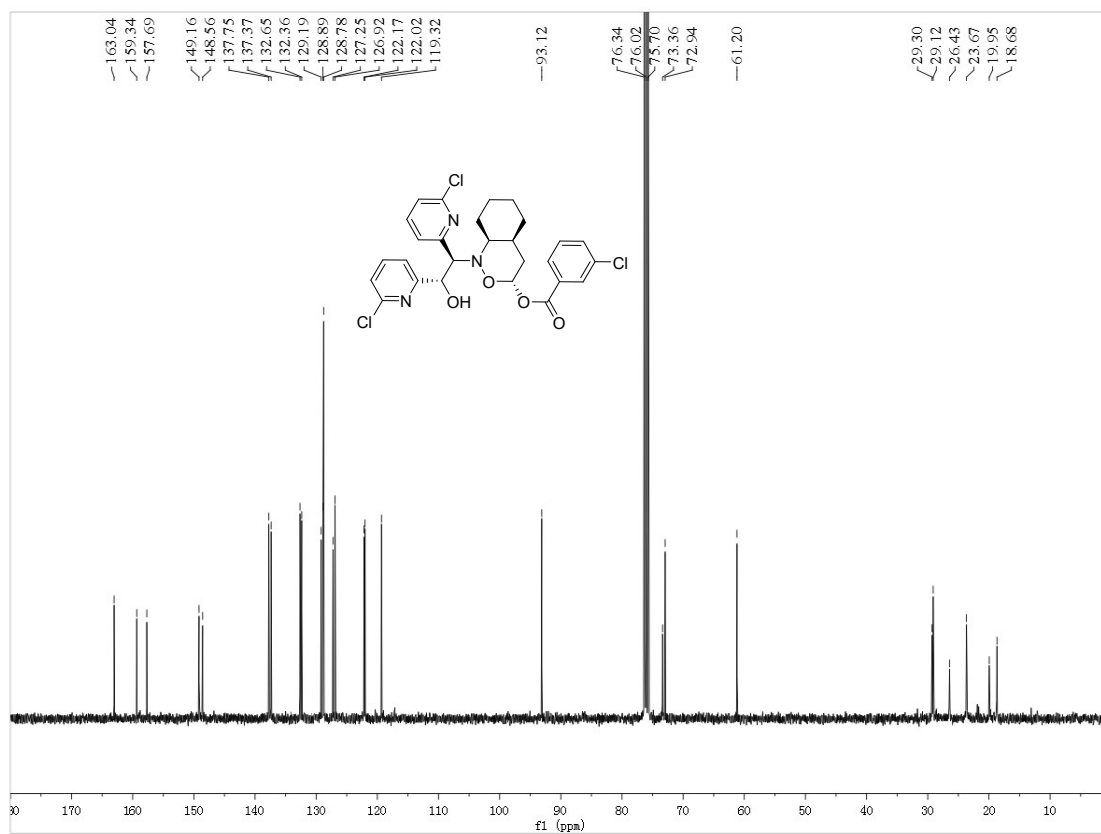



# <sup>1</sup>H and <sup>13</sup>C NMR of 6d-1

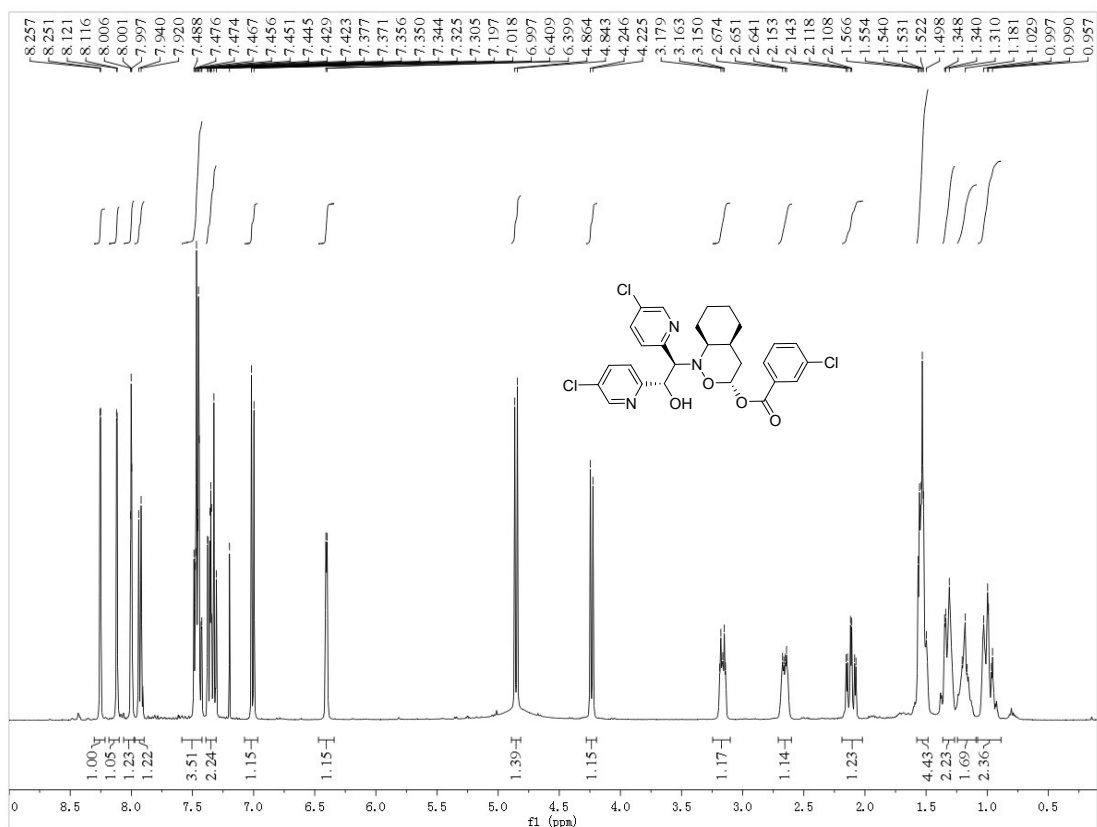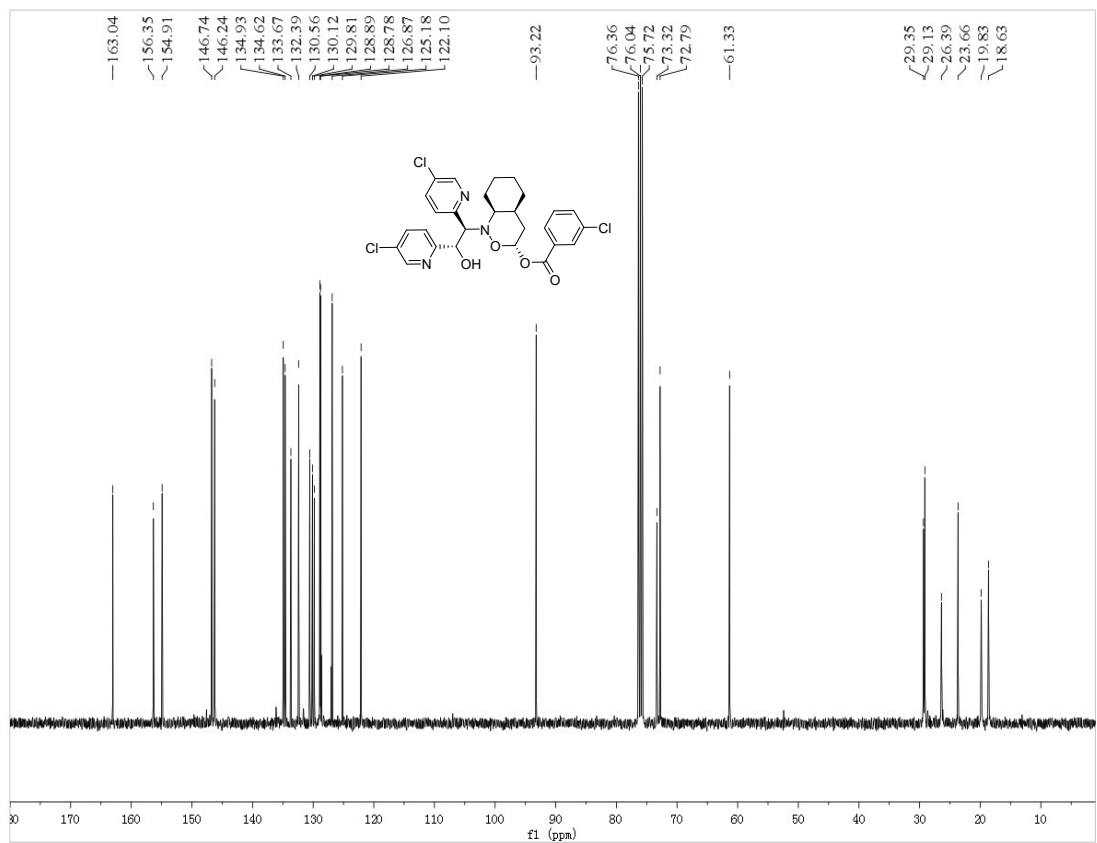

# <sup>1</sup>H and <sup>13</sup>C NMR of 6e-1

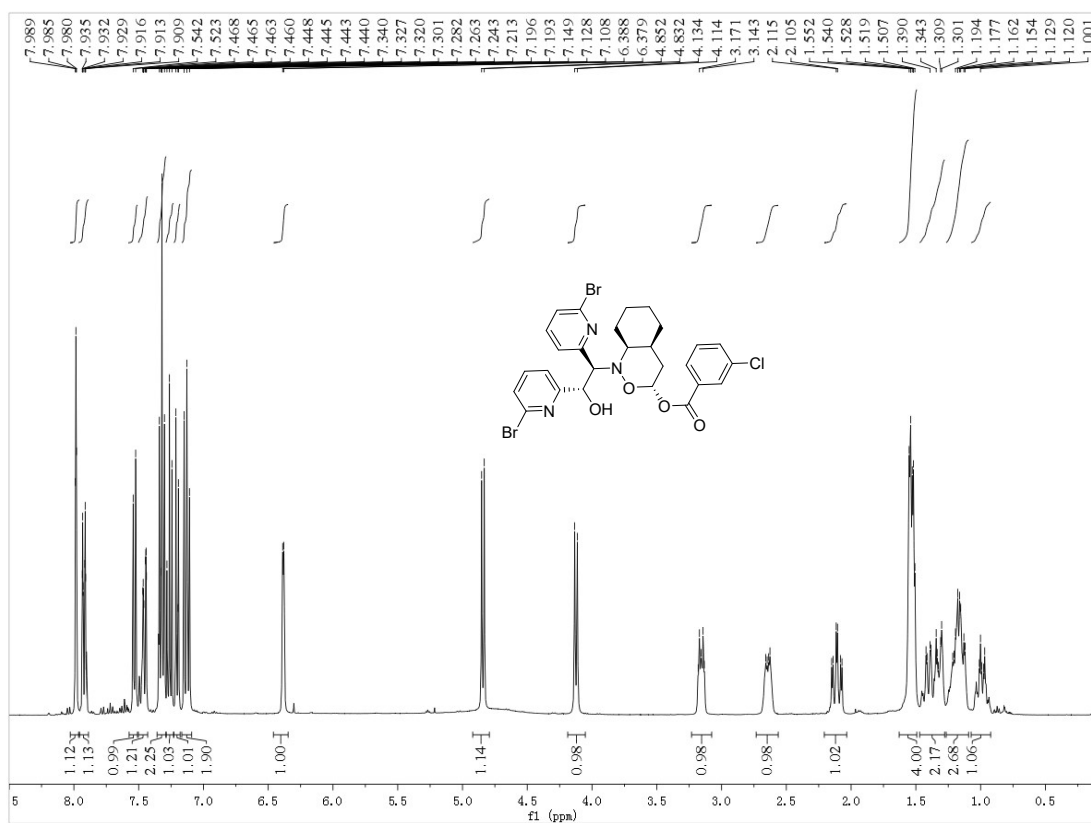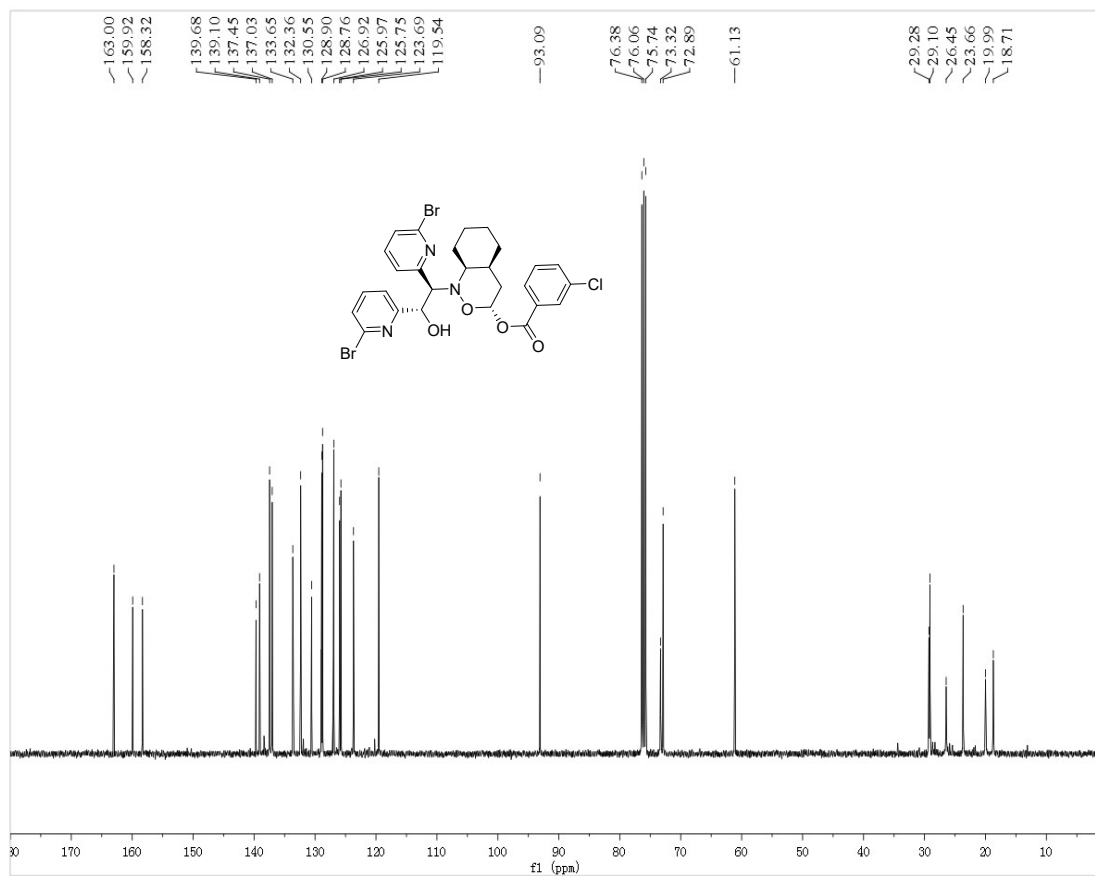

**<sup>1</sup>H and <sup>13</sup>C NMR of 6a-2**

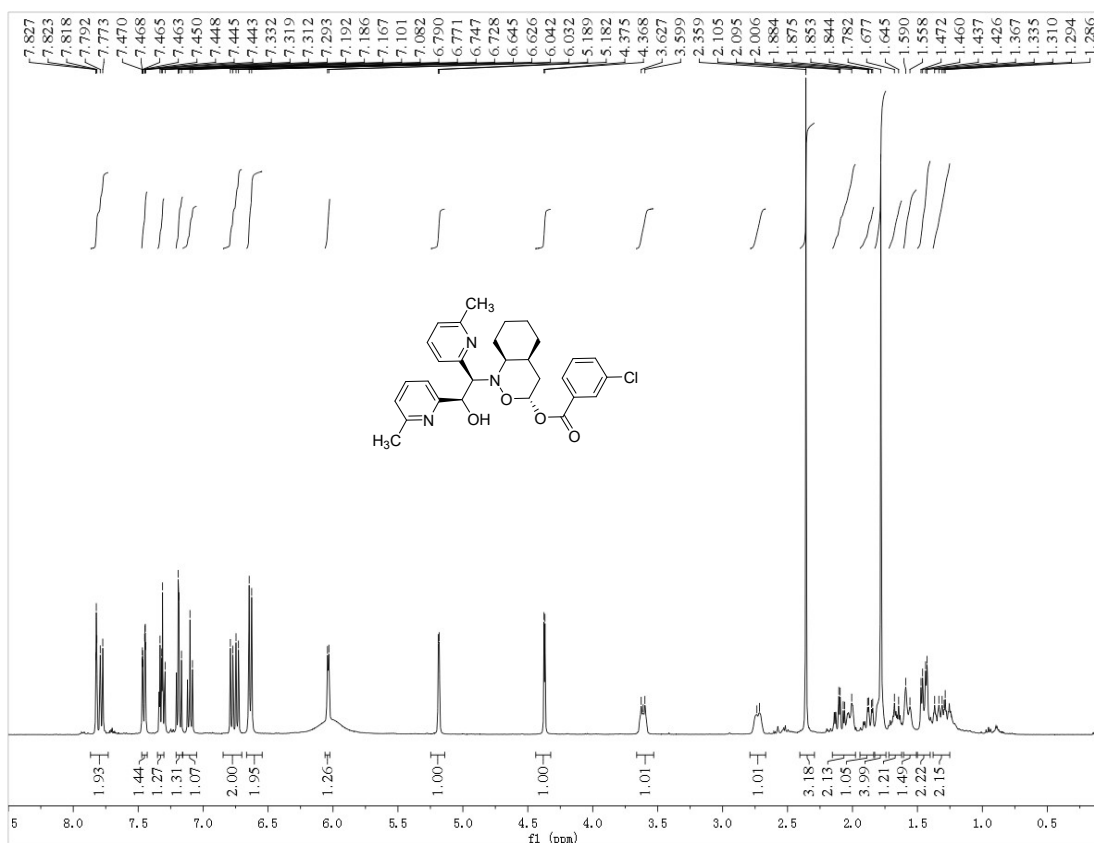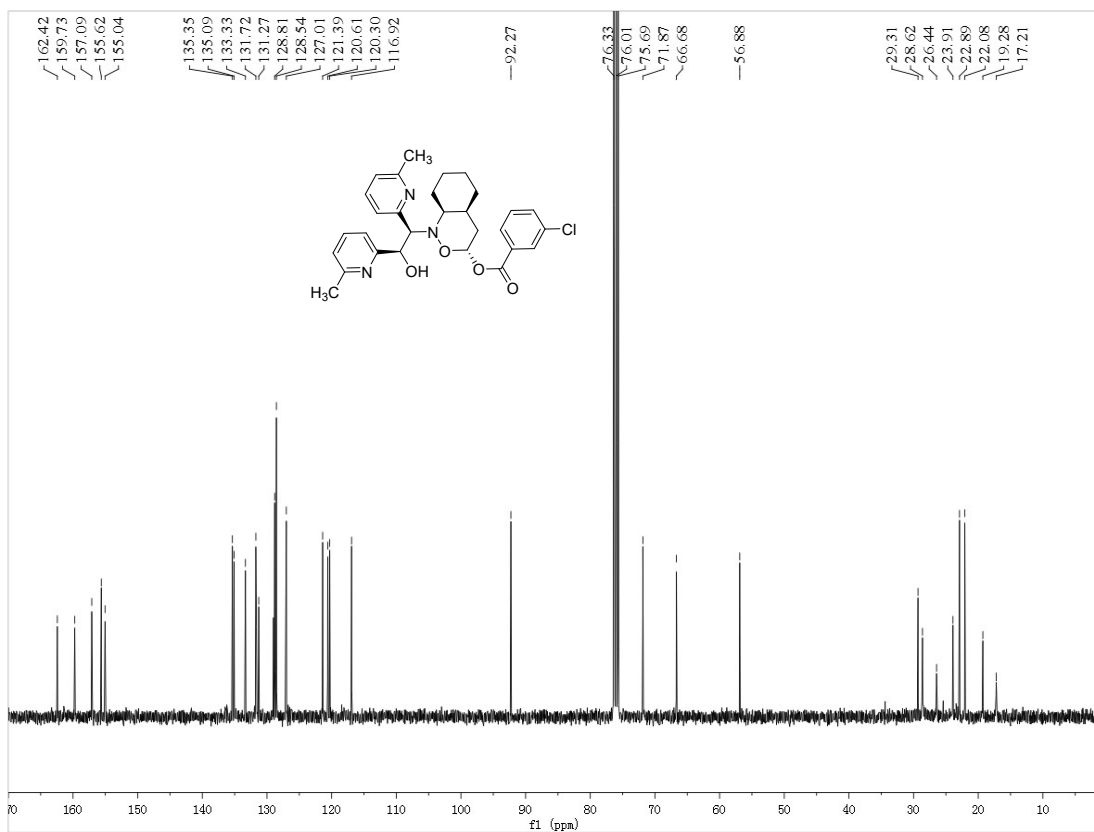

# <sup>1</sup>H and <sup>13</sup>C NMR of 6f-2

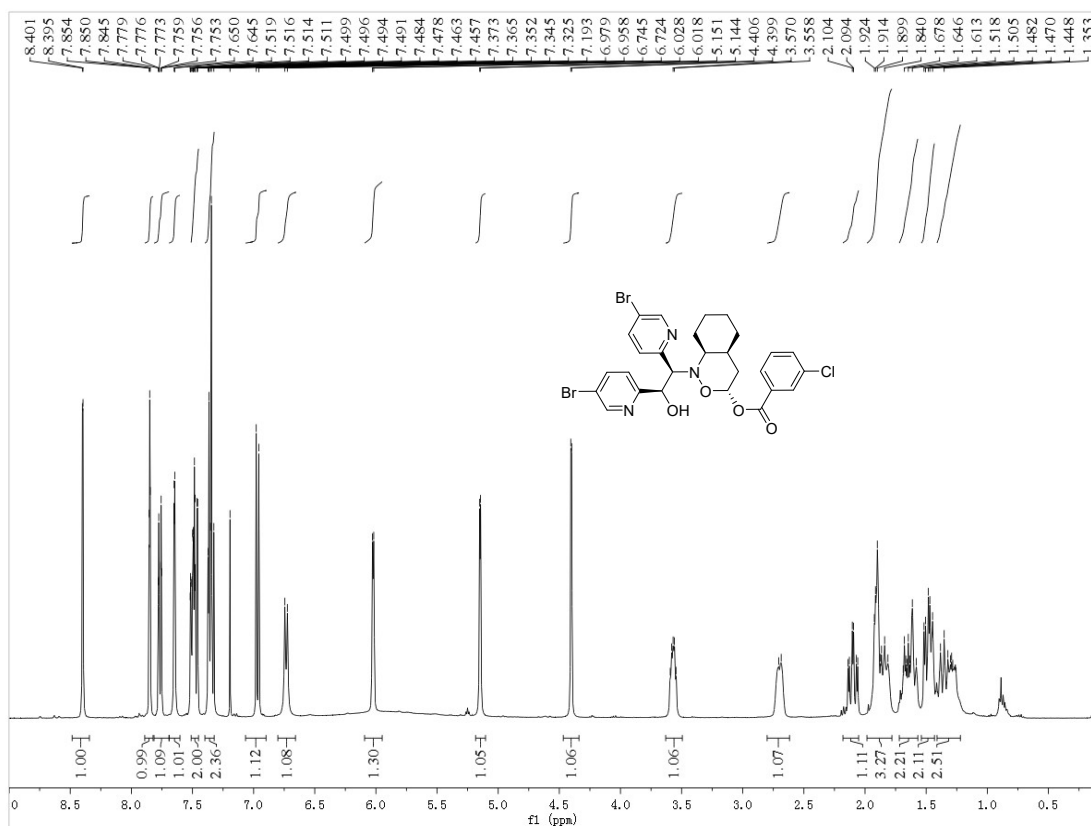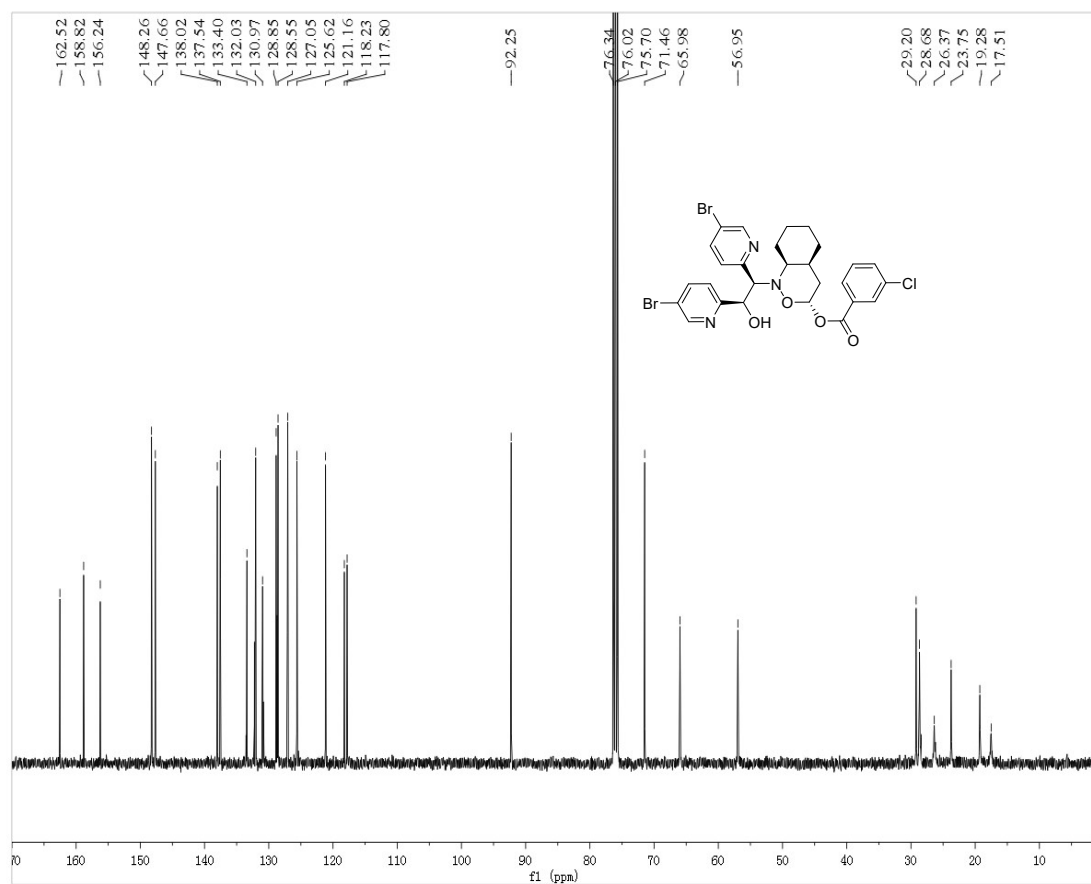

Supplement: d3qo01144e1.pdf [file d3qo01144e1.pdf]
